# Supplementary material
Source: ML conference proceedings conference paper supplement (https://openaccess.thecvf.com/content/ACCV2022/html/Cha_SAC-GAN__Face_ACCV_2022_paper.html)
Supplement: Supplementary file 1 [file Cha_SAC-GAN__Face_ACCV_2022_supplemental.pdf]

Archive with 80 entries (71 files):
- 0895-source_codes/
- 0895-source_codes/config.py
- 0895-source_codes/data/
- 0895-source_codes/data/dataset.py
- 0895-source_codes/data/fetcher.py
- 0895-source_codes/data/loader.py
- 0895-source_codes/main_inpaint.py
- 0895-source_codes/mask/
- 0895-source_codes/mask/face_mask.png
- 0895-source_codes/metrics/
- 0895-source_codes/metrics/eval.py
- 0895-source_codes/metrics/fid.py
- 0895-source_codes/models/
- 0895-source_codes/models/build_inpaint.py
- 0895-source_codes/models/discriminator.py
- 0895-source_codes/models/generator.py
- 0895-source_codes/models/layers.py
- 0895-source_codes/models/modulation_mapper.py
- 0895-source_codes/models/resnet18.py
- 0895-source_codes/models/resnet50_fr.py
- 0895-source_codes/README.md
- 0895-source_codes/requirements.txt
- 0895-source_codes/scripts/
- 0895-source_codes/scripts/sample.sh
- 0895-source_codes/scripts/train.sh
- 0895-source_codes/solver/
- 0895-source_codes/solver/loss_inpaint.py
- 0895-source_codes/solver/mask_tools.py
- 0895-source_codes/solver/misc_inpaint.py
- 0895-source_codes/solver/solver_inpaint.py
- 0895-source_codes/solver/utils.py
- 0895-source_codes/utils/
- 0895-source_codes/utils/checkpoint.py
- 0895-source_codes/utils/file.py
- 0895-source_codes/utils/image.py
- 0895-source_codes/utils/logger.py
- 0895-source_codes/utils/misc.py
- 0895-source_codes/utils/model.py
- 0895_supp.aux
- 0895_supp.bbl
- 0895_supp.blg
- 0895_supp.log
- 0895_supp.out
- 0895_supp.pdf
- 0895_supp.synctex.gz
- 0895_supp.tex
- egbib.bib
- llncs.cls
- splncs.bst
- supple_figs/
- supple_figs/f_m-eps-converted-to.pdf
- supple_figs/f_m.eps
- supple_figs/g_ng-eps-converted-to.pdf
- supple_figs/g_ng.eps
- supple_figs/gender_fail-eps-converted-to.pdf
- supple_figs/gender_fail.eps
- supple_figs/glasses_fail-eps-converted-to.pdf
- supple_figs/glasses_fail.eps
- supple_figs/m_f-eps-converted-to.pdf
- supple_figs/m_f.eps
- supple_figs/m_nm-eps-converted-to.pdf
- supple_figs/m_nm.eps
- supple_figs/mustache_fail-eps-converted-to.pdf
- supple_figs/mustache_fail.eps
- supple_figs/ng_g-eps-converted-to.pdf
- supple_figs/ng_g.eps
- supple_figs/nm_m-eps-converted-to.pdf
- supple_figs/nm_m.eps
- supple_figs/ns_s-eps-converted-to.pdf
- supple_figs/ns_s.eps
- supple_figs/ns_s_rand-eps-converted-to.pdf
- supple_figs/ns_s_rand.eps
- supple_figs/o_y-eps-converted-to.pdf
- supple_figs/o_y.eps
- supple_figs/s_ns-eps-converted-to.pdf
- supple_figs/s_ns.eps
- supple_figs/smile_fail-eps-converted-to.pdf
- supple_figs/smile_fail.eps
- supple_figs/y_o-eps-converted-to.pdf
- supple_figs/y_o.eps
