# Supplementary material
Source: ML conference proceedings conference paper supplement (https://openaccess.thecvf.com/content/ACCV2022/html/Cha_SAC-GAN__Face_ACCV_2022_paper.html)
Supplement: Supplementary file 1 [file Cha_SAC-GAN__Face_ACCV_2022_supplemental.pdf › 0895-source_codes/main_inpaint.py]

from munch import Munch
from config import load_cfg, save_cfg, print_cfg
from utils.misc import setup, validate
from solver.solver_inpaint import Solver_inpainting as Solver
from data.loader import get_train_loader, get_test_loader, get_selected_loader


def main(args):
    setup(args)
    validate(args)
    solver = Solver(args)

    if args.mode == 'train':
        loaders = Munch(train=get_train_loader(**args), test=get_test_loader(**args))
        if args.selected_path:
            loaders.selected = get_selected_loader(**args)
        solver.train(loaders)
    elif args.mode == 'sample':
        solver.sample()
    elif args.mode == 'eval':
        solver.evaluate()
    else:
        assert False, f"Unimplemented mode: {args.mode}"


if __name__ == '__main__':
    cfg = load_cfg()
    save_cfg(cfg)
    print_cfg(cfg)
    main(cfg)
