# Supplementary material
Source: ML conference proceedings conference paper supplement (https://openaccess.thecvf.com/content/ACCV2022/html/Cha_SAC-GAN__Face_ACCV_2022_paper.html)
Supplement: Supplementary file 1 [file Cha_SAC-GAN__Face_ACCV_2022_supplemental.pdf › 0895-source_codes/metrics/fid.py]

import torch
import torch.nn as nn
import argparse
import numpy as np
import copy
from munch import Munch
from scipy import linalg
from tqdm import tqdm
from torchvision import models
from data.loader import get_eval_loader
from utils.file import load_cache, save_cache, exist_cache, safe_filename
from utils.misc import str2bool


class InceptionV3(nn.Module):
    def __init__(self):
        super().__init__()
        inception = models.inception_v3(pretrained=True)
        self.block1 = nn.Sequential(
            inception.Conv2d_1a_3x3, inception.Conv2d_2a_3x3,
            inception.Conv2d_2b_3x3,
            nn.MaxPool2d(kernel_size=3, stride=2))
        self.block2 = nn.Sequential(
            inception.Conv2d_3b_1x1, inception.Conv2d_4a_3x3,
            nn.MaxPool2d(kernel_size=3, stride=2))
        self.block3 = nn.Sequential(
            inception.Mixed_5b, inception.Mixed_5c,
            inception.Mixed_5d, inception.Mixed_6a,
            inception.Mixed_6b, inception.Mixed_6c,
            inception.Mixed_6d, inception.Mixed_6e)
        self.block4 = nn.Sequential(
            inception.Mixed_7a, inception.Mixed_7b,
            inception.Mixed_7c,
            nn.AdaptiveAvgPool2d(output_size=(1, 1)))

    def forward(self, x):
        x = self.block1(x)
        x = self.block2(x)
        x = self.block3(x)
        x = self.block4(x)
        return x.view(x.size(0), -1)


def frechet_distance(mu, cov, mu2, cov2):
    cc, _ = linalg.sqrtm(np.dot(cov, cov2), disp=False)
    dist = np.sum((mu - mu2) ** 2) + np.trace(cov + cov2 - 2 * cc)
    return np.real(dist)


@torch.no_grad()
def get_fid_mu_cov(inception, path, img_size, batch_size, device, use_cache=False):
    cache_name = safe_filename(path, 'fid')
    cache_available = use_cache and exist_cache(cache_name)
    if cache_available:
        print('Loading cache...')
        cache = load_cache(cache_name)
        mu = cache['mu']
        cov = cache['cov']
        print('Cache loaded.')
    else:
        loader = get_eval_loader(path, img_size, batch_size)
        activations = []
        for x, imgname in tqdm(loader, total=len(loader)):
            activation = inception(x.to(device))
            activations.append(activation)
        activations = torch.cat(activations, dim=0).cpu().detach().numpy()
        mu = np.mean(activations, axis=0)
        cov = np.cov(activations, rowvar=False)

        if use_cache and not exist_cache(cache_name):
            print('Saving cache...')
            cache = {'mu': mu, 'cov': cov}
            save_cache(cache, cache_name)
    return mu, cov


@torch.no_grad()
def calculate_fid_given_paths(paths, img_size, batch_size, use_cache=True):
    print('Calculating FID for given paths %s and %s...' % (paths[0], paths[1]))
    device = torch.device('cuda' if torch.cuda.is_available() else 'cpu')
    inception = InceptionV3().eval().to(device)
    mu1, cov1 = get_fid_mu_cov(inception, paths[0], img_size, batch_size, device, use_cache=use_cache)
    mu2, cov2 = get_fid_mu_cov(inception, paths[1], img_size, batch_size, device, use_cache=False)
    res = frechet_distance(mu1, cov1, mu2, cov2)
    return res


if __name__ == '__main__':
    parser = argparse.ArgumentParser()
    parser.add_argument('--paths', type=str, nargs=2, help='paths to real and fake images')
    parser.add_argument('--img_size', type=int, default=256, help='image resolution')
    parser.add_argument('--batch_size', type=int, default=64, help='batch size to use')
    parser.add_argument('--dataset', type=str, default='CelebA')
    parser.add_argument('--use_cache', type=str2bool, default=True)
    args = parser.parse_args()
    print(args.__dict__)
    fid_value = calculate_fid_given_paths(args.paths, args.img_size, args.batch_size, use_cache=args.use_cache)
    print('FID: ', fid_value)
    with open('./fid.csv', 'a') as f:
        f.write(f"{fid_value},{args.paths[0]},{args.paths[1]}\n")
