# Supplementary material
Source: ML conference proceedings conference paper supplement (https://openaccess.thecvf.com/content/ACCV2022/html/Cha_SAC-GAN__Face_ACCV_2022_paper.html)
Supplement: Supplementary file 1 [file Cha_SAC-GAN__Face_ACCV_2022_supplemental.pdf › 0895-source_codes/models/discriminator.py]

import torch
from torch import nn
import numpy as np
from models.layers import ResBlk


class Discriminator(nn.Module):
    def __init__(self, args):
        super().__init__()
        self.args = args
        #img_size, num_domains, max_conv_dim = args.img_size, args.num_domains, args.d_max_conv_dim #2022-05-24
        img_size, max_conv_dim = args.img_size, args.d_max_conv_dim
        num_domains = args.num_domains + 1
        dim_in = 2 ** 14 // img_size
        blocks = []
        blocks += [nn.Conv2d(3, dim_in, 3, 1, 1)]
        repeat_num = int(np.log2(img_size)) - 2
        for _ in range(repeat_num):
            dim_out = min(dim_in * 2, max_conv_dim)
            blocks += [ResBlk(dim_in, dim_out, down_sample=True)]
            dim_in = dim_out
        blocks += [nn.LeakyReLU(0.2)]
        blocks += [nn.Conv2d(dim_out, dim_out, 4, 1, 0)]
        blocks += [nn.LeakyReLU(0.2)]
        blocks += [nn.Conv2d(dim_out, num_domains, 1, 1, 0)]
        self.main = nn.Sequential(*blocks)

    def forward(self, x, y):
        out = self.main(x)
        out = out.view(out.size(0), -1)  # (batch_size, num_domains)
        idx = torch.LongTensor(range(y.size(0))).to(y.device)
        out = out[idx, y]  # (batch)
        return out
