# Supplementary material
Source: ML conference proceedings conference paper supplement (https://openaccess.thecvf.com/content/ACCV2022/html/Cha_SAC-GAN__Face_ACCV_2022_paper.html)
Supplement: Supplementary file 1 [file Cha_SAC-GAN__Face_ACCV_2022_supplemental.pdf › 0895-source_codes/models/resnet50_fr.py]

#!/usr/bin/env python
# encoding: utf-8
'''
@author: wujiyang
@contact: wujiyang@hust.edu.cn
@file: cbam.py
@time: 2019/1/14 15:33
@desc: Convolutional Block Attention Module in ECCV 2018, including channel attention module and spatial attention module.
'''

import torch
from torch import nn
import time

class Flatten(nn.Module):
    def forward(self, input):
        return input.view(input.size(0), -1)

class SEModule(nn.Module):
    '''Squeeze and Excitation Module'''
    def __init__(self, channels, reduction):
        super(SEModule, self).__init__()
        self.avg_pool = nn.AdaptiveAvgPool2d(1)
        self.fc1 = nn.Conv2d(channels, channels // reduction, kernel_size=1, padding=0, bias=False)
        self.relu = nn.ReLU(inplace=True)
        self.fc2 = nn.Conv2d(channels // reduction, channels, kernel_size=1, padding=0, bias=False)
        self.sigmoid = nn.Sigmoid()

    def forward(self, x):
        input = x
        x = self.avg_pool(x)
        x = self.fc1(x)
        x = self.relu(x)
        x = self.fc2(x)
        x = self.sigmoid(x)

        return input * x

class CAModule(nn.Module):
    '''Channel Attention Module'''
    def __init__(self, channels, reduction):
        super(CAModule, self).__init__()
        self.avg_pool = nn.AdaptiveAvgPool2d(1)
        self.max_pool = nn.AdaptiveMaxPool2d(1)
        self.shared_mlp = nn.Sequential(nn.Conv2d(channels, channels // reduction, kernel_size=1, padding=0, bias=False),
                                        nn.ReLU(inplace=True),
                                        nn.Conv2d(channels // reduction, channels, kernel_size=1, padding=0, bias=False))
        self.sigmoid = nn.Sigmoid()

    def forward(self, x):
        input = x
        avg_pool = self.avg_pool(x)
        max_pool = self.max_pool(x)
        x = self.shared_mlp(avg_pool) + self.shared_mlp(max_pool)
        x = self.sigmoid(x)

        return input * x

class SAModule(nn.Module):
    '''Spatial Attention Module'''
    def __init__(self):
        super(SAModule, self).__init__()
        self.conv = nn.Conv2d(2, 1, kernel_size=3, padding=1, bias=False)
        self.sigmoid = nn.Sigmoid()

    def forward(self, x):
        input = x
        avg_c = torch.mean(x, 1, True)
        max_c, _ = torch.max(x, 1, True)
        x = torch.cat((avg_c, max_c), 1)
        x = self.conv(x)
        x = self.sigmoid(x)
        return input * x

class BottleNeck_IR(nn.Module):
    '''Improved Residual Bottlenecks'''
    def __init__(self, in_channel, out_channel, stride, dim_match):
        super(BottleNeck_IR, self).__init__()
        self.res_layer = nn.Sequential(nn.BatchNorm2d(in_channel),
                                       nn.Conv2d(in_channel, out_channel, (3, 3), 1, 1, bias=False),
                                       nn.BatchNorm2d(out_channel),
                                       nn.PReLU(out_channel),
                                       nn.Conv2d(out_channel, out_channel, (3, 3), stride, 1, bias=False),
                                       nn.BatchNorm2d(out_channel))
        if dim_match:
            self.shortcut_layer = None
        else:
            self.shortcut_layer = nn.Sequential(
                nn.Conv2d(in_channel, out_channel, kernel_size=(1, 1), stride=stride, bias=False),
                nn.BatchNorm2d(out_channel)
            )

    def forward(self, x):
        shortcut = x
        res = self.res_layer(x)

        if self.shortcut_layer is not None:
            shortcut = self.shortcut_layer(x)

        return shortcut + res

class BottleNeck_IR_SE(nn.Module):
    '''Improved Residual Bottlenecks with Squeeze and Excitation Module'''
    def __init__(self, in_channel, out_channel, stride, dim_match):
        super(BottleNeck_IR_SE, self).__init__()
        self.res_layer = nn.Sequential(nn.BatchNorm2d(in_channel),
                                       nn.Conv2d(in_channel, out_channel, (3, 3), 1, 1, bias=False),
                                       nn.BatchNorm2d(out_channel),
                                       nn.PReLU(out_channel),
                                       nn.Conv2d(out_channel, out_channel, (3, 3), stride, 1, bias=False),
                                       nn.BatchNorm2d(out_channel),
                                       SEModule(out_channel, 16))
        if dim_match:
            self.shortcut_layer = None
        else:
            self.shortcut_layer = nn.Sequential(
                nn.Conv2d(in_channel, out_channel, kernel_size=(1, 1), stride=stride, bias=False),
                nn.BatchNorm2d(out_channel)
            )

    def forward(self, x):
        shortcut = x
        res = self.res_layer(x)

        if self.shortcut_layer is not None:
            shortcut = self.shortcut_layer(x)

        return shortcut + res

class BottleNeck_IR_CAM(nn.Module):
    '''Improved Residual Bottlenecks with Channel Attention Module'''
    def __init__(self, in_channel, out_channel, stride, dim_match):
        super(BottleNeck_IR_CAM, self).__init__()
        self.res_layer = nn.Sequential(nn.BatchNorm2d(in_channel),
                                       nn.Conv2d(in_channel, out_channel, (3, 3), 1, 1, bias=False),
                                       nn.BatchNorm2d(out_channel),
                                       nn.PReLU(out_channel),
                                       nn.Conv2d(out_channel, out_channel, (3, 3), stride, 1, bias=False),
                                       nn.BatchNorm2d(out_channel),
                                       CAModule(out_channel, 16))
        if dim_match:
            self.shortcut_layer = None
        else:
            self.shortcut_layer = nn.Sequential(
                nn.Conv2d(in_channel, out_channel, kernel_size=(1, 1), stride=stride, bias=False),
                nn.BatchNorm2d(out_channel)
            )

    def forward(self, x):
        shortcut = x
        res = self.res_layer(x)

        if self.shortcut_layer is not None:
            shortcut = self.shortcut_layer(x)

        return shortcut + res

class BottleNeck_IR_SAM(nn.Module):
    '''Improved Residual Bottlenecks with Spatial Attention Module'''
    def __init__(self, in_channel, out_channel, stride, dim_match):
        super(BottleNeck_IR_SAM, self).__init__()
        self.res_layer = nn.Sequential(nn.BatchNorm2d(in_channel),
                                       nn.Conv2d(in_channel, out_channel, (3, 3), 1, 1, bias=False),
                                       nn.BatchNorm2d(out_channel),
                                       nn.PReLU(out_channel),
                                       nn.Conv2d(out_channel, out_channel, (3, 3), stride, 1, bias=False),
                                       nn.BatchNorm2d(out_channel),
                                       SAModule())
        if dim_match:
            self.shortcut_layer = None
        else:
            self.shortcut_layer = nn.Sequential(
                nn.Conv2d(in_channel, out_channel, kernel_size=(1, 1), stride=stride, bias=False),
                nn.BatchNorm2d(out_channel)
            )

    def forward(self, x):
        shortcut = x
        res = self.res_layer(x)

        if self.shortcut_layer is not None:
            shortcut = self.shortcut_layer(x)

        return shortcut + res

class BottleNeck_IR_CBAM(nn.Module):
    '''Improved Residual Bottleneck with Channel Attention Module and Spatial Attention Module'''
    def __init__(self, in_channel, out_channel, stride, dim_match):
        super(BottleNeck_IR_CBAM, self).__init__()
        self.res_layer = nn.Sequential(nn.BatchNorm2d(in_channel),
                                       nn.Conv2d(in_channel, out_channel, (3, 3), 1, 1, bias=False),
                                       nn.BatchNorm2d(out_channel),
                                       nn.PReLU(out_channel),
                                       nn.Conv2d(out_channel, out_channel, (3, 3), stride, 1, bias=False),
                                       nn.BatchNorm2d(out_channel),
                                       CAModule(out_channel, 16),
                                       SAModule()
                                       )
        if dim_match:
            self.shortcut_layer = None
        else:
            self.shortcut_layer = nn.Sequential(
                nn.Conv2d(in_channel, out_channel, kernel_size=(1, 1), stride=stride, bias=False),
                nn.BatchNorm2d(out_channel)
            )

    def forward(self, x):
        shortcut = x
        res = self.res_layer(x)

        if self.shortcut_layer is not None:
            shortcut = self.shortcut_layer(x)

        return shortcut + res


filter_list = [64, 64, 128, 256, 512]
def get_layers(num_layers):
    if num_layers == 50:
        return [3, 4, 14, 3]
    elif num_layers == 100:
        return [3, 13, 30, 3]
    elif num_layers == 152:
        return [3, 8, 36, 3]

class CBAMResNet(nn.Module):
    def __init__(self, num_layers, feature_dim=512, drop_ratio=0.4, mode='ir',filter_list=filter_list):
        super(CBAMResNet, self).__init__()
        assert num_layers in [50, 100, 152], 'num_layers should be 50, 100 or 152'
        assert mode in ['ir', 'ir_se', 'ir_cam', 'ir_sam', 'ir_cbam'], 'mode should be ir, ir_se, ir_cam, ir_sam or ir_cbam'
        layers = get_layers(num_layers)
        if mode == 'ir':
            block = BottleNeck_IR
        elif mode == 'ir_se':
            block = BottleNeck_IR_SE
        elif mode == 'ir_cam':
            block = BottleNeck_IR_CAM
        elif mode == 'ir_sam':
            block = BottleNeck_IR_SAM
        elif mode == 'ir_cbam':
            block = BottleNeck_IR_CBAM

        self.input_layer = nn.Sequential(nn.Conv2d(3, 64, (3, 3), stride=1, padding=1, bias=False),
                                         nn.BatchNorm2d(64),
                                         nn.PReLU(64))
        self.layer1 = self._make_layer(block, filter_list[0], filter_list[1], layers[0], stride=2)
        self.layer2 = self._make_layer(block, filter_list[1], filter_list[2], layers[1], stride=2)
        self.layer3 = self._make_layer(block, filter_list[2], filter_list[3], layers[2], stride=2)
        self.layer4 = self._make_layer(block, filter_list[3], filter_list[4], layers[3], stride=2)

        print(feature_dim)

        self.output_layer = nn.Sequential(nn.BatchNorm2d(512),
                                          nn.Dropout(drop_ratio),
                                          Flatten(),
                                          nn.Linear(512 * 8 * 8, feature_dim),
                                          nn.BatchNorm1d(feature_dim))

        # weight initialization
        for m in self.modules():
            if isinstance(m, nn.Conv2d) or isinstance(m, nn.Linear):
                nn.init.xavier_uniform_(m.weight)
                if m.bias is not None:
                    nn.init.constant_(m.bias, 0.0)
            elif isinstance(m, nn.BatchNorm2d) or isinstance(m, nn.BatchNorm1d):
                nn.init.constant_(m.weight, 1)
                nn.init.constant_(m.bias, 0)

    #----- added for load pretrained model
    def load_pretrained(self):
        self.load_state_dict(torch.load('models/CASIA_PRETRAINED.ckpt')['net_state_dict'])
        #self.eval()

    def _make_layer(self, block, in_channel, out_channel, blocks, stride):
        layers = []
        layers.append(block(in_channel, out_channel, stride, False))
        for i in range(1, blocks):
            layers.append(block(out_channel, out_channel, 1, True))

        return nn.Sequential(*layers)

    def forward(self, x):

        #print("x1 " + str(x.size()))
        x = self.input_layer(x)
        #print("x2 " + str(x.size()))
        x = self.layer1(x)
        #print("x3 " + str(x.size()))
        x = self.layer2(x)
        #print("x4 " + str(x.size()))
        x = self.layer3(x)
        #print("x5 " + str(x.size()))
        x = self.layer4(x)
        #print("x6 " + str(x.size()))
        x = self.output_layer(x)
        #print("x7 " + str(x.size()))


        return x

if __name__ == '__main__':
    input = torch.Tensor(2, 3, 112, 112)
    net = CBAMResNet(50, mode='ir')

    out = net(input)
    print(out.shape)
