# Supplementary material
Source: ML conference proceedings conference paper supplement (https://openaccess.thecvf.com/content/ACCV2022/html/Cha_SAC-GAN__Face_ACCV_2022_paper.html)
Supplement: Supplementary file 1 [file Cha_SAC-GAN__Face_ACCV_2022_supplemental.pdf › 0895-source_codes/README.md]

# Spatial-aware Attribute Controllable GAN for Image Inpainting
A PyTorch reimplementation for the paper [SAC-GAN : Face Image Inpainting with Spatial-aware Attribute Controllable GAN].
