# Supplementary material
Source: ML conference proceedings conference paper supplement (https://openaccess.thecvf.com/content/ACCV2022/html/Cha_SAC-GAN__Face_ACCV_2022_paper.html)
Supplement: Supplementary file 1 [file Cha_SAC-GAN__Face_ACCV_2022_supplemental.pdf › 0895-source_codes/solver/utils.py]

import torch
from torch import nn
from utils.image import save_image


def he_init(module):
    if isinstance(module, nn.Conv2d):
        nn.init.kaiming_normal_(module.weight, mode='fan_in', nonlinearity='relu')
        if module.bias is not None:
            nn.init.constant_(module.bias, 0)
    if isinstance(module, nn.Linear):
        nn.init.kaiming_normal_(module.weight, mode='fan_in', nonlinearity='relu')
        if module.bias is not None:
            nn.init.constant_(module.bias, 0)


def moving_average(model, model_ema, beta):
    for param, param_ema in zip(model.parameters(), model_ema.parameters()):
        param_ema.data = torch.lerp(param.data, param_ema.data, beta)


def requires_grad(model, flag=True):
    for parameter in model.parameters():
        parameter.requires_grad = flag
