# Supplementary material
Source: ML conference proceedings conference paper supplement (https://openaccess.thecvf.com/content/ACCV2022/html/Cha_SAC-GAN__Face_ACCV_2022_paper.html)
Supplement: Supplementary file 1 [file Cha_SAC-GAN__Face_ACCV_2022_supplemental.pdf › 0895-source_codes/utils/checkpoint.py]

import os
import torch


# Modified from https://github.com/clovaai/stargan-v2/blob/master/core/checkpoint.py

class CheckpointIO:
    def __init__(self, fname_template, **kwargs):
        os.makedirs(os.path.dirname(fname_template), exist_ok=True)
        self.fname_template = fname_template
        self.module_dict = kwargs

    def register(self, **kwargs):
        self.module_dict.update(kwargs)

    def save(self, step):
        fname = self.fname_template.format(step)
        print('Saving checkpoint into %s...' % fname)
        out_dict = {}
        for name, module in self.module_dict.items():
            out_dict[name] = module.state_dict()
        torch.save(out_dict, fname)

    def load(self, step):
        fname = self.fname_template.format(step)
        self.load_from_path(fname)

    def load_from_path(self, fname):
        assert os.path.exists(fname), fname + ' does not exist!'
        print('Loading checkpoint from %s...' % fname)
        if torch.cuda.is_available():
            module_dict = torch.load(fname)
        else:
            module_dict = torch.load(fname, map_location=torch.device('cpu'))
        for name, module in self.module_dict.items():
            module.load_state_dict(module_dict[name])
