# Supplementary material
Source: ML conference proceedings conference paper supplement (https://openaccess.thecvf.com/content/ACCV2022/html/Cha_SAC-GAN__Face_ACCV_2022_paper.html)
Supplement: Supplementary file 1 [file Cha_SAC-GAN__Face_ACCV_2022_supplemental.pdf › 0895-source_codes/utils/image.py]

import torchvision


def denormalize(x):
    # range (-1, 1) to range (0, 1)
    out = (x + 1) / 2
    return out.clamp_(0, 1)


def save_image(x, col_num, filename):
    x = denormalize(x)
    torchvision.utils.save_image(x.cpu(), filename, nrow=col_num, padding=0)
