# Supplementary material
Source: ML conference proceedings conference paper supplement (https://openaccess.thecvf.com/content/ACCV2022/html/Cha_SAC-GAN__Face_ACCV_2022_paper.html)
Supplement: Supplementary file 1 [file Cha_SAC-GAN__Face_ACCV_2022_supplemental.pdf › 0895-source_codes/utils/model.py]

"""
Model related utils.
"""


def print_network(network, name):
    num_params = 0
    for p in network.parameters():
        num_params += p.numel()
    print(f"Parameter number of {name}: {num_params/1e6:.4f}M")
