# Supplementary material
Source: ML conference proceedings conference paper supplement (https://openaccess.thecvf.com/content/ACCV2022/html/Cha_SAC-GAN__Face_ACCV_2022_paper.html)
Supplement: Supplementary file 1 [file Cha_SAC-GAN__Face_ACCV_2022_supplemental.pdf › 0895_supp.aux]

\relax 
\providecommand\hyper@newdestlabel[2]{}
\providecommand\HyperFirstAtBeginDocument{\AtBeginDocument}
\HyperFirstAtBeginDocument{\ifx\hyper@anchor\@undefined
\global\let\oldcontentsline\contentsline
\gdef\contentsline#1#2#3#4{\oldcontentsline{#1}{#2}{#3}}
\global\let\oldnewlabel\newlabel
\gdef\newlabel#1#2{\newlabelxx{#1}#2}
\gdef\newlabelxx#1#2#3#4#5#6{\oldnewlabel{#1}{{#2}{#3}}}
\AtEndDocument{\ifx\hyper@anchor\@undefined
\let\contentsline\oldcontentsline
\let\newlabel\oldnewlabel
\fi}
\fi}
\global\let\hyper@last\relax 
\gdef\HyperFirstAtBeginDocument#1{#1}
\providecommand\HyField@AuxAddToFields[1]{}
\providecommand\HyField@AuxAddToCoFields[2]{}
\citation{yang2021l2m}
\citation{karras2020analyzing}
\citation{zhao2021large}
\citation{liu2019few}
\citation{arjovsky2017wasserstein}
\citation{liu2015deep}
\citation{zhang2016joint}
\@writefile{toc}{\contentsline {title}{Supplementary Materials}{1}{chapter.1}\protected@file@percent }
\@writefile{toc}{\authcount {1}}
\@writefile{toc}{\contentsline {author}{Anonymous ACCV 2022 submission}{1}{chapter.1}\protected@file@percent }
\@writefile{toc}{\contentsline {section}{\numberline {1}Network Architecture}{1}{section.1.1}\protected@file@percent }
\@writefile{toc}{\contentsline {subsection}{\numberline {1.1}Generator}{1}{subsection.1.1.1}\protected@file@percent }
\@writefile{toc}{\contentsline {subsection}{\numberline {1.2}Discriminator}{1}{subsection.1.1.2}\protected@file@percent }
\@writefile{toc}{\contentsline {section}{\numberline {2}Dataset Preparation}{1}{section.1.2}\protected@file@percent }
\@writefile{toc}{\contentsline {subsection}{\numberline {2.1}Images}{1}{subsection.1.2.1}\protected@file@percent }
\@writefile{lot}{\contentsline {table}{\numberline {1}{\ignorespaces The configurations of the encoder and the decoder from SAC-GAN.}}{2}{table.1.1}\protected@file@percent }
\newlabel{tab:gen}{{1}{2}{The configurations of the encoder and the decoder from SAC-GAN}{table.1.1}{}}
\citation{yu2019free}
\citation{deng2019arcface}
\citation{he2016deep}
\citation{yi2014learning}
\@writefile{toc}{\contentsline {subsection}{\numberline {2.2}Masks}{3}{subsection.1.2.2}\protected@file@percent }
\@writefile{toc}{\contentsline {subsection}{\numberline {2.3}Face Recognizer}{3}{subsection.1.2.3}\protected@file@percent }
\@writefile{toc}{\contentsline {section}{\numberline {3}Succeeded Cases}{3}{section.1.3}\protected@file@percent }
\@writefile{toc}{\contentsline {section}{\numberline {4}Failure Cases}{3}{section.1.4}\protected@file@percent }
\citation{zhang2017age}
\@writefile{lot}{\contentsline {table}{\numberline {2}{\ignorespaces The configurations of the encoder and the mapping network $\mathcal  {M}$.}}{4}{table.1.2}\protected@file@percent }
\newlabel{tab:map}{{2}{4}{The configurations of the encoder and the mapping network $\mathcal {M}$}{table.1.2}{}}
\@writefile{toc}{\contentsline {subsection}{\numberline {4.1}Application to Different Dataset}{4}{subsection.1.4.1}\protected@file@percent }
\@writefile{lof}{\contentsline {figure}{\numberline {1}{\ignorespaces  Examples of face image inpainting with 'smile' attribute. Images are sampled from CelebA dataset. From top to bottom: original image, input image, and reconstructed result.}}{5}{figure.1.1}\protected@file@percent }
\newlabel{fig:result_ns_s}{{1}{5}{Examples of face image inpainting with 'smile' attribute. Images are sampled from CelebA dataset. From top to bottom: original image, input image, and reconstructed result}{figure.1.1}{}}
\@writefile{lof}{\contentsline {figure}{\numberline {2}{\ignorespaces  Examples of face image inpainting with 'non-smile' attribute. Images are sampled from CelebA dataset. From top to bottom: original image, input image, and reconstructed result.}}{5}{figure.1.2}\protected@file@percent }
\newlabel{fig:result_s_ns}{{2}{5}{Examples of face image inpainting with 'non-smile' attribute. Images are sampled from CelebA dataset. From top to bottom: original image, input image, and reconstructed result}{figure.1.2}{}}
\@writefile{lof}{\contentsline {figure}{\numberline {3}{\ignorespaces  Examples of face image inpainting with 'smile' attribute and irregular masks. Images are sampled from CelebA dataset. From top to bottom: original image, input image, and reconstructed result. column 1-6 show successfully reconstructed output with 'smile' attribute but in cases of column 7-8, the target 'smile' attribute was not applied because the mask did not cover important part for the expected attribute.}}{5}{figure.1.3}\protected@file@percent }
\newlabel{fig:result_ns_s_rand}{{3}{5}{Examples of face image inpainting with 'smile' attribute and irregular masks. Images are sampled from CelebA dataset. From top to bottom: original image, input image, and reconstructed result. column 1-6 show successfully reconstructed output with 'smile' attribute but in cases of column 7-8, the target 'smile' attribute was not applied because the mask did not cover important part for the expected attribute}{figure.1.3}{}}
\@writefile{lof}{\contentsline {figure}{\numberline {4}{\ignorespaces  Examples of face image inpainting with 'glasses' attribute. Images are sampled from CelebA dataset. From top to bottom: original image, input image, and reconstructed result.}}{6}{figure.1.4}\protected@file@percent }
\newlabel{fig:result_ng_g}{{4}{6}{Examples of face image inpainting with 'glasses' attribute. Images are sampled from CelebA dataset. From top to bottom: original image, input image, and reconstructed result}{figure.1.4}{}}
\@writefile{lof}{\contentsline {figure}{\numberline {5}{\ignorespaces  Examples of face image inpainting with 'non-glasses' attribute. Images are sampled from CelebA dataset. From top to bottom: original image, input image, and reconstructed result.}}{6}{figure.1.5}\protected@file@percent }
\newlabel{fig:result_g_ng}{{5}{6}{Examples of face image inpainting with 'non-glasses' attribute. Images are sampled from CelebA dataset. From top to bottom: original image, input image, and reconstructed result}{figure.1.5}{}}
\@writefile{lof}{\contentsline {figure}{\numberline {6}{\ignorespaces  Examples of face image inpainting with 'mustache' attribute. Images are sampled from CelebA dataset. From top to bottom: original image, input image, and reconstructed result.}}{6}{figure.1.6}\protected@file@percent }
\newlabel{fig:result_nm_m}{{6}{6}{Examples of face image inpainting with 'mustache' attribute. Images are sampled from CelebA dataset. From top to bottom: original image, input image, and reconstructed result}{figure.1.6}{}}
\@writefile{lof}{\contentsline {figure}{\numberline {7}{\ignorespaces  Examples of face image inpainting with 'non-mustache' attribute. Images are sampled from CelebA dataset. From top to bottom: original image, input image, and reconstructed result.}}{7}{figure.1.7}\protected@file@percent }
\newlabel{fig:result_m_nm}{{7}{7}{Examples of face image inpainting with 'non-mustache' attribute. Images are sampled from CelebA dataset. From top to bottom: original image, input image, and reconstructed result}{figure.1.7}{}}
\@writefile{lof}{\contentsline {figure}{\numberline {8}{\ignorespaces  Examples of face image inpainting with 'male' attribute. Images are sampled from CelebA dataset. From top to bottom: original image, input image, and reconstructed result.}}{7}{figure.1.8}\protected@file@percent }
\newlabel{fig:result_fm}{{8}{7}{Examples of face image inpainting with 'male' attribute. Images are sampled from CelebA dataset. From top to bottom: original image, input image, and reconstructed result}{figure.1.8}{}}
\@writefile{lof}{\contentsline {figure}{\numberline {9}{\ignorespaces  Examples of face image inpainting with 'female' attribute. Images are sampled from CelebA dataset. From top to bottom: original image, input image, and reconstructed result.}}{7}{figure.1.9}\protected@file@percent }
\newlabel{fig:result_mf}{{9}{7}{Examples of face image inpainting with 'female' attribute. Images are sampled from CelebA dataset. From top to bottom: original image, input image, and reconstructed result}{figure.1.9}{}}
\@writefile{lof}{\contentsline {figure}{\numberline {10}{\ignorespaces  Failed cases of face image inpainting with 'smile' (left) and 'non-smile' (right) attributes.}}{8}{figure.1.10}\protected@file@percent }
\newlabel{fig:result_fail_smile}{{10}{8}{Failed cases of face image inpainting with 'smile' (left) and 'non-smile' (right) attributes}{figure.1.10}{}}
\@writefile{lof}{\contentsline {figure}{\numberline {11}{\ignorespaces Failed cases of face image inpainting with 'glasses' (left) and 'non-glasses' (right) attributes.}}{8}{figure.1.11}\protected@file@percent }
\newlabel{fig:result_fail_glasses}{{11}{8}{Failed cases of face image inpainting with 'glasses' (left) and 'non-glasses' (right) attributes}{figure.1.11}{}}
\@writefile{lof}{\contentsline {figure}{\numberline {12}{\ignorespaces  Failed cases of face image inpainting with 'mustache' (left) and 'non-mustache' (right) attributes.}}{8}{figure.1.12}\protected@file@percent }
\newlabel{fig:result_fail_mustache}{{12}{8}{Failed cases of face image inpainting with 'mustache' (left) and 'non-mustache' (right) attributes}{figure.1.12}{}}
\@writefile{lof}{\contentsline {figure}{\numberline {13}{\ignorespaces  Failed cases of face image inpainting with 'male' (left) and 'female' (right) attributes.}}{9}{figure.1.13}\protected@file@percent }
\newlabel{fig:result_fail_gender}{{13}{9}{Failed cases of face image inpainting with 'male' (left) and 'female' (right) attributes}{figure.1.13}{}}
\@writefile{lof}{\contentsline {figure}{\numberline {14}{\ignorespaces  Examples of face image inpainting with 'old' attribute. From top to bottom: original image, input image, and reconstructed result.}}{9}{figure.1.14}\protected@file@percent }
\newlabel{fig:result_yo}{{14}{9}{Examples of face image inpainting with 'old' attribute. From top to bottom: original image, input image, and reconstructed result}{figure.1.14}{}}
\@writefile{lof}{\contentsline {figure}{\numberline {15}{\ignorespaces  Examples of face image inpainting with 'young' attribute. We employed shuffled dataset from CelebA and UTK. From top to bottom: original image, input image, reconstructed result using only CelebA, recontructed result using CelebA and young face images from UTK. Due to lack of young images in CelebA dataset, dataset mixing with UTK demonstrated more visually improved results.}}{9}{figure.1.15}\protected@file@percent }
\newlabel{fig:result_oy}{{15}{9}{Examples of face image inpainting with 'young' attribute. We employed shuffled dataset from CelebA and UTK. From top to bottom: original image, input image, reconstructed result using only CelebA, recontructed result using CelebA and young face images from UTK. Due to lack of young images in CelebA dataset, dataset mixing with UTK demonstrated more visually improved results}{figure.1.15}{}}
\bibstyle{splncs}
\bibdata{egbib}
\bibcite{yang2021l2m}{1}
\bibcite{karras2020analyzing}{2}
\bibcite{zhao2021large}{3}
\bibcite{liu2019few}{4}
\bibcite{arjovsky2017wasserstein}{5}
\bibcite{liu2015deep}{6}
\bibcite{zhang2016joint}{7}
\bibcite{yu2019free}{8}
\bibcite{deng2019arcface}{9}
\bibcite{he2016deep}{10}
\bibcite{yi2014learning}{11}
\bibcite{zhang2017age}{12}
\gdef \@abspage@last{10}
