# Supplementary material
Source: ML conference proceedings conference paper supplement (https://openaccess.thecvf.com/content/ACCV2022/html/Cha_SAC-GAN__Face_ACCV_2022_paper.html)
Supplement: Supplementary file 1 [file Cha_SAC-GAN__Face_ACCV_2022_supplemental.pdf › 0895_supp.bbl]

\begin{thebibliography}{10}

\bibitem{yang2021l2m}
Yang, G., Fei, N., Ding, M., Liu, G., Lu, Z., Xiang, T.:
\newblock L2m-gan: Learning to manipulate latent space semantics for facial
  attribute editing.
\newblock In: Proceedings of the IEEE/CVF Conference on Computer Vision and
  Pattern Recognition. (2021)  2951--2960

\bibitem{karras2020analyzing}
Karras, T., Laine, S., Aittala, M., Hellsten, J., Lehtinen, J., Aila, T.:
\newblock Analyzing and improving the image quality of stylegan.
\newblock In: Proceedings of the IEEE/CVF conference on computer vision and
  pattern recognition. (2020)  8110--8119

\bibitem{zhao2021large}
Zhao, S., Cui, J., Sheng, Y., Dong, Y., Liang, X., Chang, E.I., Xu, Y.:
\newblock Large scale image completion via co-modulated generative adversarial
  networks.
\newblock arXiv preprint arXiv:2103.10428 (2021)

\bibitem{liu2019few}
Liu, M.Y., Huang, X., Mallya, A., Karras, T., Aila, T., Lehtinen, J., Kautz,
  J.:
\newblock Few-shot unsupervised image-to-image translation.
\newblock In: Proceedings of the IEEE/CVF International Conference on Computer
  Vision. (2019)  10551--10560

\bibitem{arjovsky2017wasserstein}
Arjovsky, M., Chintala, S., Bottou, L.:
\newblock Wasserstein generative adversarial networks.
\newblock In: International conference on machine learning, PMLR (2017)
  214--223

\bibitem{liu2015deep}
Liu, Z., Luo, P., Wang, X., Tang, X.:
\newblock Deep learning face attributes in the wild.
\newblock In: Proceedings of the IEEE international conference on computer
  vision. (2015)  3730--3738

\bibitem{zhang2016joint}
Zhang, K., Zhang, Z., Li, Z., Qiao, Y.:
\newblock Joint face detection and alignment using multitask cascaded
  convolutional networks.
\newblock IEEE signal processing letters \textbf{23} (2016)  1499--1503

\bibitem{yu2019free}
Yu, J., Lin, Z., Yang, J., Shen, X., Lu, X., Huang, T.S.:
\newblock Free-form image inpainting with gated convolution.
\newblock In: Proceedings of the IEEE/CVF International Conference on Computer
  Vision. (2019)  4471--4480

\bibitem{deng2019arcface}
Deng, J., Guo, J., Xue, N., Zafeiriou, S.:
\newblock Arcface: Additive angular margin loss for deep face recognition.
\newblock In: Proceedings of the IEEE/CVF conference on computer vision and
  pattern recognition. (2019)  4690--4699

\bibitem{he2016deep}
He, K., Zhang, X., Ren, S., Sun, J.:
\newblock Deep residual learning for image recognition.
\newblock In: Proceedings of the IEEE conference on computer vision and pattern
  recognition. (2016)  770--778

\bibitem{yi2014learning}
Yi, D., Lei, Z., Liao, S., Li, S.Z.:
\newblock Learning face representation from scratch.
\newblock arXiv preprint arXiv:1411.7923 (2014)

\bibitem{zhang2017age}
Zhang, Z., Song, Y., Qi, H.:
\newblock Age progression/regression by conditional adversarial autoencoder.
\newblock In: Proceedings of the IEEE conference on computer vision and pattern
  recognition. (2017)  5810--5818

\end{thebibliography}
