# Supplementary material
Source: ML conference proceedings conference paper supplement (https://openaccess.thecvf.com/content/ACCV2022/html/Cha_SAC-GAN__Face_ACCV_2022_paper.html)
Supplement: Supplementary file 1 [file Cha_SAC-GAN__Face_ACCV_2022_supplemental.pdf › 0895_supp.blg]

This is BibTeX, Version 0.99d (TeX Live 2021/W32TeX)
Capacity: max_strings=200000, hash_size=200000, hash_prime=170003
The top-level auxiliary file: 0895_supple.aux
The style file: splncs.bst
Database file #1: egbib.bib
You've used 12 entries,
            2043 wiz_defined-function locations,
            548 strings with 6086 characters,
and the built_in function-call counts, 4924 in all, are:
= -- 499
> -- 198
< -- 10
+ -- 70
- -- 58
* -- 319
:= -- 624
add.period$ -- 20
call.type$ -- 12
change.case$ -- 12
chr.to.int$ -- 0
cite$ -- 12
duplicate$ -- 255
empty$ -- 455
format.name$ -- 58
if$ -- 1212
int.to.chr$ -- 0
int.to.str$ -- 12
missing$ -- 12
newline$ -- 63
num.names$ -- 12
pop$ -- 63
preamble$ -- 1
purify$ -- 0
quote$ -- 0
skip$ -- 213
stack$ -- 0
substring$ -- 392
swap$ -- 142
text.length$ -- 10
text.prefix$ -- 0
top$ -- 0
type$ -- 0
warning$ -- 0
while$ -- 42
width$ -- 14
write$ -- 134
