# Supplementary material
Source: ML conference proceedings conference paper supplement (https://openaccess.thecvf.com/content/ACCV2022/html/Cha_SAC-GAN__Face_ACCV_2022_paper.html)
Supplement: Supplementary file 1 [file Cha_SAC-GAN__Face_ACCV_2022_supplemental.pdf › 0895_supp.log]

This is pdfTeX, Version 3.141592653-2.6-1.40.22 (TeX Live 2021/W32TeX) (preloaded format=pdflatex 2021.6.15)  24 OCT 2022 14:18
entering extended mode
 restricted \write18 enabled.
 %&-line parsing enabled.
**0895_supp.tex
(./0895_supp.tex
LaTeX2e <2021-06-01>
L3 programming layer <2021-06-01> (./llncs.cls
Document Class: llncs 2022/01/12 v2.21 
 LaTeX document class for Lecture Notes in Computer Science
(c:/texlive/2021/texmf-dist/tex/latex/base/article.cls
Document Class: article 2021/02/12 v1.4n Standard LaTeX document class
(c:/texlive/2021/texmf-dist/tex/latex/base/size10.clo
File: size10.clo 2021/02/12 v1.4n Standard LaTeX file (size option)
)
\c@part=\count182
\c@section=\count183
\c@subsection=\count184
\c@subsubsection=\count185
\c@paragraph=\count186
\c@subparagraph=\count187
\c@figure=\count188
\c@table=\count189
\abovecaptionskip=\skip47
\belowcaptionskip=\skip48
\bibindent=\dimen138
)
(c:/texlive/2021/texmf-dist/tex/latex/tools/multicol.sty
Package: multicol 2019/12/09 v1.8y multicolumn formatting (FMi)
\c@tracingmulticols=\count190
\mult@box=\box50
\multicol@leftmargin=\dimen139
\c@unbalance=\count191
\c@collectmore=\count192
\doublecol@number=\count193
\multicoltolerance=\count194
\multicolpretolerance=\count195
\full@width=\dimen140
\page@free=\dimen141
\premulticols=\dimen142
\postmulticols=\dimen143
\multicolsep=\skip49
\multicolbaselineskip=\skip50
\partial@page=\box51
\last@line=\box52
\maxbalancingoverflow=\dimen144
\mult@rightbox=\box53
\mult@grightbox=\box54
\mult@gfirstbox=\box55
\mult@firstbox=\box56
\@tempa=\box57
\@tempa=\box58
\@tempa=\box59
\@tempa=\box60
\@tempa=\box61
\@tempa=\box62
\@tempa=\box63
\@tempa=\box64
\@tempa=\box65
\@tempa=\box66
\@tempa=\box67
\@tempa=\box68
\@tempa=\box69
\@tempa=\box70
\@tempa=\box71
\@tempa=\box72
\@tempa=\box73
\@tempa=\box74
\@tempa=\box75
\@tempa=\box76
\@tempa=\box77
\@tempa=\box78
\@tempa=\box79
\@tempa=\box80
\@tempa=\box81
\@tempa=\box82
\@tempa=\box83
\@tempa=\box84
\@tempa=\box85
\@tempa=\box86
\@tempa=\box87
\@tempa=\box88
\@tempa=\box89
\@tempa=\box90
\@tempa=\box91
\@tempa=\box92
\@tempa=\box93
\c@minrows=\count196
\c@columnbadness=\count197
\c@finalcolumnbadness=\count198
\last@try=\dimen145
\multicolovershoot=\dimen146
\multicolundershoot=\dimen147
\mult@nat@firstbox=\box94
\colbreak@box=\box95
\mc@col@check@num=\count199
)
(c:/texlive/2021/texmf-dist/tex/latex/oberdiek/aliascnt.sty
Package: aliascnt 2018/09/07 v1.5 Alias counters (HO)
)
\c@chapter=\count266
LaTeX Font Info:    Redeclaring math symbol \Gamma on input line 362.
LaTeX Font Info:    Redeclaring math symbol \Delta on input line 363.
LaTeX Font Info:    Redeclaring math symbol \Theta on input line 364.
LaTeX Font Info:    Redeclaring math symbol \Lambda on input line 365.
LaTeX Font Info:    Redeclaring math symbol \Xi on input line 366.
LaTeX Font Info:    Redeclaring math symbol \Pi on input line 367.
LaTeX Font Info:    Redeclaring math symbol \Sigma on input line 368.
LaTeX Font Info:    Redeclaring math symbol \Upsilon on input line 369.
LaTeX Font Info:    Redeclaring math symbol \Phi on input line 370.
LaTeX Font Info:    Redeclaring math symbol \Psi on input line 371.
LaTeX Font Info:    Redeclaring math symbol \Omega on input line 372.
\tocchpnum=\dimen148
\tocsecnum=\dimen149
\tocsectotal=\dimen150
\tocsubsecnum=\dimen151
\tocsubsectotal=\dimen152
\tocsubsubsecnum=\dimen153
\tocsubsubsectotal=\dimen154
\tocparanum=\dimen155
\tocparatotal=\dimen156
\tocsubparanum=\dimen157
\@tempcntc=\count267
\fnindent=\dimen158
\c@@inst=\count268
\c@@auth=\count269
\c@auco=\count270
\instindent=\dimen159
\authrun=\box96
\authorrunning=\toks16
\tocauthor=\toks17
\titrun=\box97
\titlerunning=\toks18
\toctitle=\toks19
\c@theorem=\count271
\c@case=\count272
\c@conjecture=\count273
\c@corollary=\count274
\c@definition=\count275
\c@example=\count276
\c@exercise=\count277
\c@lemma=\count278
\c@note=\count279
\c@problem=\count280
\c@property=\count281
\c@proposition=\count282
\c@question=\count283
\c@solution=\count284
\c@remark=\count285
\headlineindent=\dimen160
)
(c:/texlive/2021/texmf-dist/tex/latex/base/fontenc.sty
Package: fontenc 2021/04/29 v2.0v Standard LaTeX package
)
(c:/texlive/2021/texmf-dist/tex/latex/graphics/graphicx.sty
Package: graphicx 2020/12/05 v1.2c Enhanced LaTeX Graphics (DPC,SPQR)

(c:/texlive/2021/texmf-dist/tex/latex/graphics/keyval.sty
Package: keyval 2014/10/28 v1.15 key=value parser (DPC)
\KV@toks@=\toks20
)
(c:/texlive/2021/texmf-dist/tex/latex/graphics/graphics.sty
Package: graphics 2021/03/04 v1.4d Standard LaTeX Graphics (DPC,SPQR)

(c:/texlive/2021/texmf-dist/tex/latex/graphics/trig.sty
Package: trig 2016/01/03 v1.10 sin cos tan (DPC)
)
(c:/texlive/2021/texmf-dist/tex/latex/graphics-cfg/graphics.cfg
File: graphics.cfg 2016/06/04 v1.11 sample graphics configuration
)
Package graphics Info: Driver file: pdftex.def on input line 107.

(c:/texlive/2021/texmf-dist/tex/latex/graphics-def/pdftex.def
File: pdftex.def 2020/10/05 v1.2a Graphics/color driver for pdftex
))
\Gin@req@height=\dimen161
\Gin@req@width=\dimen162
)
(c:/texlive/2021/texmf-dist/tex/latex/amsmath/amsmath.sty
Package: amsmath 2021/04/20 v2.17j AMS math features
\@mathmargin=\skip51

For additional information on amsmath, use the `?' option.
(c:/texlive/2021/texmf-dist/tex/latex/amsmath/amstext.sty
Package: amstext 2000/06/29 v2.01 AMS text

(c:/texlive/2021/texmf-dist/tex/latex/amsmath/amsgen.sty
File: amsgen.sty 1999/11/30 v2.0 generic functions
\@emptytoks=\toks21
\ex@=\dimen163
))
(c:/texlive/2021/texmf-dist/tex/latex/amsmath/amsbsy.sty
Package: amsbsy 1999/11/29 v1.2d Bold Symbols
\pmbraise@=\dimen164
)
(c:/texlive/2021/texmf-dist/tex/latex/amsmath/amsopn.sty
Package: amsopn 2016/03/08 v2.02 operator names
)
\inf@bad=\count286
LaTeX Info: Redefining \frac on input line 234.
\uproot@=\count287
\leftroot@=\count288
LaTeX Info: Redefining \overline on input line 399.
\classnum@=\count289
\DOTSCASE@=\count290
LaTeX Info: Redefining \ldots on input line 496.
LaTeX Info: Redefining \dots on input line 499.
LaTeX Info: Redefining \cdots on input line 620.
\Mathstrutbox@=\box98
\strutbox@=\box99
\big@size=\dimen165
LaTeX Font Info:    Redeclaring font encoding OML on input line 743.
LaTeX Font Info:    Redeclaring font encoding OMS on input line 744.
\macc@depth=\count291
\c@MaxMatrixCols=\count292
\dotsspace@=\muskip16
\c@parentequation=\count293
\dspbrk@lvl=\count294
\tag@help=\toks22
\row@=\count295
\column@=\count296
\maxfields@=\count297
\andhelp@=\toks23
\eqnshift@=\dimen166
\alignsep@=\dimen167
\tagshift@=\dimen168
\tagwidth@=\dimen169
\totwidth@=\dimen170
\lineht@=\dimen171
\@envbody=\toks24
\multlinegap=\skip52
\multlinetaggap=\skip53
\mathdisplay@stack=\toks25
LaTeX Info: Redefining \[ on input line 2923.
LaTeX Info: Redefining \] on input line 2924.
)
(c:/texlive/2021/texmf-dist/tex/latex/amsfonts/amssymb.sty
Package: amssymb 2013/01/14 v3.01 AMS font symbols

(c:/texlive/2021/texmf-dist/tex/latex/amsfonts/amsfonts.sty
Package: amsfonts 2013/01/14 v3.01 Basic AMSFonts support
\symAMSa=\mathgroup4
\symAMSb=\mathgroup5
LaTeX Font Info:    Redeclaring math symbol \hbar on input line 98.
LaTeX Font Info:    Overwriting math alphabet `\mathfrak' in version `bold'
(Font)                  U/euf/m/n --> U/euf/b/n on input line 106.
))
(c:/texlive/2021/texmf-dist/tex/latex/graphics/color.sty
Package: color 2020/02/24 v1.2b Standard LaTeX Color (DPC)

(c:/texlive/2021/texmf-dist/tex/latex/graphics-cfg/color.cfg
File: color.cfg 2016/01/02 v1.6 sample color configuration
)
Package color Info: Driver file: pdftex.def on input line 149.
)
(c:/texlive/2021/texmf-dist/tex/latex/algorithms/algorithm.sty
Package: algorithm 2009/08/24 v0.1 Document Style `algorithm' - floating enviro
nment

(c:/texlive/2021/texmf-dist/tex/latex/float/float.sty
Package: float 2001/11/08 v1.3d Float enhancements (AL)
\c@float@type=\count298
\float@exts=\toks26
\float@box=\box100
\@float@everytoks=\toks27
\@floatcapt=\box101
)
(c:/texlive/2021/texmf-dist/tex/latex/base/ifthen.sty
Package: ifthen 2020/11/24 v1.1c Standard LaTeX ifthen package (DPC)
)
\@float@every@algorithm=\toks28
\c@algorithm=\count299
)
(c:/texlive/2021/texmf-dist/tex/latex/algorithmicx/algpseudocode.sty
Package: algpseudocode 

(c:/texlive/2021/texmf-dist/tex/latex/algorithmicx/algorithmicx.sty
Package: algorithmicx 2005/04/27 v1.2 Algorithmicx

Document Style algorithmicx 1.2 - a greatly improved `algorithmic' style
\c@ALG@line=\count300
\c@ALG@rem=\count301
\c@ALG@nested=\count302
\ALG@tlm=\skip54
\ALG@thistlm=\skip55
\c@ALG@Lnr=\count303
\c@ALG@blocknr=\count304
\c@ALG@storecount=\count305
\c@ALG@tmpcounter=\count306
\ALG@tmplength=\skip56
)
Document Style - pseudocode environments for use with the `algorithmicx' style
) (c:/texlive/2021/texmf-dist/tex/latex/multirow/multirow.sty
Package: multirow 2021/03/15 v2.8 Span multiple rows of a table
\multirow@colwidth=\skip57
\multirow@cntb=\count307
\multirow@dima=\skip58
\bigstrutjot=\dimen172
)
(c:/texlive/2021/texmf-dist/tex/latex/hyperref/hyperref.sty
Package: hyperref 2021-06-07 v7.00m Hypertext links for LaTeX

(c:/texlive/2021/texmf-dist/tex/generic/ltxcmds/ltxcmds.sty
Package: ltxcmds 2020-05-10 v1.25 LaTeX kernel commands for general use (HO)
)
(c:/texlive/2021/texmf-dist/tex/generic/iftex/iftex.sty
Package: iftex 2020/03/06 v1.0d TeX engine tests
)
(c:/texlive/2021/texmf-dist/tex/generic/pdftexcmds/pdftexcmds.sty
Package: pdftexcmds 2020-06-27 v0.33 Utility functions of pdfTeX for LuaTeX (HO
)

(c:/texlive/2021/texmf-dist/tex/generic/infwarerr/infwarerr.sty
Package: infwarerr 2019/12/03 v1.5 Providing info/warning/error messages (HO)
)
Package pdftexcmds Info: \pdf@primitive is available.
Package pdftexcmds Info: \pdf@ifprimitive is available.
Package pdftexcmds Info: \pdfdraftmode found.
)
(c:/texlive/2021/texmf-dist/tex/generic/kvsetkeys/kvsetkeys.sty
Package: kvsetkeys 2019/12/15 v1.18 Key value parser (HO)
)
(c:/texlive/2021/texmf-dist/tex/generic/kvdefinekeys/kvdefinekeys.sty
Package: kvdefinekeys 2019-12-19 v1.6 Define keys (HO)
)
(c:/texlive/2021/texmf-dist/tex/generic/pdfescape/pdfescape.sty
Package: pdfescape 2019/12/09 v1.15 Implements pdfTeX's escape features (HO)
)
(c:/texlive/2021/texmf-dist/tex/latex/hycolor/hycolor.sty
Package: hycolor 2020-01-27 v1.10 Color options for hyperref/bookmark (HO)
)
(c:/texlive/2021/texmf-dist/tex/latex/letltxmacro/letltxmacro.sty
Package: letltxmacro 2019/12/03 v1.6 Let assignment for LaTeX macros (HO)
)
(c:/texlive/2021/texmf-dist/tex/latex/auxhook/auxhook.sty
Package: auxhook 2019-12-17 v1.6 Hooks for auxiliary files (HO)
)
(c:/texlive/2021/texmf-dist/tex/latex/kvoptions/kvoptions.sty
Package: kvoptions 2020-10-07 v3.14 Key value format for package options (HO)
)
\@linkdim=\dimen173
\Hy@linkcounter=\count308
\Hy@pagecounter=\count309

(c:/texlive/2021/texmf-dist/tex/latex/hyperref/pd1enc.def
File: pd1enc.def 2021-06-07 v7.00m Hyperref: PDFDocEncoding definition (HO)
Now handling font encoding PD1 ...
... no UTF-8 mapping file for font encoding PD1
)
(c:/texlive/2021/texmf-dist/tex/latex/hyperref/hyperref-langpatches.def
File: hyperref-langpatches.def 2021-06-07 v7.00m Hyperref: patches for babel la
nguages
)
(c:/texlive/2021/texmf-dist/tex/generic/intcalc/intcalc.sty
Package: intcalc 2019/12/15 v1.3 Expandable calculations with integers (HO)
)
(c:/texlive/2021/texmf-dist/tex/generic/etexcmds/etexcmds.sty
Package: etexcmds 2019/12/15 v1.7 Avoid name clashes with e-TeX commands (HO)
)
\Hy@SavedSpaceFactor=\count310

(c:/texlive/2021/texmf-dist/tex/latex/hyperref/puenc.def
File: puenc.def 2021-06-07 v7.00m Hyperref: PDF Unicode definition (HO)
Now handling font encoding PU ...
... no UTF-8 mapping file for font encoding PU
)
Package hyperref Info: Hyper figures OFF on input line 4192.
Package hyperref Info: Link nesting OFF on input line 4197.
Package hyperref Info: Hyper index ON on input line 4200.
Package hyperref Info: Plain pages OFF on input line 4207.
Package hyperref Info: Backreferencing OFF on input line 4212.
Package hyperref Info: Implicit mode ON; LaTeX internals redefined.
Package hyperref Info: Bookmarks ON on input line 4445.
\c@Hy@tempcnt=\count311

(c:/texlive/2021/texmf-dist/tex/latex/url/url.sty
\Urlmuskip=\muskip17
Package: url 2013/09/16  ver 3.4  Verb mode for urls, etc.
)
LaTeX Info: Redefining \url on input line 4804.
\XeTeXLinkMargin=\dimen174

(c:/texlive/2021/texmf-dist/tex/generic/bitset/bitset.sty
Package: bitset 2019/12/09 v1.3 Handle bit-vector datatype (HO)

(c:/texlive/2021/texmf-dist/tex/generic/bigintcalc/bigintcalc.sty
Package: bigintcalc 2019/12/15 v1.5 Expandable calculations on big integers (HO
)
))
\Fld@menulength=\count312
\Field@Width=\dimen175
\Fld@charsize=\dimen176
Package hyperref Info: Hyper figures OFF on input line 6076.
Package hyperref Info: Link nesting OFF on input line 6081.
Package hyperref Info: Hyper index ON on input line 6084.
Package hyperref Info: backreferencing OFF on input line 6091.
Package hyperref Info: Link coloring OFF on input line 6096.
Package hyperref Info: Link coloring with OCG OFF on input line 6101.
Package hyperref Info: PDF/A mode OFF on input line 6106.
LaTeX Info: Redefining \ref on input line 6146.
LaTeX Info: Redefining \pageref on input line 6150.

(c:/texlive/2021/texmf-dist/tex/latex/base/atbegshi-ltx.sty
Package: atbegshi-ltx 2021/01/10 v1.0c Emulation of the original atbegshi
package with kernel methods
)
\Hy@abspage=\count313
\c@Item=\count314
\c@Hfootnote=\count315
)
Package hyperref Info: Driver (autodetected): hpdftex.

(c:/texlive/2021/texmf-dist/tex/latex/hyperref/hpdftex.def
File: hpdftex.def 2021-06-07 v7.00m Hyperref driver for pdfTeX

(c:/texlive/2021/texmf-dist/tex/latex/base/atveryend-ltx.sty
Package: atveryend-ltx 2020/08/19 v1.0a Emulation of the original atvery packag
e
with kernel methods
)
\Fld@listcount=\count316
\c@bookmark@seq@number=\count317

(c:/texlive/2021/texmf-dist/tex/latex/rerunfilecheck/rerunfilecheck.sty
Package: rerunfilecheck 2019/12/05 v1.9 Rerun checks for auxiliary files (HO)

(c:/texlive/2021/texmf-dist/tex/generic/uniquecounter/uniquecounter.sty
Package: uniquecounter 2019/12/15 v1.4 Provide unlimited unique counter (HO)
)
Package uniquecounter Info: New unique counter `rerunfilecheck' on input line 2
86.
)
\Hy@SectionHShift=\skip59
)
(c:/texlive/2021/texmf-dist/tex/latex/xcolor/xcolor.sty
Package: xcolor 2016/05/11 v2.12 LaTeX color extensions (UK)

(c:/texlive/2021/texmf-dist/tex/latex/graphics-cfg/color.cfg
File: color.cfg 2016/01/02 v1.6 sample color configuration
)
Package xcolor Info: Driver file: pdftex.def on input line 225.
LaTeX Info: Redefining \color on input line 709.
Package xcolor Info: Model `cmy' substituted by `cmy0' on input line 1348.
Package xcolor Info: Model `hsb' substituted by `rgb' on input line 1352.
Package xcolor Info: Model `RGB' extended on input line 1364.
Package xcolor Info: Model `HTML' substituted by `rgb' on input line 1366.
Package xcolor Info: Model `Hsb' substituted by `hsb' on input line 1367.
Package xcolor Info: Model `tHsb' substituted by `hsb' on input line 1368.
Package xcolor Info: Model `HSB' substituted by `hsb' on input line 1369.
Package xcolor Info: Model `Gray' substituted by `gray' on input line 1370.
Package xcolor Info: Model `wave' substituted by `hsb' on input line 1371.
)
(c:/texlive/2021/texmf-dist/tex/latex/colortbl/colortbl.sty
Package: colortbl 2020/01/04 v1.0e Color table columns (DPC)

(c:/texlive/2021/texmf-dist/tex/latex/tools/array.sty
Package: array 2021/04/20 v2.5e Tabular extension package (FMi)
\col@sep=\dimen177
\ar@mcellbox=\box102
\extrarowheight=\dimen178
\NC@list=\toks29
\extratabsurround=\skip60
\backup@length=\skip61
\ar@cellbox=\box103
)
\everycr=\toks30
\minrowclearance=\skip62
)
(c:/texlive/2021/texmf-dist/tex/latex/makecell/makecell.sty
Package: makecell 2009/08/03 V0.1e Managing of Tab Column Heads and Cells
\rotheadsize=\dimen179
\c@nlinenum=\count318
\TeXr@lab=\toks31
)
(c:/texlive/2021/texmf-dist/tex/latex/placeins/placeins.sty
Package: placeins 2005/04/18  v 2.2
)
Package hyperref Info: Option `colorlinks' set `true' on input line 31.


Package array Warning: Redefining primitive column b on input line 39.

(c:/texlive/2021/texmf-dist/tex/latex/l3backend/l3backend-pdftex.def
File: l3backend-pdftex.def 2021-05-07 L3 backend support: PDF output (pdfTeX)
\l__color_backend_stack_int=\count319
\l__pdf_internal_box=\box104
)
(./0895_supp.aux)
\openout1 = `0895_supp.aux'.

LaTeX Font Info:    Checking defaults for OML/cmm/m/it on input line 49.
LaTeX Font Info:    ... okay on input line 49.
LaTeX Font Info:    Checking defaults for OMS/cmsy/m/n on input line 49.
LaTeX Font Info:    ... okay on input line 49.
LaTeX Font Info:    Checking defaults for OT1/cmr/m/n on input line 49.
LaTeX Font Info:    ... okay on input line 49.
LaTeX Font Info:    Checking defaults for T1/cmr/m/n on input line 49.
LaTeX Font Info:    ... okay on input line 49.
LaTeX Font Info:    Checking defaults for TS1/cmr/m/n on input line 49.
LaTeX Font Info:    ... okay on input line 49.
LaTeX Font Info:    Checking defaults for OMX/cmex/m/n on input line 49.
LaTeX Font Info:    ... okay on input line 49.
LaTeX Font Info:    Checking defaults for U/cmr/m/n on input line 49.
LaTeX Font Info:    ... okay on input line 49.
LaTeX Font Info:    Checking defaults for PD1/pdf/m/n on input line 49.
LaTeX Font Info:    ... okay on input line 49.
LaTeX Font Info:    Checking defaults for PU/pdf/m/n on input line 49.
LaTeX Font Info:    ... okay on input line 49.

(c:/texlive/2021/texmf-dist/tex/context/base/mkii/supp-pdf.mkii
[Loading MPS to PDF converter (version 2006.09.02).]
\scratchcounter=\count320
\scratchdimen=\dimen180
\scratchbox=\box105
\nofMPsegments=\count321
\nofMParguments=\count322
\everyMPshowfont=\toks32
\MPscratchCnt=\count323
\MPscratchDim=\dimen181
\MPnumerator=\count324
\makeMPintoPDFobject=\count325
\everyMPtoPDFconversion=\toks33
) (c:/texlive/2021/texmf-dist/tex/latex/epstopdf-pkg/epstopdf-base.sty
Package: epstopdf-base 2020-01-24 v2.11 Base part for package epstopdf
Package epstopdf-base Info: Redefining graphics rule for `.eps' on input line 4
85.

(c:/texlive/2021/texmf-dist/tex/latex/latexconfig/epstopdf-sys.cfg
File: epstopdf-sys.cfg 2010/07/13 v1.3 Configuration of (r)epstopdf for TeX Liv
e
))
Package hyperref Info: Link coloring ON on input line 49.

(c:/texlive/2021/texmf-dist/tex/latex/hyperref/nameref.sty
Package: nameref 2021-04-02 v2.47 Cross-referencing by name of section

(c:/texlive/2021/texmf-dist/tex/latex/refcount/refcount.sty
Package: refcount 2019/12/15 v3.6 Data extraction from label references (HO)
)
(c:/texlive/2021/texmf-dist/tex/generic/gettitlestring/gettitlestring.sty
Package: gettitlestring 2019/12/15 v1.6 Cleanup title references (HO)
)
\c@section@level=\count326
)
LaTeX Info: Redefining \ref on input line 49.
LaTeX Info: Redefining \pageref on input line 49.
LaTeX Info: Redefining \nameref on input line 49.

(./0895_supp.out) (./0895_supp.out)
\@outlinefile=\write3
\openout3 = `0895_supp.out'.

LaTeX Font Info:    Trying to load font information for U+msa on input line 64.


(c:/texlive/2021/texmf-dist/tex/latex/amsfonts/umsa.fd
File: umsa.fd 2013/01/14 v3.01 AMS symbols A
)
LaTeX Font Info:    Trying to load font information for U+msb on input line 64.


(c:/texlive/2021/texmf-dist/tex/latex/amsfonts/umsb.fd
File: umsb.fd 2013/01/14 v3.01 AMS symbols B
) [1


{c:/texlive/2021/texmf-var/fonts/map/pdftex/updmap/pdftex.map}] [2]
Package epstopdf Info: Source file: <supple_figs/ns_s.eps>
(epstopdf)                    date: 2022-07-13 22:03:34
(epstopdf)                    size: 3852826 bytes
(epstopdf)             Output file: <supple_figs/ns_s-eps-converted-to.pdf>
(epstopdf)                    date: 2022-07-13 23:04:10
(epstopdf)                    size: 298948 bytes
(epstopdf)             Command: <repstopdf --outfile=supple_figs/ns_s-eps-conve
rted-to.pdf supple_figs/ns_s.eps>
(epstopdf)             \includegraphics on input line 200.
Package epstopdf Info: Output file is already uptodate.
<supple_figs/ns_s-eps-converted-to.pdf, id=74, 851.18pt x 298.11375pt>
File: supple_figs/ns_s-eps-converted-to.pdf Graphic file (type pdf)
<use supple_figs/ns_s-eps-converted-to.pdf>
Package pdftex.def Info: supple_figs/ns_s-eps-converted-to.pdf  used on input l
ine 200.
(pdftex.def)             Requested size: 343.6542pt x 120.3624pt.


LaTeX Warning: `h' float specifier changed to `ht'.

Package epstopdf Info: Source file: <supple_figs/s_ns.eps>
(epstopdf)                    date: 2022-07-13 22:02:41
(epstopdf)                    size: 3879846 bytes
(epstopdf)             Output file: <supple_figs/s_ns-eps-converted-to.pdf>
(epstopdf)                    date: 2022-07-13 23:04:11
(epstopdf)                    size: 307329 bytes
(epstopdf)             Command: <repstopdf --outfile=supple_figs/s_ns-eps-conve
rted-to.pdf supple_figs/s_ns.eps>
(epstopdf)             \includegraphics on input line 208.
Package epstopdf Info: Output file is already uptodate.
<supple_figs/s_ns-eps-converted-to.pdf, id=75, 851.18pt x 298.11375pt>
File: supple_figs/s_ns-eps-converted-to.pdf Graphic file (type pdf)
<use supple_figs/s_ns-eps-converted-to.pdf>
Package pdftex.def Info: supple_figs/s_ns-eps-converted-to.pdf  used on input l
ine 208.
(pdftex.def)             Requested size: 343.6542pt x 120.3624pt.

LaTeX Warning: `h' float specifier changed to `ht'.

Package epstopdf Info: Source file: <supple_figs/ns_s_rand.eps>
(epstopdf)                    date: 2022-07-14 13:06:04
(epstopdf)                    size: 3905030 bytes
(epstopdf)             Output file: <supple_figs/ns_s_rand-eps-converted-to.pdf
>
(epstopdf)                    date: 2022-07-14 13:11:50
(epstopdf)                    size: 303813 bytes
(epstopdf)             Command: <repstopdf --outfile=supple_figs/ns_s_rand-eps-
converted-to.pdf supple_figs/ns_s_rand.eps>
(epstopdf)             \includegraphics on input line 216.
Package epstopdf Info: Output file is already uptodate.
<supple_figs/ns_s_rand-eps-converted-to.pdf, id=76, 851.18pt x 298.11375pt>
File: supple_figs/ns_s_rand-eps-converted-to.pdf Graphic file (type pdf)
<use supple_figs/ns_s_rand-eps-converted-to.pdf>
Package pdftex.def Info: supple_figs/ns_s_rand-eps-converted-to.pdf  used on in
put line 216.
(pdftex.def)             Requested size: 343.6542pt x 120.3624pt.

LaTeX Warning: `h' float specifier changed to `ht'.

Package epstopdf Info: Source file: <supple_figs/ng_g.eps>
(epstopdf)                    date: 2022-07-13 22:10:16
(epstopdf)                    size: 3857542 bytes
(epstopdf)             Output file: <supple_figs/ng_g-eps-converted-to.pdf>
(epstopdf)                    date: 2022-07-13 23:04:13
(epstopdf)                    size: 282639 bytes
(epstopdf)             Command: <repstopdf --outfile=supple_figs/ng_g-eps-conve
rted-to.pdf supple_figs/ng_g.eps>
(epstopdf)             \includegraphics on input line 228.
Package epstopdf Info: Output file is already uptodate.
<supple_figs/ng_g-eps-converted-to.pdf, id=77, 851.18pt x 298.11375pt>
File: supple_figs/ng_g-eps-converted-to.pdf Graphic file (type pdf)
<use supple_figs/ng_g-eps-converted-to.pdf>
Package pdftex.def Info: supple_figs/ng_g-eps-converted-to.pdf  used on input l
ine 228.
(pdftex.def)             Requested size: 343.6542pt x 120.3624pt.

LaTeX Warning: `h' float specifier changed to `ht'.

Package epstopdf Info: Source file: <supple_figs/g_ng.eps>
(epstopdf)                    date: 2022-07-13 22:09:21
(epstopdf)                    size: 3882282 bytes
(epstopdf)             Output file: <supple_figs/g_ng-eps-converted-to.pdf>
(epstopdf)                    date: 2022-07-13 23:04:15
(epstopdf)                    size: 301520 bytes
(epstopdf)             Command: <repstopdf --outfile=supple_figs/g_ng-eps-conve
rted-to.pdf supple_figs/g_ng.eps>
(epstopdf)             \includegraphics on input line 236.
Package epstopdf Info: Output file is already uptodate.
<supple_figs/g_ng-eps-converted-to.pdf, id=78, 852.18375pt x 298.11375pt>
File: supple_figs/g_ng-eps-converted-to.pdf Graphic file (type pdf)
<use supple_figs/g_ng-eps-converted-to.pdf>
Package pdftex.def Info: supple_figs/g_ng-eps-converted-to.pdf  used on input l
ine 236.
(pdftex.def)             Requested size: 343.6542pt x 120.22139pt.

LaTeX Warning: `h' float specifier changed to `ht'.

Package epstopdf Info: Source file: <supple_figs/nm_m.eps>
(epstopdf)                    date: 2022-07-13 22:06:46
(epstopdf)                    size: 3700054 bytes
(epstopdf)             Output file: <supple_figs/nm_m-eps-converted-to.pdf>
(epstopdf)                    date: 2022-07-13 23:04:17
(epstopdf)                    size: 293255 bytes
(epstopdf)             Command: <repstopdf --outfile=supple_figs/nm_m-eps-conve
rted-to.pdf supple_figs/nm_m.eps>
(epstopdf)             \includegraphics on input line 247.
Package epstopdf Info: Output file is already uptodate.
<supple_figs/nm_m-eps-converted-to.pdf, id=79, 851.18pt x 298.11375pt>
File: supple_figs/nm_m-eps-converted-to.pdf Graphic file (type pdf)
<use supple_figs/nm_m-eps-converted-to.pdf>
Package pdftex.def Info: supple_figs/nm_m-eps-converted-to.pdf  used on input l
ine 247.
(pdftex.def)             Requested size: 343.6542pt x 120.3624pt.

LaTeX Warning: `h' float specifier changed to `ht'.

Package epstopdf Info: Source file: <supple_figs/m_nm.eps>
(epstopdf)                    date: 2022-07-13 22:05:52
(epstopdf)                    size: 3703078 bytes
(epstopdf)             Output file: <supple_figs/m_nm-eps-converted-to.pdf>
(epstopdf)                    date: 2022-07-13 23:04:19
(epstopdf)                    size: 279985 bytes
(epstopdf)             Command: <repstopdf --outfile=supple_figs/m_nm-eps-conve
rted-to.pdf supple_figs/m_nm.eps>
(epstopdf)             \includegraphics on input line 255.
Package epstopdf Info: Output file is already uptodate.
<supple_figs/m_nm-eps-converted-to.pdf, id=80, 851.18pt x 298.11375pt>
File: supple_figs/m_nm-eps-converted-to.pdf Graphic file (type pdf)
<use supple_figs/m_nm-eps-converted-to.pdf>
Package pdftex.def Info: supple_figs/m_nm-eps-converted-to.pdf  used on input l
ine 255.
(pdftex.def)             Requested size: 343.6542pt x 120.3624pt.

LaTeX Warning: `h' float specifier changed to `ht'.

Package epstopdf Info: Source file: <supple_figs/f_m.eps>
(epstopdf)                    date: 2022-07-13 22:12:14
(epstopdf)                    size: 3837130 bytes
(epstopdf)             Output file: <supple_figs/f_m-eps-converted-to.pdf>
(epstopdf)                    date: 2022-07-13 23:04:21
(epstopdf)                    size: 293809 bytes
(epstopdf)             Command: <repstopdf --outfile=supple_figs/f_m-eps-conver
ted-to.pdf supple_figs/f_m.eps>
(epstopdf)             \includegraphics on input line 266.
Package epstopdf Info: Output file is already uptodate.
<supple_figs/f_m-eps-converted-to.pdf, id=81, 851.18pt x 298.11375pt>
File: supple_figs/f_m-eps-converted-to.pdf Graphic file (type pdf)
<use supple_figs/f_m-eps-converted-to.pdf>
Package pdftex.def Info: supple_figs/f_m-eps-converted-to.pdf  used on input li
ne 266.
(pdftex.def)             Requested size: 343.6542pt x 120.3624pt.

LaTeX Warning: `h' float specifier changed to `ht'.

Package epstopdf Info: Source file: <supple_figs/m_f.eps>
(epstopdf)                    date: 2022-07-13 22:11:25
(epstopdf)                    size: 3854998 bytes
(epstopdf)             Output file: <supple_figs/m_f-eps-converted-to.pdf>
(epstopdf)                    date: 2022-07-13 23:04:23
(epstopdf)                    size: 302393 bytes
(epstopdf)             Command: <repstopdf --outfile=supple_figs/m_f-eps-conver
ted-to.pdf supple_figs/m_f.eps>
(epstopdf)             \includegraphics on input line 274.
Package epstopdf Info: Output file is already uptodate.
<supple_figs/m_f-eps-converted-to.pdf, id=82, 851.18pt x 298.11375pt>
File: supple_figs/m_f-eps-converted-to.pdf Graphic file (type pdf)
<use supple_figs/m_f-eps-converted-to.pdf>
Package pdftex.def Info: supple_figs/m_f-eps-converted-to.pdf  used on input li
ne 274.
(pdftex.def)             Requested size: 343.6542pt x 120.3624pt.

LaTeX Warning: `h' float specifier changed to `ht'.

[3]
Package epstopdf Info: Source file: <supple_figs/smile_fail.eps>
(epstopdf)                    date: 2022-07-13 22:15:49
(epstopdf)                    size: 2115414 bytes
(epstopdf)             Output file: <supple_figs/smile_fail-eps-converted-to.pd
f>
(epstopdf)                    date: 2022-07-13 23:04:25
(epstopdf)                    size: 162310 bytes
(epstopdf)             Command: <repstopdf --outfile=supple_figs/smile_fail-eps
-converted-to.pdf supple_figs/smile_fail.eps>
(epstopdf)             \includegraphics on input line 288.
Package epstopdf Info: Output file is already uptodate.
<supple_figs/smile_fail-eps-converted-to.pdf, id=114, 617.30624pt x 221.82875pt
>
File: supple_figs/smile_fail-eps-converted-to.pdf Graphic file (type pdf)
<use supple_figs/smile_fail-eps-converted-to.pdf>
Package pdftex.def Info: supple_figs/smile_fail-eps-converted-to.pdf  used on i
nput line 288.
(pdftex.def)             Requested size: 295.05711pt x 106.02977pt.


LaTeX Warning: `h' float specifier changed to `ht'.

Package epstopdf Info: Source file: <supple_figs/glasses_fail.eps>
(epstopdf)                    date: 2022-07-13 22:23:00
(epstopdf)                    size: 2086534 bytes
(epstopdf)             Output file: <supple_figs/glasses_fail-eps-converted-to.
pdf>
(epstopdf)                    date: 2022-07-13 23:04:27
(epstopdf)                    size: 158288 bytes
(epstopdf)             Command: <repstopdf --outfile=supple_figs/glasses_fail-e
ps-converted-to.pdf supple_figs/glasses_fail.eps>
(epstopdf)             \includegraphics on input line 296.
Package epstopdf Info: Output file is already uptodate.
<supple_figs/glasses_fail-eps-converted-to.pdf, id=115, 616.3025pt x 221.82875p
t>
File: supple_figs/glasses_fail-eps-converted-to.pdf Graphic file (type pdf)
<use supple_figs/glasses_fail-eps-converted-to.pdf>
Package pdftex.def Info: supple_figs/glasses_fail-eps-converted-to.pdf  used on
 input line 296.
(pdftex.def)             Requested size: 295.05711pt x 106.20241pt.

LaTeX Warning: `h' float specifier changed to `ht'.

Package epstopdf Info: Source file: <supple_figs/mustache_fail.eps>
(epstopdf)                    date: 2022-07-13 22:24:25
(epstopdf)                    size: 2052734 bytes
(epstopdf)             Output file: <supple_figs/mustache_fail-eps-converted-to
.pdf>
(epstopdf)                    date: 2022-07-13 23:04:29
(epstopdf)                    size: 158812 bytes
(epstopdf)             Command: <repstopdf --outfile=supple_figs/mustache_fail-
eps-converted-to.pdf supple_figs/mustache_fail.eps>
(epstopdf)             \includegraphics on input line 303.
Package epstopdf Info: Output file is already uptodate.
<supple_figs/mustache_fail-eps-converted-to.pdf, id=116, 617.30624pt x 221.8287
5pt>
File: supple_figs/mustache_fail-eps-converted-to.pdf Graphic file (type pdf)
<use supple_figs/mustache_fail-eps-converted-to.pdf>
Package pdftex.def Info: supple_figs/mustache_fail-eps-converted-to.pdf  used o
n input line 303.
(pdftex.def)             Requested size: 295.05711pt x 106.02977pt.

LaTeX Warning: `h' float specifier changed to `ht'.

Package epstopdf Info: Source file: <supple_figs/gender_fail.eps>
(epstopdf)                    date: 2022-07-13 22:25:37
(epstopdf)                    size: 2087926 bytes
(epstopdf)             Output file: <supple_figs/gender_fail-eps-converted-to.p
df>
(epstopdf)                    date: 2022-07-13 23:04:31
(epstopdf)                    size: 164581 bytes
(epstopdf)             Command: <repstopdf --outfile=supple_figs/gender_fail-ep
s-converted-to.pdf supple_figs/gender_fail.eps>
(epstopdf)             \includegraphics on input line 311.
Package epstopdf Info: Output file is already uptodate.
<supple_figs/gender_fail-eps-converted-to.pdf, id=117, 617.30624pt x 221.82875p
t>
File: supple_figs/gender_fail-eps-converted-to.pdf Graphic file (type pdf)
<use supple_figs/gender_fail-eps-converted-to.pdf>
Package pdftex.def Info: supple_figs/gender_fail-eps-converted-to.pdf  used on 
input line 311.
(pdftex.def)             Requested size: 295.05711pt x 106.02977pt.

LaTeX Warning: `h' float specifier changed to `ht'.

Package epstopdf Info: Source file: <supple_figs/y_o.eps>
(epstopdf)                    date: 2022-07-13 22:26:24
(epstopdf)                    size: 3810522 bytes
(epstopdf)             Output file: <supple_figs/y_o-eps-converted-to.pdf>
(epstopdf)                    date: 2022-07-13 23:04:34
(epstopdf)                    size: 282348 bytes
(epstopdf)             Command: <repstopdf --outfile=supple_figs/y_o-eps-conver
ted-to.pdf supple_figs/y_o.eps>
(epstopdf)             \includegraphics on input line 329.
Package epstopdf Info: Output file is already uptodate.
<supple_figs/y_o-eps-converted-to.pdf, id=123, 852.18375pt x 298.11375pt>
File: supple_figs/y_o-eps-converted-to.pdf Graphic file (type pdf)
<use supple_figs/y_o-eps-converted-to.pdf>
Package pdftex.def Info: supple_figs/y_o-eps-converted-to.pdf  used on input li
ne 329.
(pdftex.def)             Requested size: 343.6542pt x 120.22139pt.

LaTeX Warning: `h' float specifier changed to `ht'.

Package epstopdf Info: Source file: <supple_figs/o_y.eps>
(epstopdf)                    date: 2022-07-13 22:27:20
(epstopdf)                    size: 5146922 bytes
(epstopdf)             Output file: <supple_figs/o_y-eps-converted-to.pdf>
(epstopdf)                    date: 2022-07-13 23:04:33
(epstopdf)                    size: 379419 bytes
(epstopdf)             Command: <repstopdf --outfile=supple_figs/o_y-eps-conver
ted-to.pdf supple_figs/o_y.eps>
(epstopdf)             \includegraphics on input line 337.
Package epstopdf Info: Output file is already uptodate.
<supple_figs/o_y-eps-converted-to.pdf, id=124, 852.18375pt x 397.485pt>
File: supple_figs/o_y-eps-converted-to.pdf Graphic file (type pdf)
<use supple_figs/o_y-eps-converted-to.pdf>
Package pdftex.def Info: supple_figs/o_y-eps-converted-to.pdf  used on input li
ne 337.
(pdftex.def)             Requested size: 343.6542pt x 160.29518pt.

LaTeX Warning: `h' float specifier changed to `ht'.

[4] [5 <./supple_figs/ns_s-eps-converted-to.pdf> <./supple_figs/s_ns-eps-conver
ted-to.pdf> <./supple_figs/ns_s_rand-eps-converted-to.pdf>] [6 <./supple_figs/n
g_g-eps-converted-to.pdf> <./supple_figs/g_ng-eps-converted-to.pdf> <./supple_f
igs/nm_m-eps-converted-to.pdf>] [7 <./supple_figs/m_nm-eps-converted-to.pdf> <.
/supple_figs/f_m-eps-converted-to.pdf> <./supple_figs/m_f-eps-converted-to.pdf>
] [8 <./supple_figs/smile_fail-eps-converted-to.pdf> <./supple_figs/glasses_fai
l-eps-converted-to.pdf> <./supple_figs/mustache_fail-eps-converted-to.pdf>]
[9 <./supple_figs/gender_fail-eps-converted-to.pdf> <./supple_figs/y_o-eps-conv
erted-to.pdf> <./supple_figs/o_y-eps-converted-to.pdf>] (./0895_supp.bbl)
[10

] (./0895_supp.aux)
Package rerunfilecheck Info: File `0895_supp.out' has not changed.
(rerunfilecheck)             Checksum: 1063CE92B726C07F9A6D396DDB99A70B;161.
 ) 
Here is how much of TeX's memory you used:
 11212 strings out of 478536
 160115 string characters out of 5854226
 520669 words of memory out of 5000000
 28914 multiletter control sequences out of 15000+600000
 414394 words of font info for 55 fonts, out of 8000000 for 9000
 1141 hyphenation exceptions out of 8191
 60i,20n,66p,1060b,340s stack positions out of 5000i,500n,10000p,200000b,80000s
{c:/texlive/2021/texmf-dist/fonts/enc/dvips/cm-super/cm-super-t1.enc}<c:/texl
ive/2021/texmf-dist/fonts/type1/public/amsfonts/cm/cmmi7.pfb><c:/texlive/2021/t
exmf-dist/fonts/type1/public/amsfonts/cm/cmsy10.pfb><c:/texlive/2021/texmf-dist
/fonts/type1/public/amsfonts/cm/cmsy9.pfb><c:/texlive/2021/texmf-dist/fonts/typ
e1/public/cm-super/sfbx0900.pfb><c:/texlive/2021/texmf-dist/fonts/type1/public/
cm-super/sfbx1000.pfb><c:/texlive/2021/texmf-dist/fonts/type1/public/cm-super/s
fbx1200.pfb><c:/texlive/2021/texmf-dist/fonts/type1/public/cm-super/sfbx1440.pf
b><c:/texlive/2021/texmf-dist/fonts/type1/public/cm-super/sfrm0900.pfb><c:/texl
ive/2021/texmf-dist/fonts/type1/public/cm-super/sfrm1000.pfb>
Output written on 0895_supp.pdf (10 pages, 4095954 bytes).
PDF statistics:
 326 PDF objects out of 1000 (max. 8388607)
 216 compressed objects within 3 object streams
 53 named destinations out of 1000 (max. 500000)
 84 words of extra memory for PDF output out of 10000 (max. 10000000)
