# Supplementary material
Source: ML conference proceedings conference paper supplement (https://openaccess.thecvf.com/content/ACCV2022/html/Cha_SAC-GAN__Face_ACCV_2022_paper.html)
Supplement: Supplementary file 1 [file Cha_SAC-GAN__Face_ACCV_2022_supplemental.pdf › 0895_supp.out]

\BOOKMARK [0][-]{chapter.1}{\376\377\000S\000u\000p\000p\000l\000e\000m\000e\000n\000t\000a\000r\000y\000\040\000M\000a\000t\000e\000r\000i\000a\000l\000s}{}% 1
