# Supplementary material
Source: ML conference proceedings conference paper supplement (https://openaccess.thecvf.com/content/ACCV2022/html/Cha_SAC-GAN__Face_ACCV_2022_paper.html)
Supplement: Supplementary file 1 [file Cha_SAC-GAN__Face_ACCV_2022_supplemental.pdf › 0895_supp.pdf]

# Supplementary Materials

Anonymous ACCV 2022 submission

Paper ID 895

## 1 Network Architecture

### 1.1 Generator

Detailed components of the encoder and the decoder in our proposed SAC-GAN are listed in Table 1. In our experiments, we set the image size as  $128 \times 128$  and style maps from  $512 \times 16 \times 16$  to  $512 \times 128 \times 128$ . Our network code is strongly motivated by implementation of L2M-GAN [1].

Input image size is set to  $3 \times 128 \times 128$  and mask has shape of  $1 \times 128 \times 128$ , which are concatenated before being entered to the encoder. The output of the encoder is  $512 \times 16 \times 16$  feature. During synthesis phase from the decoder, each layer in the decoder has modulation function for applying spatial style maps obtained from the mapper  $\mathcal{M}$  and the upsampling network. Each layer of the generator is a convolutional residual block, and the block of the encoder has  $2 \times 2$  Avg pooling function, while the block of the decoder has the function of upsampling and weight modulation. We adopted weight modulation from the implementation of StyleGAN v2 [2].

The architecture of mapper network and upsampling network are provided in Table 2. Concatenation of feature and style code is originally used in COMOD-GAN [3] and we modified it to handle spatial tensors.

### 1.2 Discriminator

We adopted multi-task discriminator from [4] without special modification but we added gradient penalty from WGAN [5] for stable convergence of training. The number of branches in the discriminator is the same as the number of attribute domains to be utilized.

## 2 Dataset Preparation

### 2.1 Images

As we mentioned in the paper text, we used wild data without alignment because there is a possibility that the spatial information will be fixed if we use aligned face images. So we cropped 202,599 images from CelebA [6] dataset using only face detector from MTCNN [7] without any alignment based on landmarks. The pixel margin value is set to 24 and if detector failed to face, we just manually cropped it from center. All images are resized to  $128 \times 128$  in dataset loader for training.

| Encoder     |     |                  |       |                             |
|-------------|-----|------------------|-------|-----------------------------|
| Block Name  | No. | Layer            | Act   | Output Size                 |
| Mask Concat | 1.  | Concat           | -     | $4 \times 128 \times 128$   |
| From RGB    | 1.  | Conv3 $\times$ 3 | -     | $128 \times 128 \times 128$ |
| Resblock 1  | 1.  | Conv3 $\times$ 3 | LReLU | $128 \times 128 \times 128$ |
|             | 2.  | Avg Pool         | -     | $128 \times 64 \times 64$   |
|             | 3.  | Conv3 $\times$ 3 | LReLU | $128 \times 64 \times 64$   |
| Resblock 2  | 1.  | Conv3 $\times$ 3 | LReLU | $256 \times 64 \times 64$   |
|             | 2.  | Avg Pool         | -     | $256 \times 32 \times 32$   |
|             | 3.  | Conv3 $\times$ 3 | LReLU | $256 \times 32 \times 32$   |
| Resblock 3  | 1.  | Conv3 $\times$ 3 | LReLU | $512 \times 32 \times 32$   |
|             | 2.  | Avg Pool         | -     | $512 \times 16 \times 16$   |
|             | 3.  | Conv3 $\times$ 3 | LReLU | $512 \times 16 \times 16$   |
| Resblock 4  | 1.  | Conv3 $\times$ 3 | LReLU | $512 \times 16 \times 16$   |
|             | 2.  | Conv3 $\times$ 3 | LReLU | $512 \times 16 \times 16$   |
| Resblock 5  | 1.  | Conv3 $\times$ 3 | LReLU | $512 \times 16 \times 16$   |
|             | 2.  | Conv3 $\times$ 3 | LReLU | $512 \times 16 \times 16$   |
| Decoder     |     |                  |       |                             |
| Block Name  | No. | Layer            | Act   | Output Size                 |
| Resblock 1  | 1.  | Conv3 $\times$ 3 | LReLU | $512 \times 16 \times 16$   |
|             | 2.  | Conv3 $\times$ 3 | LReLU | $512 \times 16 \times 16$   |
|             | 3.  | Modulation       | -     | $512 \times 16 \times 16$   |
| Resblock 2  | 1.  | Conv3 $\times$ 3 | LReLU | $512 \times 16 \times 16$   |
|             | 2.  | Conv3 $\times$ 3 | LReLU | $512 \times 16 \times 16$   |
|             | 3.  | Modulation       | -     | $512 \times 16 \times 16$   |
| Resblock 3  | 1.  | Conv3 $\times$ 3 | LReLU | $512 \times 16 \times 16$   |
|             | 2.  | Upsample         | -     | $512 \times 32 \times 32$   |
|             | 3.  | Conv3 $\times$ 3 | LReLU | $512 \times 32 \times 32$   |
|             | 4.  | Modulation       | -     | $512 \times 32 \times 32$   |
| Resblock 4  | 1.  | Conv3 $\times$ 3 | LReLU | $512 \times 32 \times 32$   |
|             | 2.  | Upsample         | -     | $512 \times 64 \times 64$   |
|             | 3.  | Conv3 $\times$ 3 | LReLU | $256 \times 64 \times 64$   |
|             | 4.  | Modulation       | -     | $256 \times 64 \times 64$   |
| Resblock 5  | 1.  | Conv3 $\times$ 3 | LReLU | $256 \times 64 \times 64$   |
|             | 2.  | Upsample         | -     | $256 \times 128 \times 128$ |
|             | 3.  | Conv3 $\times$ 3 | LReLU | $128 \times 128 \times 128$ |
|             | 4.  | Modulation       | -     | $128 \times 128 \times 128$ |
| To RGB      | 1.  | Conv3 $\times$ 3 | -     | $3 \times 128 \times 128$   |

**Table 1.** The configurations of the encoder and the decoder from SAC-GAN.

## 2.2 Masks

We prepared custom binary masks to cover face images and utilized them as fixed masks for experiments. According to target attributes, we used several fixed masks to make occlusion on some regions. For example, for the manipulation inpainting of 'mustache', we deployed a fixed mask covers nearby areas around the nose. We conducted quantitative comparisons for 'smile' attribute with mask that occludes most pixels of the face. Because our CelebA images are not aligned, there were some images that our fixed mask cannot cover all of the facial components.

For irregular masks, we adopted mask generator code from gated convolution [8]. Fig. 3 presents reconstruction outputs of image inpainting using irregular random masks for 'smile' attribute. Like fixed masks, those randomly generated irregular masks sometimes do not cover pixels related to target attributes. For example, column 7-8 images in Fig. 3 demonstrate the reconstructed output that the smiling attribute is not applied because their masks didn't cover mouth area, which is an important component for 'smile' attribute.

## 2.3 Face Recognizer

Face recognizer is employed for computation of identity preserving loss (denoted as  $\mathcal{L}_{id}$ ) between reconstructed images according to the source domain and other target domains. It extracts face feature embeddings from subject images and our inpainting network is trained by reducing the feature-space distance between embeddings generated from the same subjects. Identity preserving loss consequently guarantee images restored from any target domain maintain a same identity. We employed ArcFace [9] for training face recognizer with ResNet-50 [10] backbone network and they are trained on CASIA-WebFace dataset [11]. During the training process of our inpainting model, recognizer network is fixed (set to evaluation mode). Unlike other ArcFace open source codes using  $112 \times 112$  size of images, we modified some layers in backbone ResNet to handle  $128 \times 128$  size of images to match the size for CelebA images for the generator and the discriminator.

## 3 Succeeded Cases

In this section, we presents other successful cases using four attributes ('smile', 'glasses', 'mustache', and 'gender') in Fig. 1-2 ('smile'), Fig. 4-5 ('glasses'), Fig. 6-7 ('mustache'), and Fig. 8-9 ('gender').

## 4 Failure Cases

During experiments for various facial attributes we found some failed cases from reconstructed outputs. We presented several failed cases for four attributes in Fig. 10-13. In Fig. 10, the reconstructed mouth shape is very unnatural in both case 'smile  $\rightarrow$  non-smile' and 'non-smile  $\rightarrow$  smile'. In Fig. 11, each glass lens in

| Mapper & Upsampling Network |     |          |      |                     |
|-----------------------------|-----|----------|------|---------------------|
| Block Name                  | No. | Layer    | Act  | Output Size         |
| Linear                      | 1.  | Linear   | -    | 128                 |
|                             | 2.  | Linear   | -    | 128·16·16           |
|                             | 3.  | Reshape  | -    | 128×16×16           |
| Feature +Style Concat       | 1.  | Concat   | -    | (128+512)<br>×16×16 |
| Conv                        | 1.  | Conv1×1  | -    | 512×16×16           |
| Mapper                      | 1.  | Conv3×3  | ReLU | 512×16×16           |
|                             | 2.  | Conv3×3  | ReLU | 512×16×16           |
|                             | 3.  | Conv3×3  | ReLU | 512×16×16           |
|                             | 4.  | Conv3×3  | ReLU | 512×16×16           |
| Conv                        | 1.  | Conv3×3  | ReLU | 512×16×16           |
| Upsampling 1                | 1.  | Upsample | -    | 512×32×32           |
|                             | 2.  | Conv3×3  | ReLU | 512×32×32           |
| Upsampling 2                | 1.  | Upsample | -    | 512×64×64           |
|                             | 2.  | Conv3×3  | ReLU | 512×64×64           |
| Upsampling 3                | 1.  | Upsample | -    | 512×128×128         |
|                             | 2.  | Conv3×3  | ReLU | 512×128×128         |

**Table 2.** The configurations of the encoder and the mapping network  $\mathcal{M}$ .

synthesized images is showing different figure with each other for 'non-glasses  $\rightarrow$  glasses' and glasses are not removed completely for 'glasses  $\rightarrow$  non-glasses'. In Fig. 12, mustache still exists in the case of 'mustache  $\rightarrow$  non-mustache' and synthesized mustache is not natural or complete in the case of 'non-mustache  $\rightarrow$  mustache'. In Fig. 13, the network failed to exclude masculine attributes like mustache in the case of 'male  $\rightarrow$  female'.

#### 4.1 Application to Different Dataset

On the other hand, in some attributes, expected results didn't come out due to the problem of attributes from CelebA dataset. For example, while test for 'young  $\rightarrow$  old' shows considerably plausible outputs as shown in Fig. 15, results for 'old  $\rightarrow$  young' synthesized bad outputs as described in Fig. 14 (row 3). Since most of the faces in CelebA dataset consist of adults, the visual difference between 'young' and 'old' domains is not evident.

We employed UTK dataset [12] containing face images with various age and replaced the 'young' domain dataset with them. We collected 3,538 young face images under 14 years old and replaced previous 'young' images from CelebA with 'young' images from UTK. We provided the results in Fig. 14 (row 4) and outputs are showing considerably successful results compared with using only CelebA dataset (row 3).

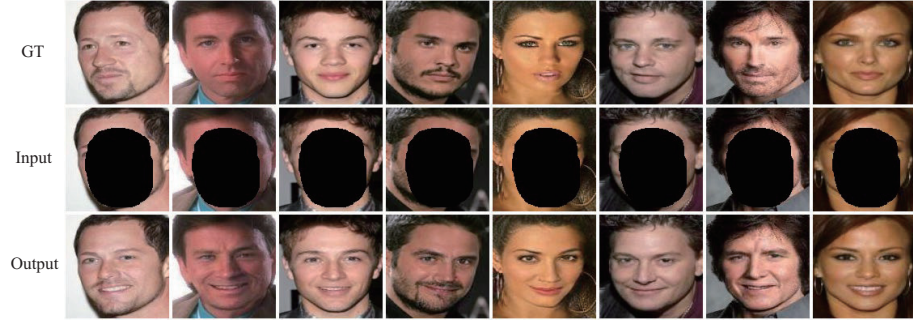

**Fig. 1.** Examples of face image inpainting with 'smile' attribute. Images are sampled from CelebA dataset. From top to bottom: original image, input image, and reconstructed result.

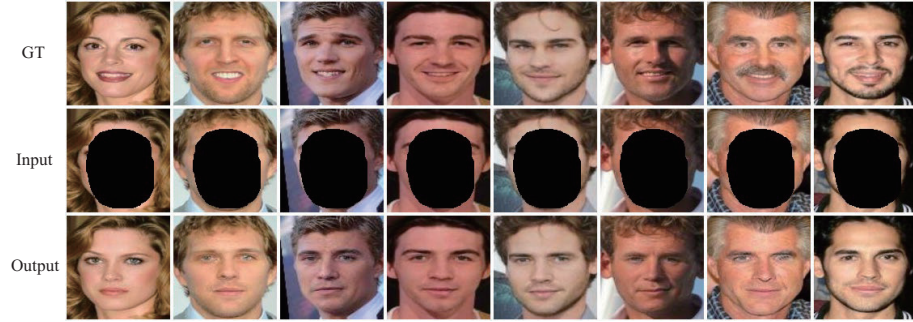

**Fig. 2.** Examples of face image inpainting with 'non-smile' attribute. Images are sampled from CelebA dataset. From top to bottom: original image, input image, and reconstructed result.

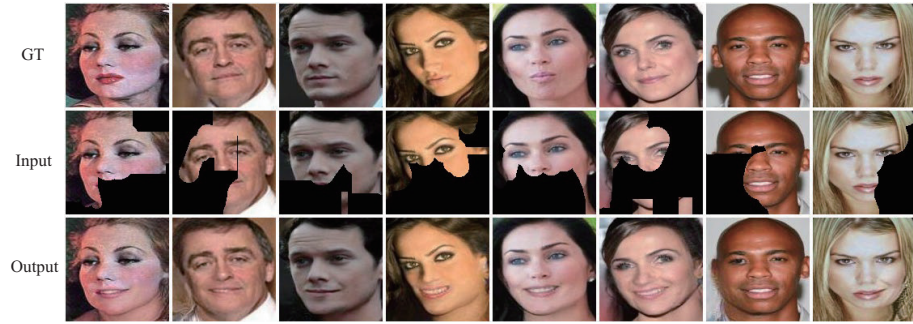

**Fig. 3.** Examples of face image inpainting with 'smile' attribute and irregular masks. Images are sampled from CelebA dataset. From top to bottom: original image, input image, and reconstructed result. column 1-6 show successfully reconstructed output with 'smile' attribute but in cases of column 7-8, the target 'smile' attribute was not applied because the mask did not cover important part for the expected attribute.

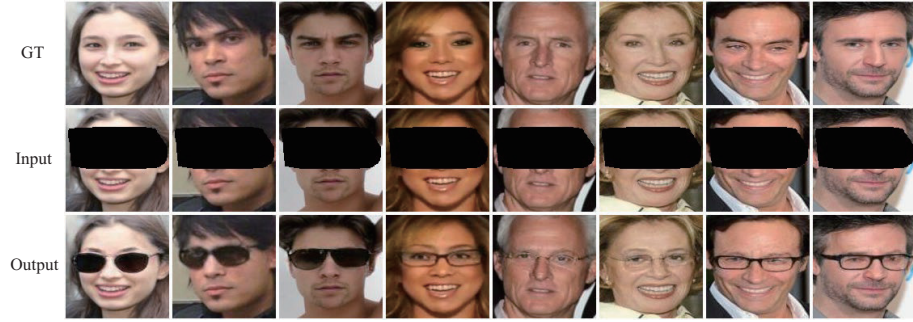

**Fig. 4.** Examples of face image inpainting with 'glasses' attribute. Images are sampled from CelebA dataset. From top to bottom: original image, input image, and reconstructed result.

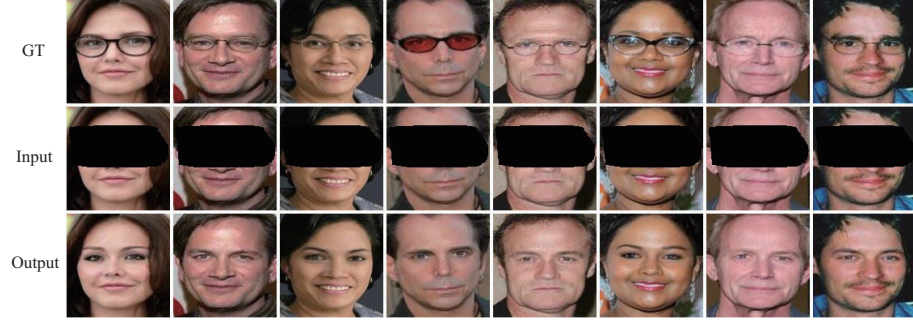

**Fig. 5.** Examples of face image inpainting with 'non-glasses' attribute. Images are sampled from CelebA dataset. From top to bottom: original image, input image, and reconstructed result.

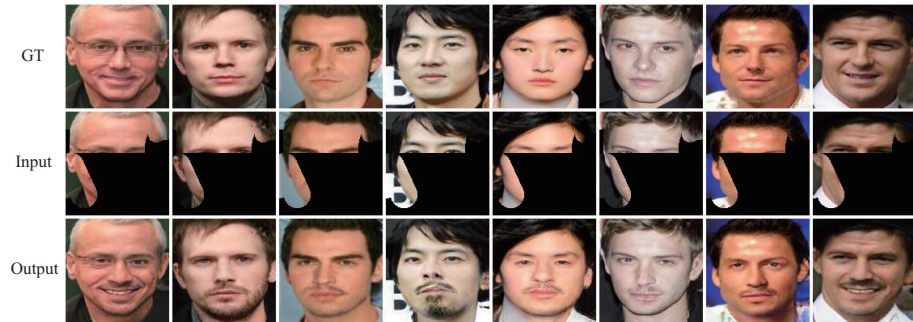

**Fig. 6.** Examples of face image inpainting with 'mustache' attribute. Images are sampled from CelebA dataset. From top to bottom: original image, input image, and reconstructed result.

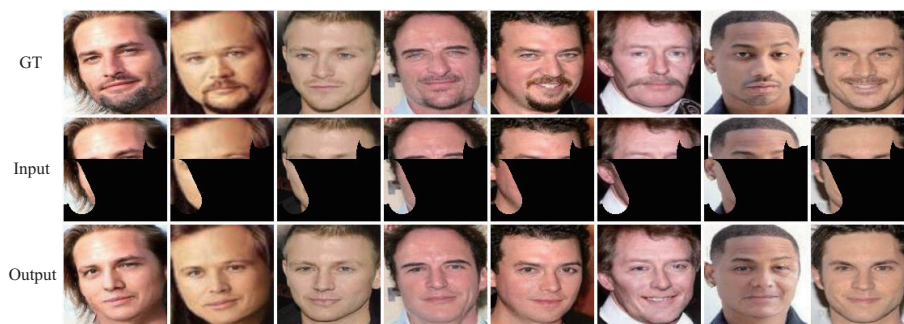

**Fig. 7.** Examples of face image inpainting with 'non-mustache' attribute. Images are sampled from CelebA dataset. From top to bottom: original image, input image, and reconstructed result.

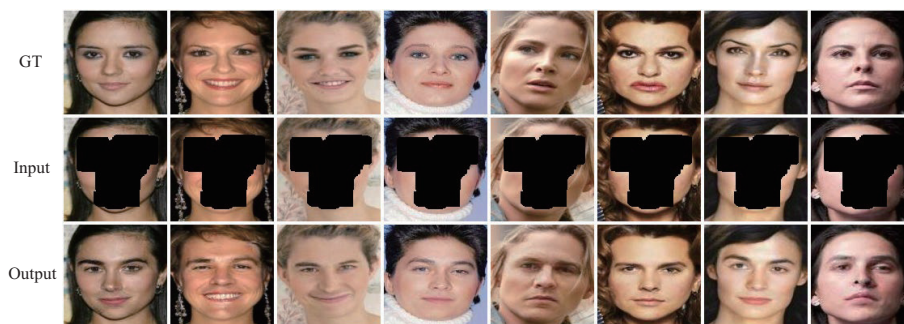

**Fig. 8.** Examples of face image inpainting with 'male' attribute. Images are sampled from CelebA dataset. From top to bottom: original image, input image, and reconstructed result.

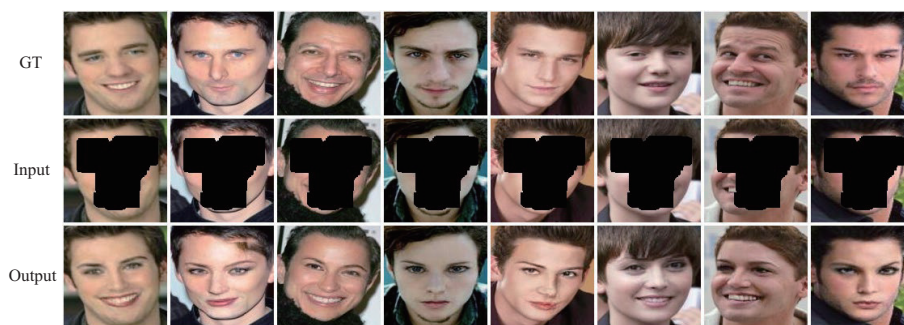

**Fig. 9.** Examples of face image inpainting with 'female' attribute. Images are sampled from CelebA dataset. From top to bottom: original image, input image, and reconstructed result.

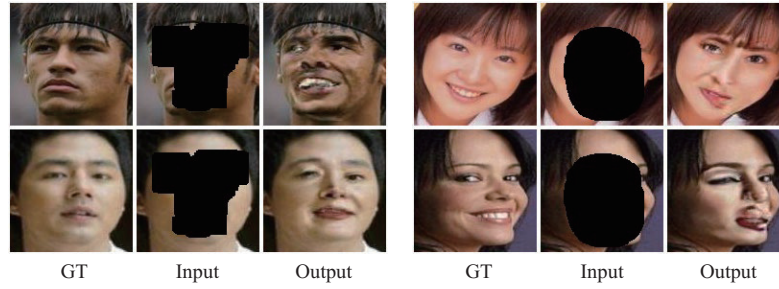

**Fig. 10.** Failed cases of face image inpainting with 'smile' (left) and 'non-smile' (right) attributes.

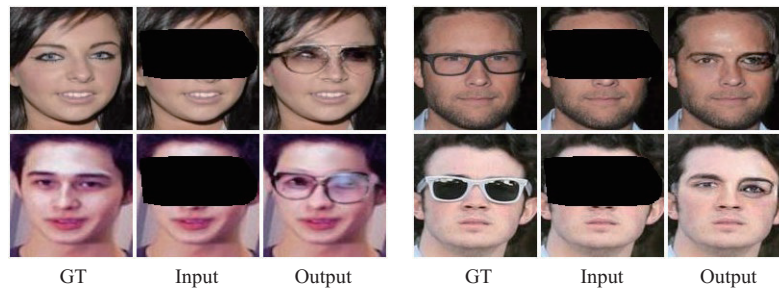

**Fig. 11.** Failed cases of face image inpainting with 'glasses' (left) and 'non-glasses' (right) attributes.

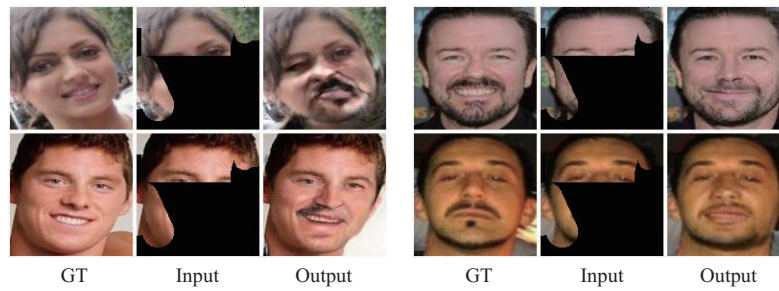

**Fig. 12.** Failed cases of face image inpainting with 'mustache' (left) and 'non-mustache' (right) attributes.

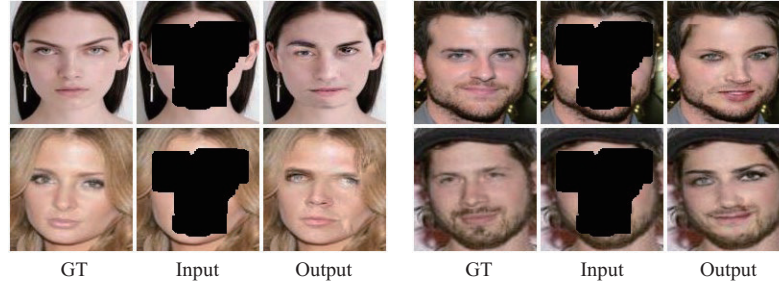

**Fig. 13.** Failed cases of face image inpainting with 'male' (left) and 'female' (right) attributes.

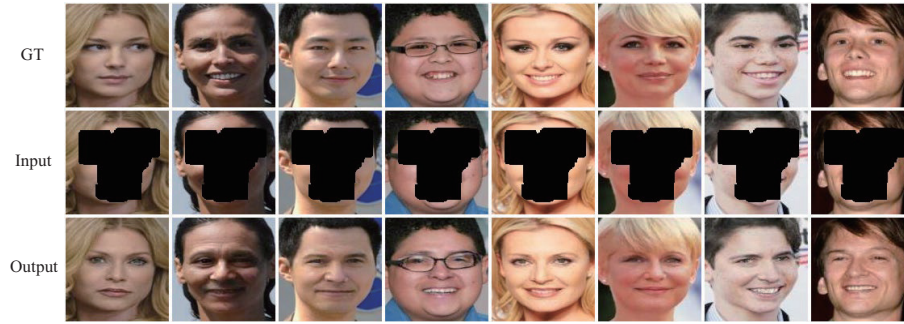

**Fig. 14.** Examples of face image inpainting with 'old' attribute. From top to bottom: original image, input image, and reconstructed result.

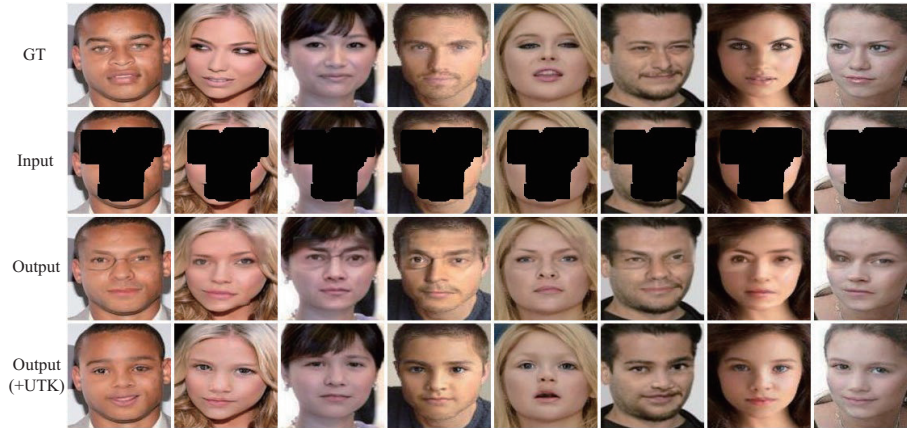

**Fig. 15.** Examples of face image inpainting with 'young' attribute. We employed shuffled dataset from CelebA and UTK. From top to bottom: original image, input image, reconstructed result using only CelebA, reconstructed result using CelebA and young face images from UTK. Due to lack of young images in CelebA dataset, dataset mixing with UTK demonstrated more visually improved results.

## References

1. Yang, G., Fei, N., Ding, M., Liu, G., Lu, Z., Xiang, T.: L2m-gan: Learning to manipulate latent space semantics for facial attribute editing. In: Proceedings of the IEEE/CVF Conference on Computer Vision and Pattern Recognition. (2021) 2951–2960
2. Karras, T., Laine, S., Aittala, M., Hellsten, J., Lehtinen, J., Aila, T.: Analyzing and improving the image quality of stylegan. In: Proceedings of the IEEE/CVF conference on computer vision and pattern recognition. (2020) 8110–8119
3. Zhao, S., Cui, J., Sheng, Y., Dong, Y., Liang, X., Chang, E.I., Xu, Y.: Large scale image completion via co-modulated generative adversarial networks. arXiv preprint arXiv:2103.10428 (2021)
4. Liu, M.Y., Huang, X., Mallya, A., Karras, T., Aila, T., Lehtinen, J., Kautz, J.: Few-shot unsupervised image-to-image translation. In: Proceedings of the IEEE/CVF International Conference on Computer Vision. (2019) 10551–10560
5. Arjovsky, M., Chintala, S., Bottou, L.: Wasserstein generative adversarial networks. In: International conference on machine learning, PMLR (2017) 214–223
6. Liu, Z., Luo, P., Wang, X., Tang, X.: Deep learning face attributes in the wild. In: Proceedings of the IEEE international conference on computer vision. (2015) 3730–3738
7. Zhang, K., Zhang, Z., Li, Z., Qiao, Y.: Joint face detection and alignment using multitask cascaded convolutional networks. IEEE signal processing letters **23** (2016) 1499–1503
8. Yu, J., Lin, Z., Yang, J., Shen, X., Lu, X., Huang, T.S.: Free-form image inpainting with gated convolution. In: Proceedings of the IEEE/CVF International Conference on Computer Vision. (2019) 4471–4480
9. Deng, J., Guo, J., Xue, N., Zafeiriou, S.: Arcface: Additive angular margin loss for deep face recognition. In: Proceedings of the IEEE/CVF conference on computer vision and pattern recognition. (2019) 4690–4699
10. He, K., Zhang, X., Ren, S., Sun, J.: Deep residual learning for image recognition. In: Proceedings of the IEEE conference on computer vision and pattern recognition. (2016) 770–778
11. Yi, D., Lei, Z., Liao, S., Li, S.Z.: Learning face representation from scratch. arXiv preprint arXiv:1411.7923 (2014)
12. Zhang, Z., Song, Y., Qi, H.: Age progression/regression by conditional adversarial autoencoder. In: Proceedings of the IEEE conference on computer vision and pattern recognition. (2017) 5810–5818
