# Supplementary material
Source: ML conference proceedings conference paper supplement (https://openaccess.thecvf.com/content/ACCV2022/html/Cha_SAC-GAN__Face_ACCV_2022_paper.html)
Supplement: Supplementary file 1 [file Cha_SAC-GAN__Face_ACCV_2022_supplemental.pdf › 0895_supp.tex]

% Updated in February 2016 by Hwann-Tzong Chen
% Updated in May 2014 by Hideo Saito
% Updated in March 2012 by Yasuyuki Matsushita
% Updated in April 2002 by Antje Endemann, ...., and in March 2010 by Reinhard Klette
% Based on CVPR 07 and LNCS style, with modifications by DAF, AZ and elle 2008, AA 2010, ACCV 2010

\documentclass[runningheads]{llncs}
%
\usepackage[T1]{fontenc}
% T1 fonts will be used to generate the final print and online PDFs,
% so please use T1 fonts in your manuscript whenever possible.
% Other font encondings may result in incorrect characters.
%

\usepackage{graphicx}
\usepackage{amsmath,amssymb} % define this before the line numbering.
\usepackage{color}
\usepackage{algorithm}
\usepackage{algpseudocode}
\usepackage{multirow}
\usepackage{hyperref}
\usepackage{xcolor,colortbl}
\usepackage{makecell}
\usepackage{placeins}
\usepackage{xcolor}
\hypersetup{
	colorlinks,
	linkcolor={red!50!red},
	citecolor={blue!30!green},
	urlcolor={blue!80!black}
}


\definecolor{Gray}{gray}{0.85}
\definecolor{LightCyan}{rgb}{0.88,1,1}

\newcolumntype{a}{>{\columncolor{Gray}}|c|}
\newcolumntype{b}{>{\columncolor{white}}|c|}
\newcolumntype{P}[1]{>{\centering\arraybackslash}p{#1}}
\newcolumntype{A}[1]{>{\centering\arraybackslash}p{#1}}

\newcommand{\mc}[2]{\multicolumn{#1}{|c|}{#2}}

\usepackage{color}
\renewcommand\UrlFont{\color{blue}\rmfamily}

%===========================================================
\begin{document}
	\pagestyle{headings}
	\mainmatter
	
	\def\ACCV22SubNumber{895}  % Insert your submission number here
	
	%===========================================================
	\title{Supplementary Materials} % Replace with your title
	\titlerunning{ACCV-22 submission ID \ACCV22SubNumber}
	\authorrunning{ACCV-22 submission ID \ACCV22SubNumber}
	
	\author{Anonymous ACCV 2022 submission}
	\institute{Paper ID \ACCV22SubNumber}
	
	\maketitle
	
	%===========================================================
	
	%===========================================================
	\section{Network Architecture}
	
	\subsection{Generator}
	
	Detailed components of the encoder and the decoder in our proposed SAC-GAN are listed in Table \ref{tab:gen}. In our experiments, we set the image size as 128$\times$128 and style maps from 512$\times$16$\times$16 to 512$\times$128$\times$128. Our network code is strongly motivated by implementation of L2M-GAN \cite{yang2021l2m}.
	
	Input image size is set to 3$\times$128$\times$128 and mask has shape of 1$\times$128$\times$128, which are concatenated before being entered to the encoder. The output of the encoder is 512$\times$16$\times$16 feature. During synthesis phase from the decoder, each layer in the decoder has modulation function for applying spatial style maps obtained from the mapper $\mathcal{M}$ and the upsampling network. Each layer of the generator is a convolutional residual block, and the block of the encoder has 2x2 Avg pooling function, while the block of the decoder has the function of upsampling and weight modulation. We adopted weight modulation from the implementation of StyleGAN v2 \cite{karras2020analyzing}.
	
	The architecture of mapper network and upsampling network are provided in Table \ref{tab:map}. Concatenation of feature and style code is originally used in COMOD-GAN \cite{zhao2021large} and we modified it to handle spatial tensors. 
	
	\subsection{Discriminator}
	
	We adopted multi-task discriminator from \cite{liu2019few} without special modification but we added gradient penalty from WGAN \cite{arjovsky2017wasserstein} for stable convergence of training. The number of branches in the discriminator is the same as the number of attribute domains to be utilized.
	
	\section{Dataset Preparation}
	
	\subsection{Images}
	As we mentioned in the paper text, we used wild data without alignment because there is a possibility that the spatial information will be fixed if we use aligned face images. So we cropped 202,599 images from CelebA \cite{liu2015deep} dataset using only face detector from MTCNN \cite{zhang2016joint} without any alignment based on landmarks. The pixel margin value is set to 24 and if detector failed to face, we just manually cropped it from center. All images are resized to 128$\times$128 in dataset loader for training.
	
	%Do not use any additional Latex macros.

	\begin{table}
		\centering
		%\begin{tabular}{l|P{1.5cm}P{1.5cm}P{1.5cm}P{1.5cm}P{1.5cm}P{1.5cm}}
		\begin{tabular}{|A{2.5cm}|P{0.8cm}|P{1.8cm}P{1.5cm}P{2.2cm}|}
			\hline
			\rowcolor{LightCyan}
			\multicolumn{5}{|c|}{Encoder}         \\ \hline
			\multicolumn{1}{|c|}{\cellcolor{gray!50}Block Name}  & \multicolumn{1}{c}{\cellcolor{gray!50}No.} & \multicolumn{1}{|c}{\cellcolor{gray!50}Layer} & \multicolumn{1}{c}{\cellcolor{gray!50}Act} & \multicolumn{1}{c|}{\cellcolor{gray!50}Output Size} \\
			\hline
			Mask Concat & 1. & Concat & - & 4$\times$128$\times$128 \\ \hline
			From RGB & 1. & Conv3$\times$3 & - & 128$\times$128$\times$128 \\ \hline
			\multirow{3}{*}{Resblock 1} & 1. & Conv3$\times$3 & LReLU & 128$\times$128$\times$128 \\
			& 2. & Avg Pool & - & 128$\times$64$\times$64 \\ 
			& 3. & Conv3$\times$3 & LReLU & 128$\times$64$\times$64 \\  \hline
			\multirow{3}{*}{Resblock 2} & 1. & Conv3$\times$3 & LReLU & 256$\times$64$\times$64 \\ 
			& 2. & Avg Pool & - & 256$\times$32$\times$32 \\ 
			& 3. & Conv3$\times$3 & LReLU & 256$\times$32$\times$32 \\ \hline
			\multirow{3}{*}{Resblock 3} & 1. & Conv3$\times$3 & LReLU & 512$\times$32$\times$32 \\ 
			& 2. & Avg Pool & - & 512$\times$16$\times$16 \\ 
			& 3. & Conv3$\times$3 & LReLU & 512$\times$16$\times$16 \\ \hline
			\multirow{2}{*}{Resblock 4} & 1. & Conv3$\times$3 & LReLU & 512$\times$16$\times$16 \\ 
			& 2. & Conv3$\times$3 & LReLU & 512$\times$16$\times$16 \\ \hline
			\multirow{2}{*}{Resblock 5} & 1. & Conv3$\times$3 & LReLU & 512$\times$16$\times$16 \\ 
			& 2. & Conv3$\times$3 & LReLU & 512$\times$16$\times$16 \\ 
			\hline \hline
			
			\rowcolor{LightCyan}
			\multicolumn{5}{|c|}{Decoder}         \\ \hline
			\multicolumn{1}{|c|}{\cellcolor{gray!50}Block Name}  & \multicolumn{1}{c}{\cellcolor{gray!50}No.} & \multicolumn{1}{|c}{\cellcolor{gray!50}Layer} & \multicolumn{1}{c}{\cellcolor{gray!50}Act} & \multicolumn{1}{c|}{\cellcolor{gray!50}Output Size} \\
			\hline
			\multirow{3}{*}{Resblock 1} & 1. & Conv3$\times$3 & LReLU & 512$\times$16$\times$16 \\ 
			& 2. & Conv3$\times$3 & LReLU & 512$\times$16$\times$16 \\ 
			& 3. & Modulation & - & 512$\times$16$\times$16 \\ \hline
			\multirow{3}{*}{Resblock 2} & 1. & Conv3$\times$3 & LReLU & 512$\times$16$\times$16 \\ 
			& 2. & Conv3$\times$3 & LReLU & 512$\times$16$\times$16 \\ 
			& 3. & Modulation & - & 512$\times$16$\times$16 \\ \hline
			\multirow{4}{*}{Resblock 3} & 1. & Conv3$\times$3 & LReLU & 512$\times$16$\times$16 \\ 
			& 2. & Upsample & - & 512$\times$32$\times$32 \\ 
			& 3. & Conv3$\times$3 & LReLU & 512$\times$32$\times$32 \\ 
			& 4. & Modulation & - & 512$\times$32$\times$32 \\ \hline
			\multirow{4}{*}{Resblock 4} & 1. & Conv3$\times$3 & LReLU & 512$\times$32$\times$32 \\ 
			& 2. & Upsample & - & 512$\times$64$\times$64 \\ 
			& 3. & Conv3$\times$3 & LReLU & 256$\times$64$\times$64 \\ 
			& 4. & Modulation & - & 256$\times$64$\times$64 \\ \hline
			\multirow{4}{*}{Resblock 5} & 1. & Conv3$\times$3 & LReLU & 256$\times$64$\times$64 \\ 
			& 2. & Upsample & - & 256$\times$128$\times$128 \\ 
			& 3. & Conv3$\times$3 & LReLU & 128$\times$128$\times$128 \\ 
			& 4. & Modulation & - & 128$\times$128$\times$128 \\ \hline
			To RGB & 1. & Conv3$\times$3 & - & 3$\times$128$\times$128 \\
			\hline
		\end{tabular}
		\vspace{0.4cm}
		\caption{The configurations of the encoder and the decoder from SAC-GAN.}
		\label{tab:gen}
	\end{table}
	
	
	\subsection{Masks}
	We prepared custom binary masks to cover face images and utilized them as fixed masks for experiments. According to target attributes, we used several fixed masks to make occlusion on some regions. For example, for the manipulation inpainting of 'mustache', we deployed a fixed mask covers nearby areas around the nose. We conducted quantitative comparisons for 'smile' attribute with mask that occludes most pixels of the face. Because our CelebA images are not aligned, there were some images that our fixed mask cannot cover all of the facial components.
	
	For irregular masks, we adopted mask generator code from gated convolution \cite{yu2019free}. Fig. \ref{fig:result_ns_s_rand} presents reconstruction outputs of image inpainting using irregular random masks for 'smile' attribute. Like fixed masks, those randomly generated irregular masks sometimes do not cover pixels related to target attributes. For example, column 7-8 images in Fig. \ref{fig:result_ns_s_rand} demonstrate the reconstructed output that the smiling attribute is not applied because their masks didn't cover mouth area, which is an important component for 'smile' attribute.
	
	
	\subsection{Face Recognizer}
	
	Face recognizer is employed for computation of identity preserving loss (denoted as $\mathcal{L}_{id}$) between reconstructed images according to the source domain and other target domains. It extracts face feature embeddings from subject images and our inpainting network is trained by reducing the feature-space distance between embeddings generated from the same subjects. Identity preserving loss consequently guarantee images restored from any target domain maintain a same identity. We employed ArcFace \cite{deng2019arcface} for training face recognizer with ResNet-50 \cite{he2016deep} backbone network and they are trained on CASIA-WebFace dataset \cite{yi2014learning}. During the training process of our inpainting model, recognizer network is fixed (set to evaluation mode). Unlike other ArcFace open source codes using 112$\times$112 size of images, we modified some layers in backbone ResNet to handle 128$\times$128 size of images to match the size for CelebA images for the generator and the discriminator.
	
	
	
	% -----------------------------------------------------------------
	\begin{table}[t]
		\centering
		%\begin{tabular}{l|P{1.5cm}P{1.5cm}P{1.5cm}P{1.5cm}P{1.5cm}P{1.5cm}}
		\begin{tabular}{|A{2.5cm}|P{0.8cm}|P{1.8cm}P{1.5cm}P{2.2cm}|}
			\hline
			\rowcolor{LightCyan}
			\multicolumn{5}{|c|}{Mapper \& Upsampling Network}         \\ \hline
			\multicolumn{1}{|c|}{\cellcolor{gray!50}Block Name}  & \multicolumn{1}{c}{\cellcolor{gray!50}No.} & \multicolumn{1}{|c}{\cellcolor{gray!50}Layer} & \multicolumn{1}{c}{\cellcolor{gray!50}Act} & \multicolumn{1}{c|}{\cellcolor{gray!50}Output Size} \\
			\hline
			\multirow{3}{*}{Linear} & 1. & Linear & - & 128 \\ 
			& 2. & Linear & - & 128$\cdot$16$\cdot$16 \\
			& 3. & Reshape & - & 128$\times$16$\times$16 \\ \hline
			\makecell{Feature\\ +Style Concat} & 1. & Concat & - &  \makecell{(128+512) \\ $\times$16$\times$16} \\ \hline
			Conv & 1. & Conv1$\times$1 & - & 512$\times$16$\times$16 \\ \hline
			\multirow{4}{*}{Mapper} & 1. & Conv3$\times$3 & ReLU & 512$\times$16$\times$16 \\ 
			& 2. & Conv3$\times$3 & ReLU & 512$\times$16$\times$16 \\ 
			& 3. & Conv3$\times$3 & ReLU & 512$\times$16$\times$16 \\ 
			& 4. & Conv3$\times$3 & ReLU & 512$\times$16$\times$16 \\ \hline
			Conv & 1. & Conv3$\times$3 & ReLU & 512$\times$16$\times$16 \\ \hline
			\multirow{2}{*}{Upsampling 1} & 1. & Upsample & - & 512$\times$32$\times$32 \\
			& 2. & Conv3$\times$3 & ReLU & 512$\times$32$\times$32 \\ \hline
			\multirow{2}{*}{Upsampling 2} & 1. & Upsample & - & 512$\times$64$\times$64 \\
			& 2. & Conv3$\times$3 & ReLU & 512$\times$64$\times$64 \\ \hline
			\multirow{2}{*}{Upsampling 3} & 1. & Upsample & - & 512$\times$128$\times$128 \\
			& 2. & Conv3$\times$3 & ReLU & 512$\times$128$\times$128 \\
			
			\hline
		\end{tabular}
		\vspace{0.4cm}
		\caption{The configurations of the encoder and the mapping network $\mathcal{M}$.}
		\label{tab:map}
	\end{table}
	
	\section{Succeeded Cases}
	
	In this section, we presents other successful cases using four attributes ('smile', 'glasses', 'mustache', and 'gender') in Fig. \ref{fig:result_ns_s}-\ref{fig:result_s_ns} ('smile'), Fig. \ref{fig:result_ng_g}-\ref{fig:result_g_ng} ('glasses'), Fig. \ref{fig:result_nm_m}-\ref{fig:result_m_nm} ('mustache'), and Fig. \ref{fig:result_fm}-\ref{fig:result_mf} ('gender').
	
	%------------------------ [SMILE] -----------------
	
	\begin{figure}[h]
		\centering
		\includegraphics[width=0.99\textwidth]{supple_figs/ns_s.eps} 
		\caption{
			Examples of face image inpainting with 'smile' attribute. Images are sampled from CelebA dataset. From top to bottom: original image, input image, and reconstructed result.}
		\label{fig:result_ns_s}
	\end{figure}
	
	\begin{figure}[h]
		\centering
		\includegraphics[width=0.99\textwidth]{supple_figs/s_ns.eps} 
		\caption{
			Examples of face image inpainting with 'non-smile' attribute. Images are sampled from CelebA dataset. From top to bottom: original image, input image, and reconstructed result.}
		\label{fig:result_s_ns}
	\end{figure}
	
		\begin{figure}[h]
		\centering
		\includegraphics[width=0.99\textwidth]{supple_figs/ns_s_rand.eps} 
		\caption{
			Examples of face image inpainting with 'smile' attribute and irregular masks. Images are sampled from CelebA dataset. From top to bottom: original image, input image, and reconstructed result. column 1-6 show successfully reconstructed output with 'smile' attribute but in cases of column 7-8, the target 'smile' attribute was not applied because the mask did not cover important part for the expected attribute.}
		\label{fig:result_ns_s_rand}
	\end{figure}
	
	
	
	%------------------------ [GLASSES] -----------------
	
	\begin{figure}[h]
		\centering
		\includegraphics[width=0.99\textwidth]{supple_figs/ng_g.eps} 
		\caption{
			Examples of face image inpainting with 'glasses' attribute. Images are sampled from CelebA dataset. From top to bottom: original image, input image, and reconstructed result.}
		\label{fig:result_ng_g}
	\end{figure}
	
	\begin{figure}[h]
		\centering
		\includegraphics[width=0.99\textwidth]{supple_figs/g_ng.eps} 
		\caption{
			Examples of face image inpainting with 'non-glasses' attribute. Images are sampled from CelebA dataset. From top to bottom: original image, input image, and reconstructed result.}
		\label{fig:result_g_ng}
	\end{figure}
	
	
	%------------------------ [MUSTACHE] -----------------
	
	\begin{figure}[h]
		\centering
		\includegraphics[width=0.99\textwidth]{supple_figs/nm_m.eps} 
		\caption{
			Examples of face image inpainting with 'mustache' attribute. Images are sampled from CelebA dataset. From top to bottom: original image, input image, and reconstructed result.}
		\label{fig:result_nm_m}
	\end{figure}
	
	\begin{figure}[h]
		\centering
		\includegraphics[width=0.99\textwidth]{supple_figs/m_nm.eps} 
		\caption{
			Examples of face image inpainting with 'non-mustache' attribute. Images are sampled from CelebA dataset. From top to bottom: original image, input image, and reconstructed result.}
		\label{fig:result_m_nm}
	\end{figure}
	
	
	%------------------------ [GENDER] -----------------
	
	\begin{figure}[h]
		\centering
		\includegraphics[width=0.99\textwidth]{supple_figs/f_m.eps} 
		\caption{
			Examples of face image inpainting with 'male' attribute. Images are sampled from CelebA dataset. From top to bottom: original image, input image, and reconstructed result.}
		\label{fig:result_fm}
	\end{figure}
	
	\begin{figure}[h]
		\centering
		\includegraphics[width=0.99\textwidth]{supple_figs/m_f.eps} 
		\caption{
			Examples of face image inpainting with 'female' attribute. Images are sampled from CelebA dataset. From top to bottom: original image, input image, and reconstructed result.}
		\label{fig:result_mf}
	\end{figure}
	
	
	\section{Failure Cases}
	
	During experiments for various facial attributes we found some failed cases from reconstructed outputs. We presented several failed cases for four attributes in Fig. \ref{fig:result_fail_smile}-\ref{fig:result_fail_gender}. In Fig. \ref{fig:result_fail_smile}, the reconstructed mouth shape is very unnatural in both case 'smile $\rightarrow$ non-smile' and 'non-smile $\rightarrow$ smile'. In Fig. \ref{fig:result_fail_glasses}, each glass lens in synthesized images is showing different figure with each other for 'non-glasses $\rightarrow$ glasses' and glasses are not removed completely for 'glasses $\rightarrow$ non-glasses'. In Fig. \ref{fig:result_fail_mustache}, mustache still exists in the case of 'mustache $\rightarrow$ non-mustache' and synthesized mustache is not natural or complete in the case of 'non-mustache $\rightarrow$ mustache'. In Fig. \ref{fig:result_fail_gender}, the network failed to exclude masculine attributes like mustache in the case of 'male $\rightarrow$ female'.
	
	%------------------------ [SMILE FAIL] -----------------
	\begin{figure}[h]
		\centering
		\includegraphics[width=0.85\textwidth]{supple_figs/smile_fail.eps} 
		\caption{
			Failed cases of face image inpainting with 'smile' (left) and 'non-smile' (right) attributes.}
		\label{fig:result_fail_smile}
	\end{figure}
	%------------------------ [GLASSES FAIL] -----------------
	\begin{figure}[h]
		\centering
		\includegraphics[width=0.85\textwidth]{supple_figs/glasses_fail.eps} 
		\caption{Failed cases of face image inpainting with 'glasses' (left) and 'non-glasses' (right) attributes.}
		\label{fig:result_fail_glasses}
	\end{figure}
	%------------------------ [MUSTACHE FAIL] -----------------
	\begin{figure}[h]
		\centering
		\includegraphics[width=0.85\textwidth]{supple_figs/mustache_fail.eps} 
		\caption{
			Failed cases of face image inpainting with 'mustache' (left) and 'non-mustache' (right) attributes.}
		\label{fig:result_fail_mustache}
	\end{figure}
	%------------------------ [GENDER FAIL] -----------------
	\begin{figure}[h]
		\centering
		\includegraphics[width=0.85\textwidth]{supple_figs/gender_fail.eps} 
		\caption{
			Failed cases of face image inpainting with 'male' (left) and 'female' (right) attributes.}
		\label{fig:result_fail_gender}
	\end{figure}
	
	\subsection{Application to Different Dataset}
	
	On the other hand, in some attributes, expected results didn't come out due to the problem of attributes from CelebA dataset. For example, while test for 'young $\rightarrow$ old' shows considerably plausible outputs as shown in Fig. \ref{fig:result_oy}, results for 'old $\rightarrow$ young' synthesized bad outputs as described in Fig. \ref{fig:result_yo} (row 3). Since most of the faces in CelebA dataset consist of adults, the visual difference between 'young' and 'old' domains is not evident. 
	
	We employed UTK dataset \cite{zhang2017age} containing face images with various age and replaced the 'young' domain dataset with them. We collected 3,538 young face images under 14 years old and replaced previous 'young' images from CelebA with 'young' images from UTK. We provided the results in Fig. \ref{fig:result_yo} (row 4) and outputs are showing considerably successful results compared with using only CelebA dataset (row 3). 
	
	
	
	%------------------------ [AGE] -----------------
	
	\begin{figure}[h]
		\centering
		\includegraphics[width=0.99\textwidth]{supple_figs/y_o.eps} 
		\caption{
			Examples of face image inpainting with 'old' attribute. From top to bottom: original image, input image, and reconstructed result.}
		\label{fig:result_yo}
	\end{figure}
	
	\begin{figure}[h]
		\centering
		\includegraphics[width=0.99\textwidth]{supple_figs/o_y.eps} 
		\caption{
			Examples of face image inpainting with 'young' attribute. We employed shuffled dataset from CelebA and UTK. From top to bottom: original image, input image, reconstructed result using only CelebA, recontructed result using CelebA and young face images from UTK. Due to lack of young images in CelebA dataset, dataset mixing with UTK demonstrated more visually improved results.}
		\label{fig:result_oy}
	\end{figure}
	
	%------------------------------------------------------------------------- 
	\FloatBarrier
	
	%===========================================================
	\bibliographystyle{splncs}
	\bibliography{egbib}
	
	%this would normally be the end of your paper, but you may also have an appendix
	%within the given limit of number of pages
\end{document}
