# Supplementary material
Source: ML conference proceedings conference paper supplement (https://openaccess.thecvf.com/content/ACCV2022/html/Cha_SAC-GAN__Face_ACCV_2022_paper.html)
Supplement: Supplementary file 1 [file Cha_SAC-GAN__Face_ACCV_2022_supplemental.pdf › egbib.bib]

@misc{Authors22,
 author = {Authors},
 title = {The frobnicatable foo filter},
 note = {ACCV22 submission ID 512. Supplied as additional material {\tt accv22-512-frfofi.pdf}},
 year = 2022
}

@misc{Authors22b,
 author = {Authors},
 title = {Frobnication tutorial},
 note = {Supplied as additional material {\tt accv22-512-frtut.pdf}},
 year = 2022
}

@inproceedings{arjovsky2017wasserstein,
  title={Wasserstein generative adversarial networks},
  author={Arjovsky, Martin and Chintala, Soumith and Bottou, L{\'e}on},
  booktitle={International conference on machine learning},
  pages={214--223},
  year={2017},
  organization={PMLR}
}

@article{gulrajani2017improved,
  title={Improved training of wasserstein gans},
  author={Gulrajani, Ishaan and Ahmed, Faruk and Arjovsky, Martin and Dumoulin, Vincent and Courville, Aaron C},
  journal={Advances in neural information processing systems},
  volume={30},
  year={2017}
}

@article{zhao2021large,
  title={Large scale image completion via co-modulated generative adversarial networks},
  author={Zhao, Shengyu and Cui, Jonathan and Sheng, Yilun and Dong, Yue and Liang, Xiao and Chang, Eric I and Xu, Yan},
  journal={arXiv preprint arXiv:2103.10428},
  year={2021}
}

@inproceedings{zhou2016learning,
  title={Learning dense correspondence via 3d-guided cycle consistency},
  author={Zhou, Tinghui and Krahenbuhl, Philipp and Aubry, Mathieu and Huang, Qixing and Efros, Alexei A},
  booktitle={Proceedings of the IEEE Conference on Computer Vision and Pattern Recognition},
  pages={117--126},
  year={2016}
}

@inproceedings{zhu2017unpaired,
  title={Unpaired image-to-image translation using cycle-consistent adversarial networks},
  author={Zhu, Jun-Yan and Park, Taesung and Isola, Phillip and Efros, Alexei A},
  booktitle={Proceedings of the IEEE international conference on computer vision},
  pages={2223--2232},
  year={2017}
}

@inproceedings{ronneberger2015u,
  title={U-net: Convolutional networks for biomedical image segmentation},
  author={Ronneberger, Olaf and Fischer, Philipp and Brox, Thomas},
  booktitle={International Conference on Medical image computing and computer-assisted intervention},
  pages={234--241},
  year={2015},
  organization={Springer}
}

@inproceedings{karras2020analyzing,
  title={Analyzing and improving the image quality of stylegan},
  author={Karras, Tero and Laine, Samuli and Aittala, Miika and Hellsten, Janne and Lehtinen, Jaakko and Aila, Timo},
  booktitle={Proceedings of the IEEE/CVF conference on computer vision and pattern recognition},
  pages={8110--8119},
  year={2020}
}

@inproceedings{liu2019few,
  title={Few-shot unsupervised image-to-image translation},
  author={Liu, Ming-Yu and Huang, Xun and Mallya, Arun and Karras, Tero and Aila, Timo and Lehtinen, Jaakko and Kautz, Jan},
  booktitle={Proceedings of the IEEE/CVF International Conference on Computer Vision},
  pages={10551--10560},
  year={2019}
}

@inproceedings{yang2021l2m,
  title={L2M-GAN: Learning to Manipulate Latent Space Semantics for Facial Attribute Editing},
  author={Yang, Guoxing and Fei, Nanyi and Ding, Mingyu and Liu, Guangzhen and Lu, Zhiwu and Xiang, Tao},
  booktitle={Proceedings of the IEEE/CVF Conference on Computer Vision and Pattern Recognition},
  pages={2951--2960},
  year={2021}
}


@inproceedings{mescheder2018training,
  title={Which training methods for GANs do actually converge?},
  author={Mescheder, Lars and Geiger, Andreas and Nowozin, Sebastian},
  booktitle={International conference on machine learning},
  pages={3481--3490},
  year={2018},
  organization={PMLR}
}

@inproceedings{deng2019arcface,
  title={Arcface: Additive angular margin loss for deep face recognition},
  author={Deng, Jiankang and Guo, Jia and Xue, Niannan and Zafeiriou, Stefanos},
  booktitle={Proceedings of the IEEE/CVF conference on computer vision and pattern recognition},
  pages={4690--4699},
  year={2019}
}

@article{yi2014learning,
  title={Learning face representation from scratch},
  author={Yi, Dong and Lei, Zhen and Liao, Shengcai and Li, Stan Z},
  journal={arXiv preprint arXiv:1411.7923},
  year={2014}
}

@article{barnes2009patchmatch,
  title={PatchMatch: A randomized correspondence algorithm for structural image editing},
  author={Barnes, Connelly and Shechtman, Eli and Finkelstein, Adam and Goldman, Dan B},
  journal={ACM Trans. Graph.},
  volume={28},
  number={3},
  pages={24},
  year={2009}
}

@article{iizuka2017globally,
  title={Globally and locally consistent image completion},
  author={Iizuka, Satoshi and Simo-Serra, Edgar and Ishikawa, Hiroshi},
  journal={ACM Transactions on Graphics (ToG)},
  volume={36},
  number={4},
  pages={1--14},
  year={2017},
  publisher={ACM New York, NY, USA}
}

@inproceedings{pathak2016context,
  title={Context encoders: Feature learning by inpainting},
  author={Pathak, Deepak and Krahenbuhl, Philipp and Donahue, Jeff and Darrell, Trevor and Efros, Alexei A},
  booktitle={Proceedings of the IEEE conference on computer vision and pattern recognition},
  pages={2536--2544},
  year={2016}
}

@article{wang2019laplacian,
  title={Laplacian pyramid adversarial network for face completion},
  author={Wang, Qiang and Fan, Huijie and Sun, Gan and Cong, Yang and Tang, Yandong},
  journal={Pattern Recognition},
  volume={88},
  pages={493--505},
  year={2019},
  publisher={Elsevier}
}

@inproceedings{li2017generative,
  title={Generative face completion},
  author={Li, Yijun and Liu, Sifei and Yang, Jimei and Yang, Ming-Hsuan},
  booktitle={Proceedings of the IEEE conference on computer vision and pattern recognition},
  pages={3911--3919},
  year={2017}
}

@inproceedings{yu2018generative,
  title={Generative image inpainting with contextual attention},
  author={Yu, Jiahui and Lin, Zhe and Yang, Jimei and Shen, Xiaohui and Lu, Xin and Huang, Thomas S},
  booktitle={Proceedings of the IEEE conference on computer vision and pattern recognition},
  pages={5505--5514},
  year={2018}
}

@inproceedings{zeng2019learning,
  title={Learning pyramid-context encoder network for high-quality image inpainting},
  author={Zeng, Yanhong and Fu, Jianlong and Chao, Hongyang and Guo, Baining},
  booktitle={Proceedings of the IEEE/CVF Conference on Computer Vision and Pattern Recognition},
  pages={1486--1494},
  year={2019}
}

@inproceedings{liu2018image,
  title={Image inpainting for irregular holes using partial convolutions},
  author={Liu, Guilin and Reda, Fitsum A and Shih, Kevin J and Wang, Ting-Chun and Tao, Andrew and Catanzaro, Bryan},
  booktitle={Proceedings of the European conference on computer vision (ECCV)},
  pages={85--100},
  year={2018}
}

@inproceedings{yu2019free,
  title={Free-form image inpainting with gated convolution},
  author={Yu, Jiahui and Lin, Zhe and Yang, Jimei and Shen, Xiaohui and Lu, Xin and Huang, Thomas S},
  booktitle={Proceedings of the IEEE/CVF International Conference on Computer Vision},
  pages={4471--4480},
  year={2019}
}

@article{goodfellow2014generative,
  title={Generative adversarial nets},
  author={Goodfellow, Ian and Pouget-Abadie, Jean and Mirza, Mehdi and Xu, Bing and Warde-Farley, David and Ozair, Sherjil and Courville, Aaron and Bengio, Yoshua},
  journal={Advances in neural information processing systems},
  volume={27},
  year={2014}
}

@inproceedings{isola2017image,
  title={Image-to-image translation with conditional adversarial networks},
  author={Isola, Phillip and Zhu, Jun-Yan and Zhou, Tinghui and Efros, Alexei A},
  booktitle={Proceedings of the IEEE conference on computer vision and pattern recognition},
  pages={1125--1134},
  year={2017}
}

@inproceedings{huang2017arbitrary,
  title={Arbitrary style transfer in real-time with adaptive instance normalization},
  author={Huang, Xun and Belongie, Serge},
  booktitle={Proceedings of the IEEE international conference on computer vision},
  pages={1501--1510},
  year={2017}
}

@article{he2020pa,
  title={PA-GAN: Progressive attention generative adversarial network for facial attribute editing},
  author={He, Zhenliang and Kan, Meina and Zhang, Jichao and Shan, Shiguang},
  journal={arXiv preprint arXiv:2007.05892},
  year={2020}
}

@inproceedings{karras2019style,
  title={A style-based generator architecture for generative adversarial networks},
  author={Karras, Tero and Laine, Samuli and Aila, Timo},
  booktitle={Proceedings of the IEEE/CVF conference on computer vision and pattern recognition},
  pages={4401--4410},
  year={2019}
}

@article{mirza2014conditional,
  title={Conditional generative adversarial nets},
  author={Mirza, Mehdi and Osindero, Simon},
  journal={arXiv preprint arXiv:1411.1784},
  year={2014}
}

@article{yang2019lafin,
  title={Lafin: Generative landmark guided face inpainting},
  author={Yang, Yang and Guo, Xiaojie and Ma, Jiayi and Ma, Lin and Ling, Haibin},
  journal={arXiv preprint arXiv:1911.11394},
  year={2019}
}

@inproceedings{nazeri2019edgeconnect,
  title={Edgeconnect: Structure guided image inpainting using edge prediction},
  author={Nazeri, Kamyar and Ng, Eric and Joseph, Tony and Qureshi, Faisal and Ebrahimi, Mehran},
  booktitle={Proceedings of the IEEE/CVF International Conference on Computer Vision Workshops},
  pages={0--0},
  year={2019}
}

@inproceedings{zhao2020uctgan,
  title={Uctgan: Diverse image inpainting based on unsupervised cross-space translation},
  author={Zhao, Lei and Mo, Qihang and Lin, Sihuan and Wang, Zhizhong and Zuo, Zhiwen and Chen, Haibo and Xing, Wei and Lu, Dongming},
  booktitle={Proceedings of the IEEE/CVF conference on computer vision and pattern recognition},
  pages={5741--5750},
  year={2020}
}

@inproceedings{jo2019sc,
  title={Sc-fegan: Face editing generative adversarial network with user's sketch and color},
  author={Jo, Youngjoo and Park, Jongyoul},
  booktitle={Proceedings of the IEEE/CVF international conference on computer vision},
  pages={1745--1753},
  year={2019}
}

@article{lu2022diverse,
  title={Diverse facial inpainting guided by exemplars},
  author={Lu, Wanglong and Zhao, Hanli and Jiang, Xianta and Jin, Xiaogang and Wang, Min and Lyu, Jiankai and Shi, Kaijie},
  journal={arXiv preprint arXiv:2202.06358},
  year={2022}
}

@inproceedings{kim2021exploiting,
  title={Exploiting spatial dimensions of latent in gan for real-time image editing},
  author={Kim, Hyunsu and Choi, Yunjey and Kim, Junho and Yoo, Sungjoo and Uh, Youngjung},
  booktitle={Proceedings of the IEEE/CVF Conference on Computer Vision and Pattern Recognition},
  pages={852--861},
  year={2021}
}

@inproceedings{zhang2018generative,
  title={Generative adversarial network with spatial attention for face attribute editing},
  author={Zhang, Gang and Kan, Meina and Shan, Shiguang and Chen, Xilin},
  booktitle={Proceedings of the European conference on computer vision (ECCV)},
  pages={417--432},
  year={2018}
}

@inproceedings{wilczkowiak2005hole,
  title={Hole filling through photomontage},
  author={Wilczkowiak, Marta and Brostow, Gabriel J and Tordoff, Ben and Cipolla, Roberto},
  booktitle={BMVC 2005-Proceedings of the British Machine Vision Conference 2005},
  year={2005}
}

@inproceedings{choi2018stargan,
  title={Stargan: Unified generative adversarial networks for multi-domain image-to-image translation},
  author={Choi, Yunjey and Choi, Minje and Kim, Munyoung and Ha, Jung-Woo and Kim, Sunghun and Choo, Jaegul},
  booktitle={Proceedings of the IEEE conference on computer vision and pattern recognition},
  pages={8789--8797},
  year={2018}
}

@inproceedings{choi2020stargan,
  title={Stargan v2: Diverse image synthesis for multiple domains},
  author={Choi, Yunjey and Uh, Youngjung and Yoo, Jaejun and Ha, Jung-Woo},
  booktitle={Proceedings of the IEEE/CVF conference on computer vision and pattern recognition},
  pages={8188--8197},
  year={2020}
}

@inproceedings{liu2021pd,
  title={Pd-gan: Probabilistic diverse gan for image inpainting},
  author={Liu, Hongyu and Wan, Ziyu and Huang, Wei and Song, Yibing and Han, Xintong and Liao, Jing},
  booktitle={Proceedings of the IEEE/CVF Conference on Computer Vision and Pattern Recognition},
  pages={9371--9381},
  year={2021}
}

@inproceedings{zheng2019pluralistic,
  title={Pluralistic image completion},
  author={Zheng, Chuanxia and Cham, Tat-Jen and Cai, Jianfei},
  booktitle={Proceedings of the IEEE/CVF Conference on Computer Vision and Pattern Recognition},
  pages={1438--1447},
  year={2019}
}

@inproceedings{yu2021diverse,
  title={Diverse image inpainting with bidirectional and autoregressive transformers},
  author={Yu, Yingchen and Zhan, Fangneng and Wu, Rongliang and Pan, Jianxiong and Cui, Kaiwen and Lu, Shijian and Ma, Feiying and Xie, Xuansong and Miao, Chunyan},
  booktitle={Proceedings of the 29th ACM International Conference on Multimedia},
  pages={69--78},
  year={2021}
}

@inproceedings{richardson2021encoding,
  title={Encoding in style: a stylegan encoder for image-to-image translation},
  author={Richardson, Elad and Alaluf, Yuval and Patashnik, Or and Nitzan, Yotam and Azar, Yaniv and Shapiro, Stav and Cohen-Or, Daniel},
  booktitle={Proceedings of the IEEE/CVF Conference on Computer Vision and Pattern Recognition},
  pages={2287--2296},
  year={2021}
}

@article{karras2017progressive,
  title={Progressive growing of gans for improved quality, stability, and variation},
  author={Karras, Tero and Aila, Timo and Laine, Samuli and Lehtinen, Jaakko},
  journal={arXiv preprint arXiv:1710.10196},
  year={2017}
}

@article{heusel2017gans,
  title={Gans trained by a two time-scale update rule converge to a local nash equilibrium},
  author={Heusel, Martin and Ramsauer, Hubert and Unterthiner, Thomas and Nessler, Bernhard and Hochreiter, Sepp},
  journal={Advances in neural information processing systems},
  volume={30},
  year={2017}
}

@inproceedings{zhang2019self,
  title={Self-attention generative adversarial networks},
  author={Zhang, Han and Goodfellow, Ian and Metaxas, Dimitris and Odena, Augustus},
  booktitle={International conference on machine learning},
  pages={7354--7363},
  year={2019},
  organization={PMLR}
}

@inproceedings{liu2015deep,
  title={Deep learning face attributes in the wild},
  author={Liu, Ziwei and Luo, Ping and Wang, Xiaogang and Tang, Xiaoou},
  booktitle={Proceedings of the IEEE international conference on computer vision},
  pages={3730--3738},
  year={2015}
}

@article{zhang2016joint,
  title={Joint face detection and alignment using multitask cascaded convolutional networks},
  author={Zhang, Kaipeng and Zhang, Zhanpeng and Li, Zhifeng and Qiao, Yu},
  journal={IEEE signal processing letters},
  volume={23},
  number={10},
  pages={1499--1503},
  year={2016},
  publisher={IEEE}
}

@article{kingma2014adam,
  title={Adam: A method for stochastic optimization},
  author={Kingma, Diederik P and Ba, Jimmy},
  journal={arXiv preprint arXiv:1412.6980},
  year={2014}
}

@inproceedings{he2016deep,
  title={Deep residual learning for image recognition},
  author={He, Kaiming and Zhang, Xiangyu and Ren, Shaoqing and Sun, Jian},
  booktitle={Proceedings of the IEEE conference on computer vision and pattern recognition},
  pages={770--778},
  year={2016}
}

@article{radford2015unsupervised,
  title={Unsupervised representation learning with deep convolutional generative adversarial networks},
  author={Radford, Alec and Metz, Luke and Chintala, Soumith},
  journal={arXiv preprint arXiv:1511.06434},
  year={2015}
}

@article{vaswani2017attention,
  title={Attention is all you need},
  author={Vaswani, Ashish and Shazeer, Noam and Parmar, Niki and Uszkoreit, Jakob and Jones, Llion and Gomez, Aidan N and Kaiser, Lukasz and Polosukhin, Illia},
  journal={Advances in neural information processing systems},
  volume={30},
  year={2017}
}

@inproceedings{szegedy2016rethinking,
  title={Rethinking the inception architecture for computer vision},
  author={Szegedy, Christian and Vanhoucke, Vincent and Ioffe, Sergey and Shlens, Jon and Wojna, Zbigniew},
  booktitle={Proceedings of the IEEE conference on computer vision and pattern recognition},
  pages={2818--2826},
  year={2016}
}

@article{iizuka2017globally,
  title={Globally and locally consistent image completion},
  author={Iizuka, Satoshi and Simo-Serra, Edgar and Ishikawa, Hiroshi},
  journal={ACM Transactions on Graphics (ToG)},
  volume={36},
  number={4},
  pages={1--14},
  year={2017},
  publisher={ACM New York, NY, USA}
}

@inproceedings{zhang2017age,
  title={Age progression/regression by conditional adversarial autoencoder},
  author={Zhang, Zhifei and Song, Yang and Qi, Hairong},
  booktitle={Proceedings of the IEEE conference on computer vision and pattern recognition},
  pages={5810--5818},
  year={2017}
}
