# Supplementary material
Source: ML conference proceedings conference paper supplement (https://openaccess.thecvf.com/content/ACCV2022/html/Cha_SAC-GAN__Face_ACCV_2022_paper.html)

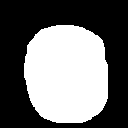

Supplement: Supplementary file 1 [file Cha_SAC-GAN__Face_ACCV_2022_supplemental.pdf › 0895-source_codes/mask/face_mask.png]

GT

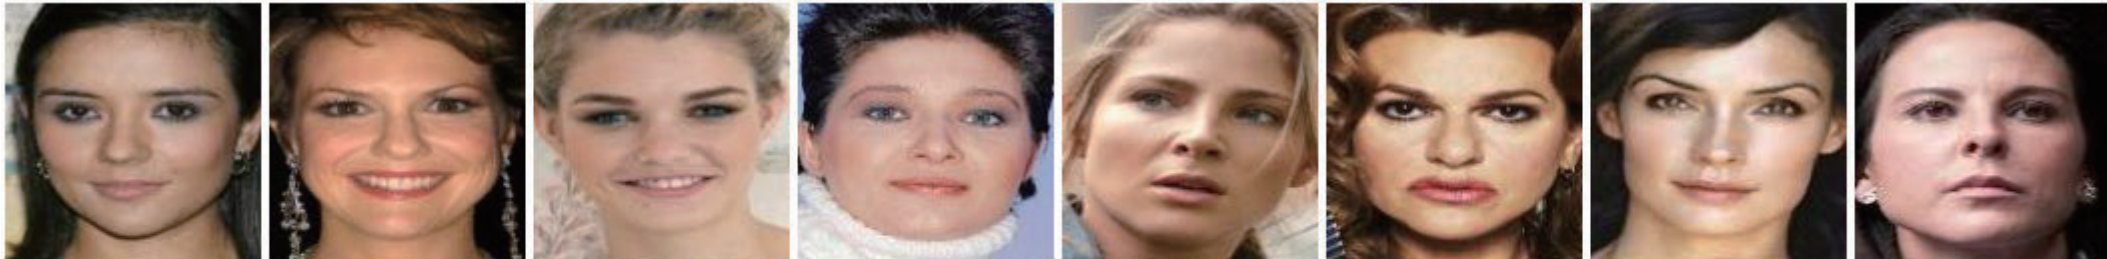

Input

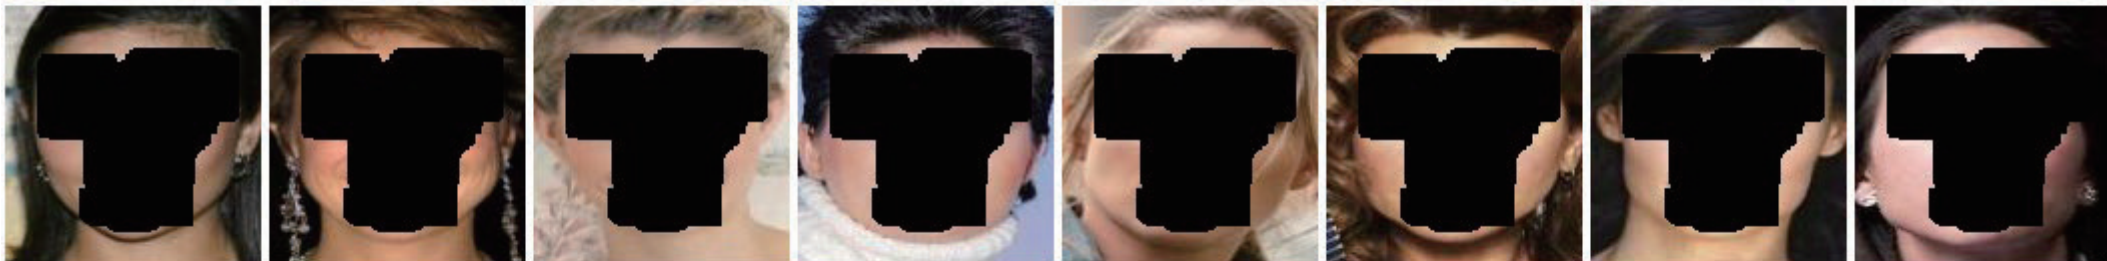

Output

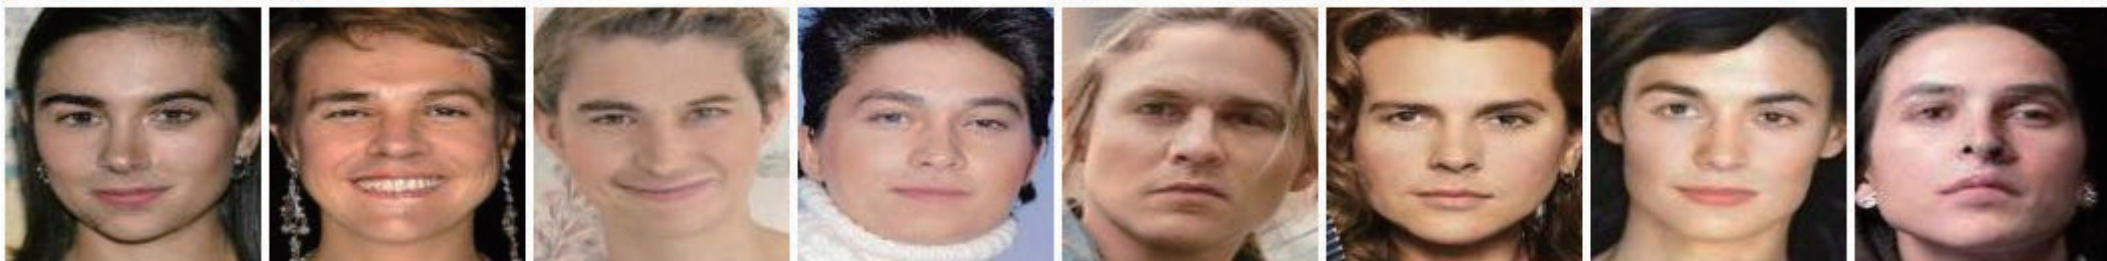

Supplement: Supplementary file 1 [file Cha_SAC-GAN__Face_ACCV_2022_supplemental.pdf › supple_figs/f_m-eps-converted-to.pdf]

GT

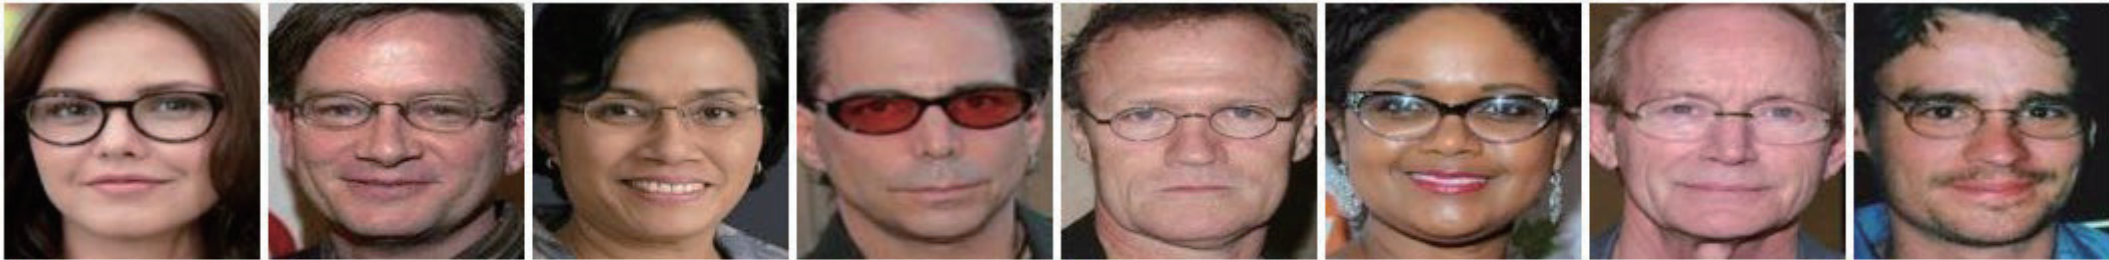

Input

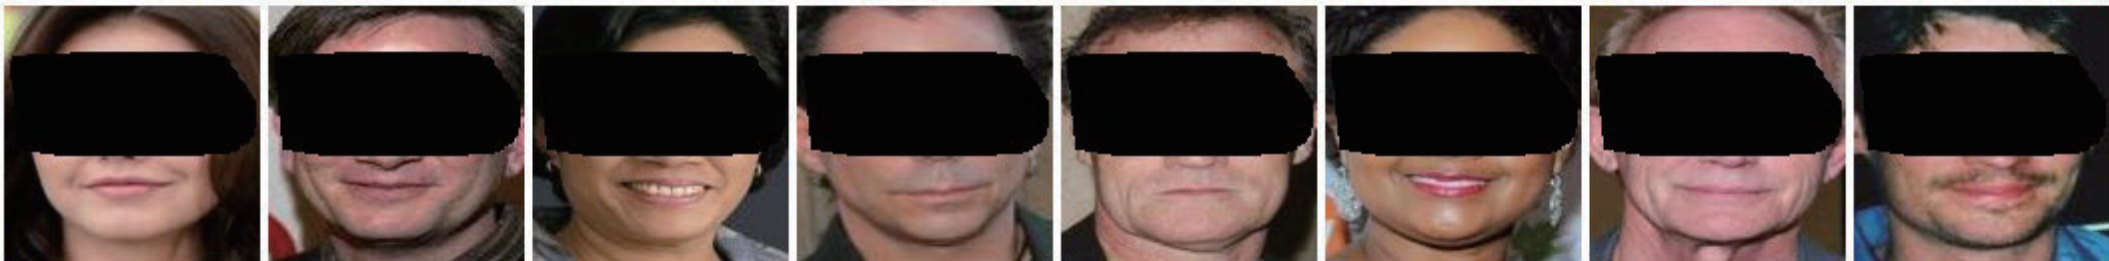

Output

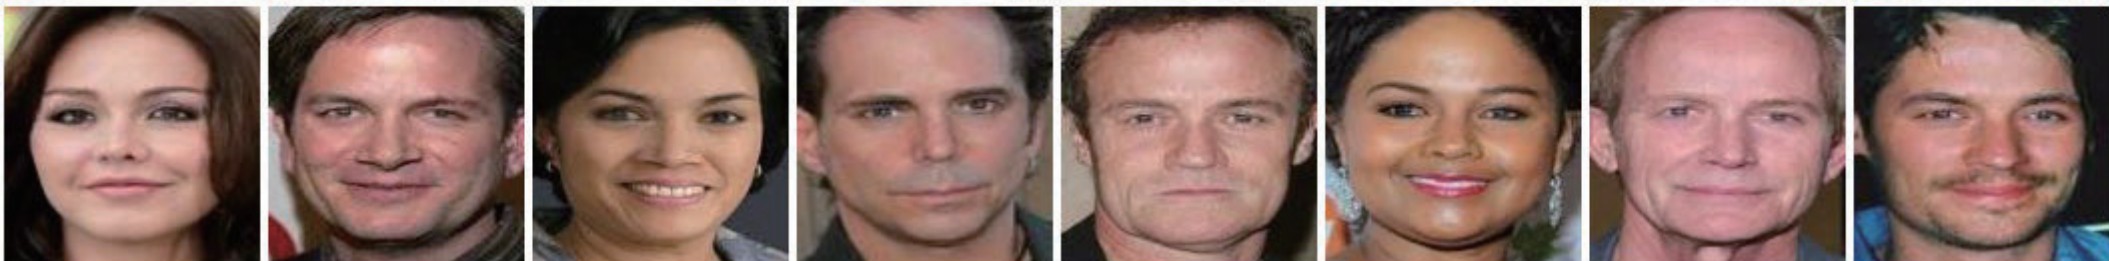

Supplement: Supplementary file 1 [file Cha_SAC-GAN__Face_ACCV_2022_supplemental.pdf › supple_figs/g_ng-eps-converted-to.pdf]

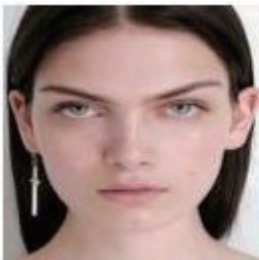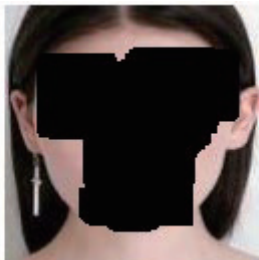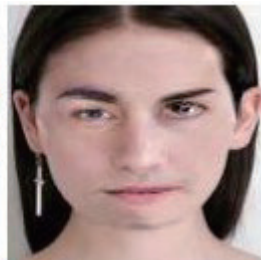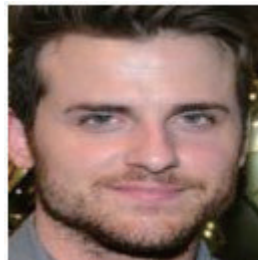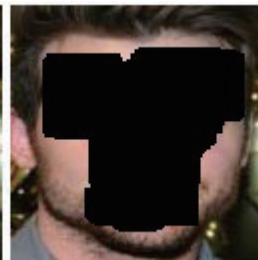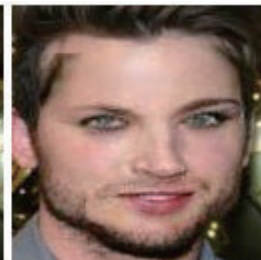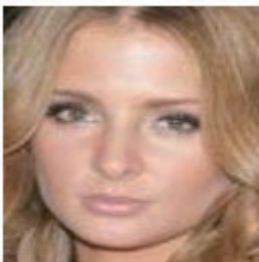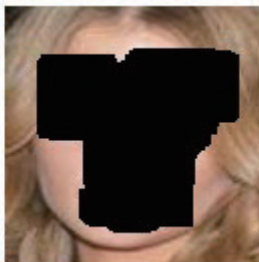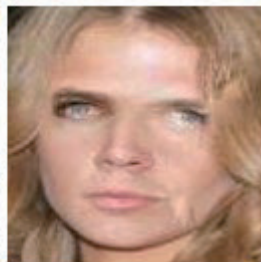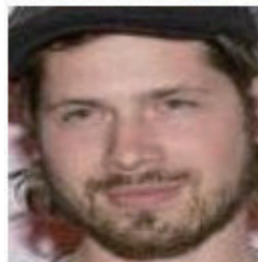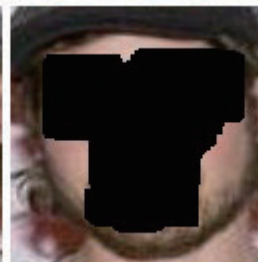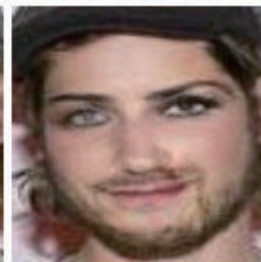

GT

Input

Output

GT

Input

Output

Supplement: Supplementary file 1 [file Cha_SAC-GAN__Face_ACCV_2022_supplemental.pdf › supple_figs/gender_fail-eps-converted-to.pdf]

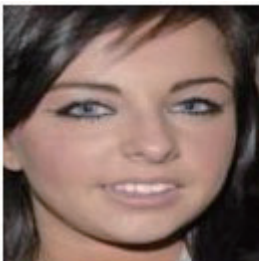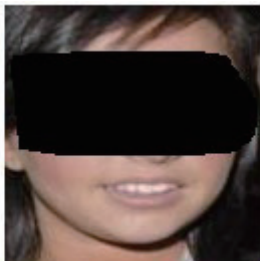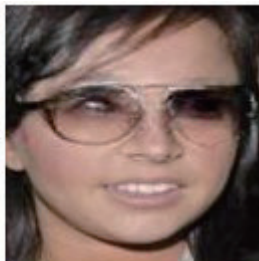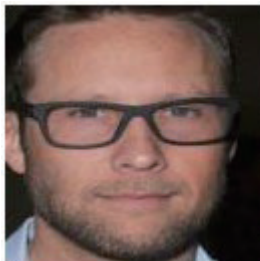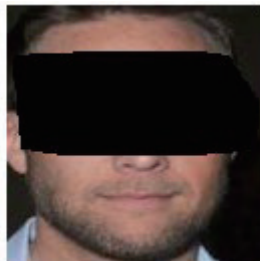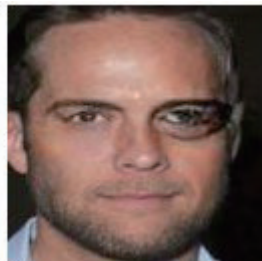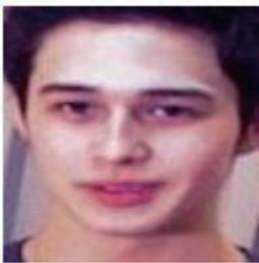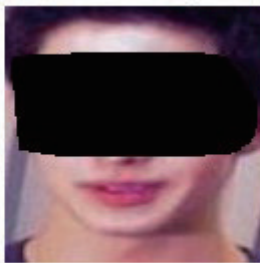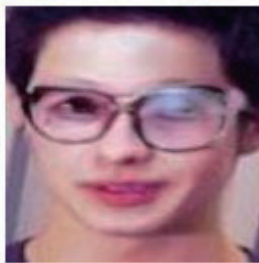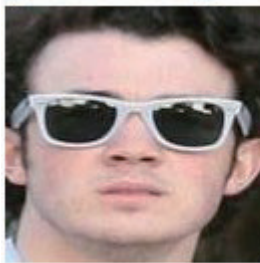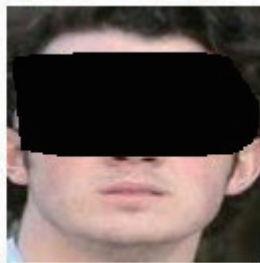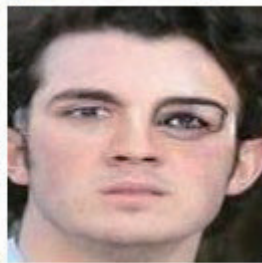

GT

Input

Output

GT

Input

Output

Supplement: Supplementary file 1 [file Cha_SAC-GAN__Face_ACCV_2022_supplemental.pdf › supple_figs/glasses_fail-eps-converted-to.pdf]

GT

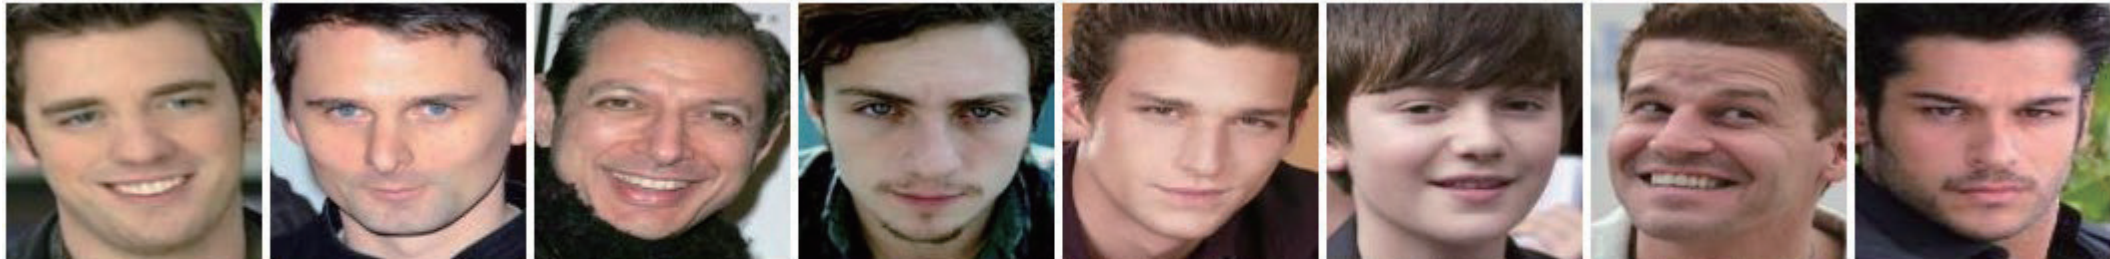

Input

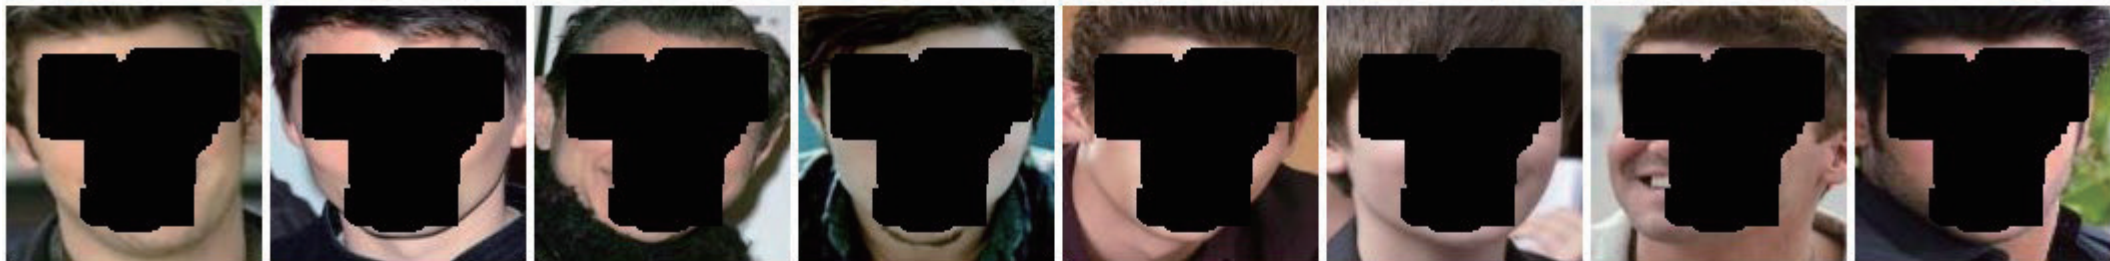

Output

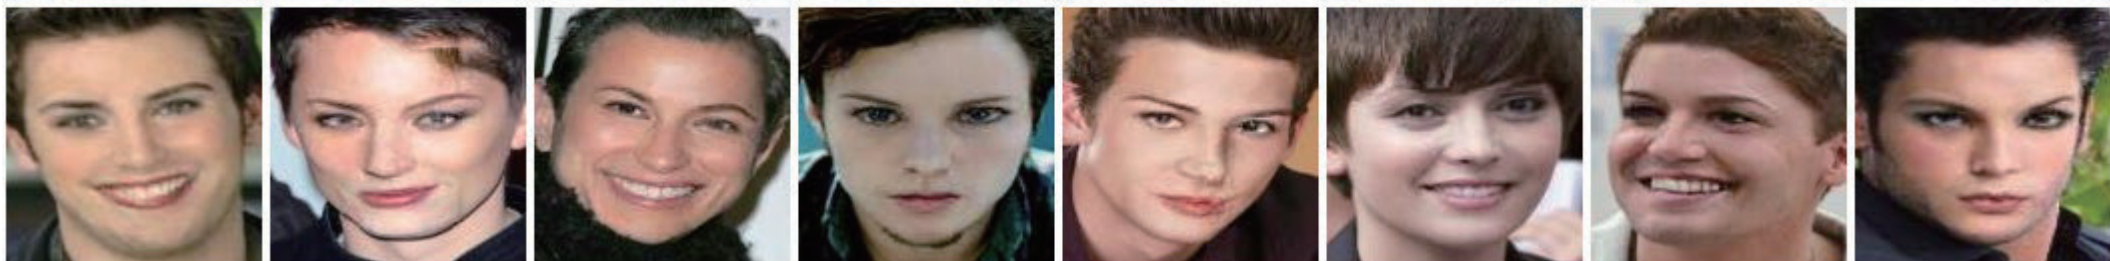

Supplement: Supplementary file 1 [file Cha_SAC-GAN__Face_ACCV_2022_supplemental.pdf › supple_figs/m_f-eps-converted-to.pdf]

GT

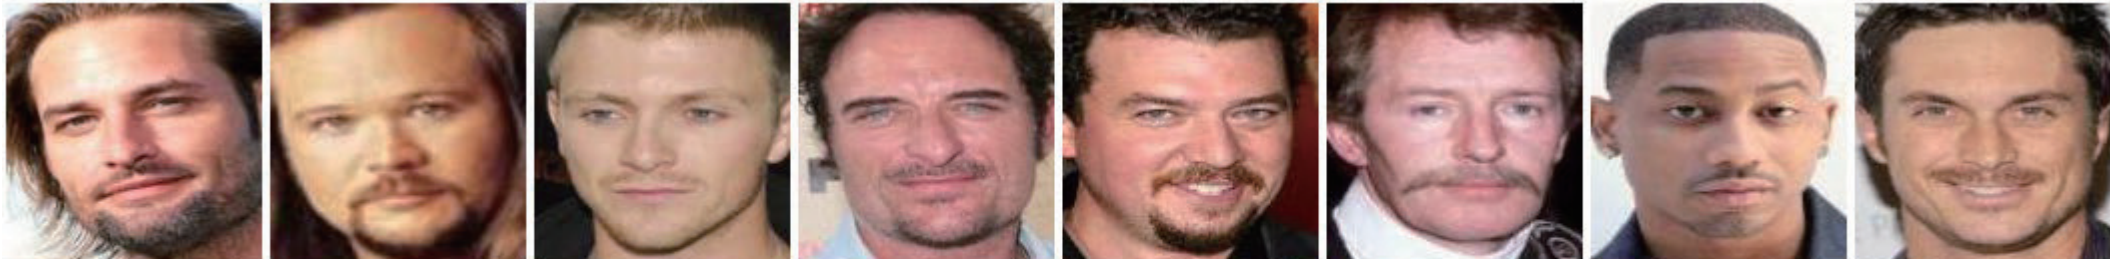

Input

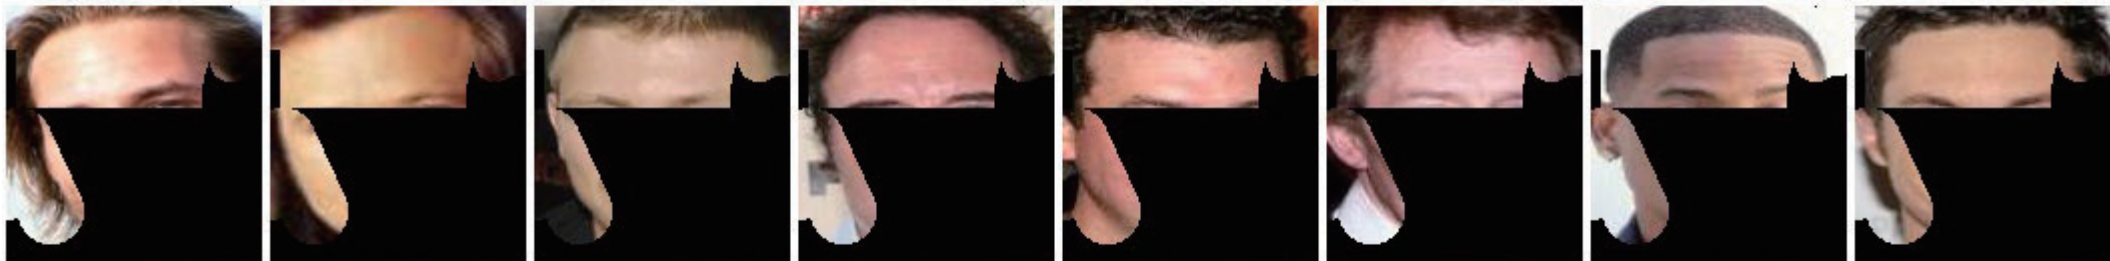

Output

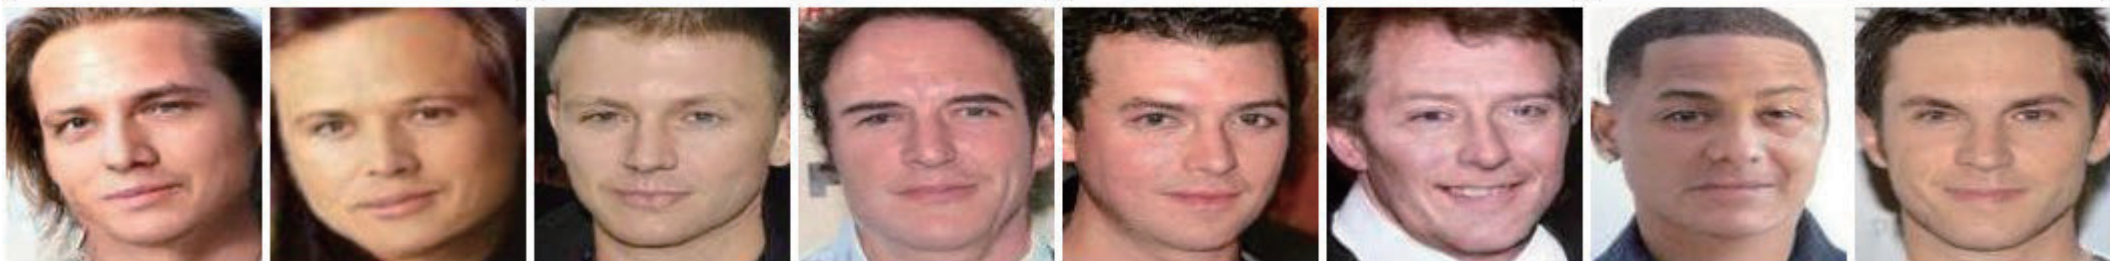

Supplement: Supplementary file 1 [file Cha_SAC-GAN__Face_ACCV_2022_supplemental.pdf › supple_figs/m_nm-eps-converted-to.pdf]

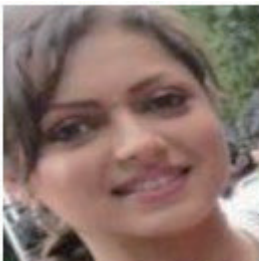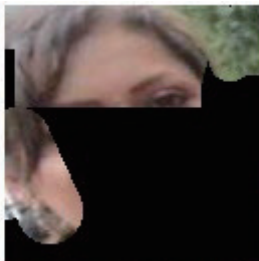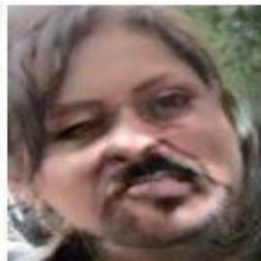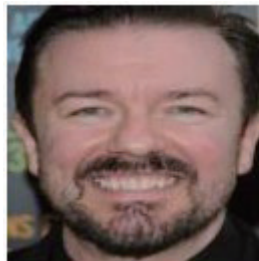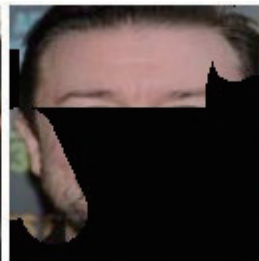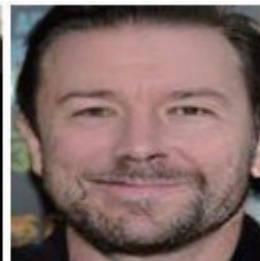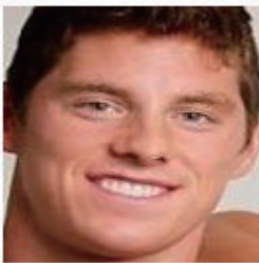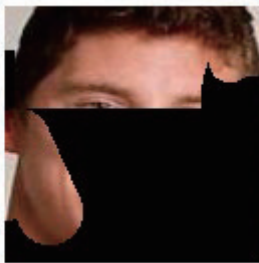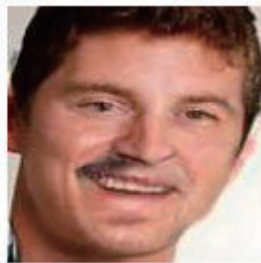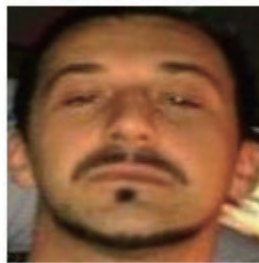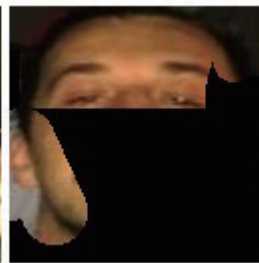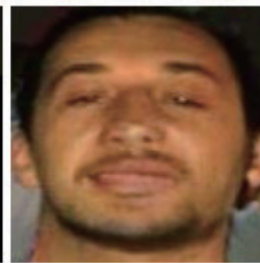

GT

Input

Output

GT

Input

Output

Supplement: Supplementary file 1 [file Cha_SAC-GAN__Face_ACCV_2022_supplemental.pdf › supple_figs/mustache_fail-eps-converted-to.pdf]

GT

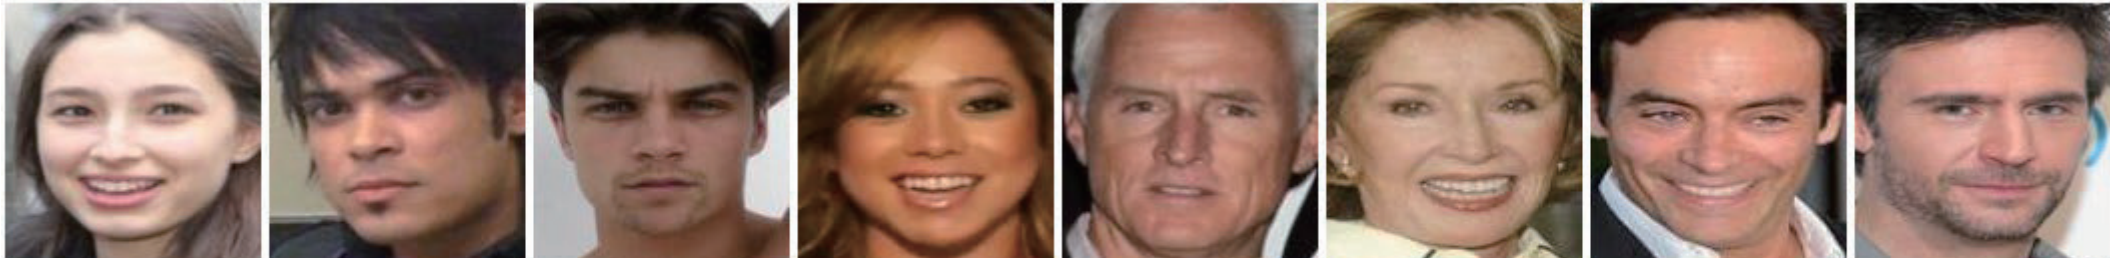

Input

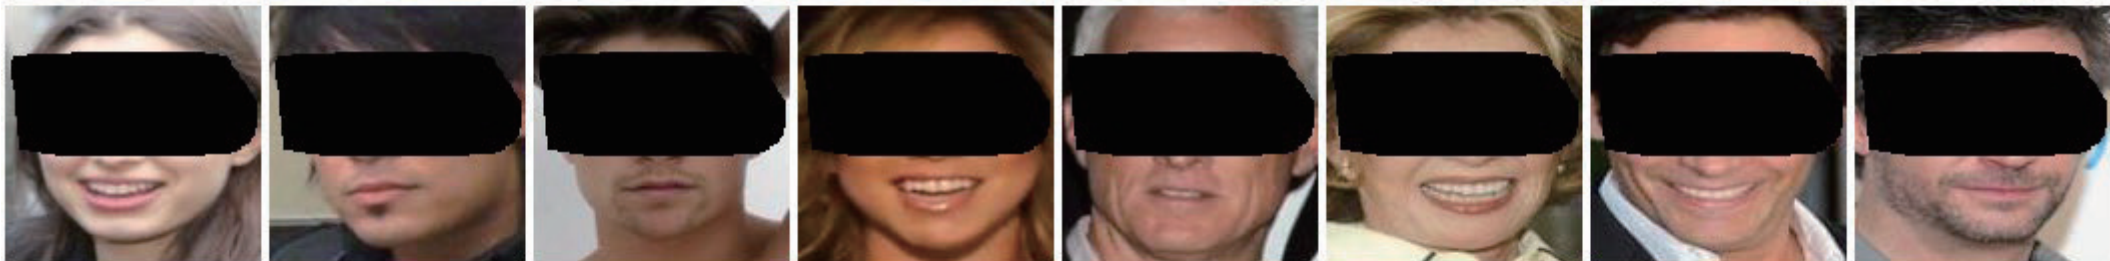

Output

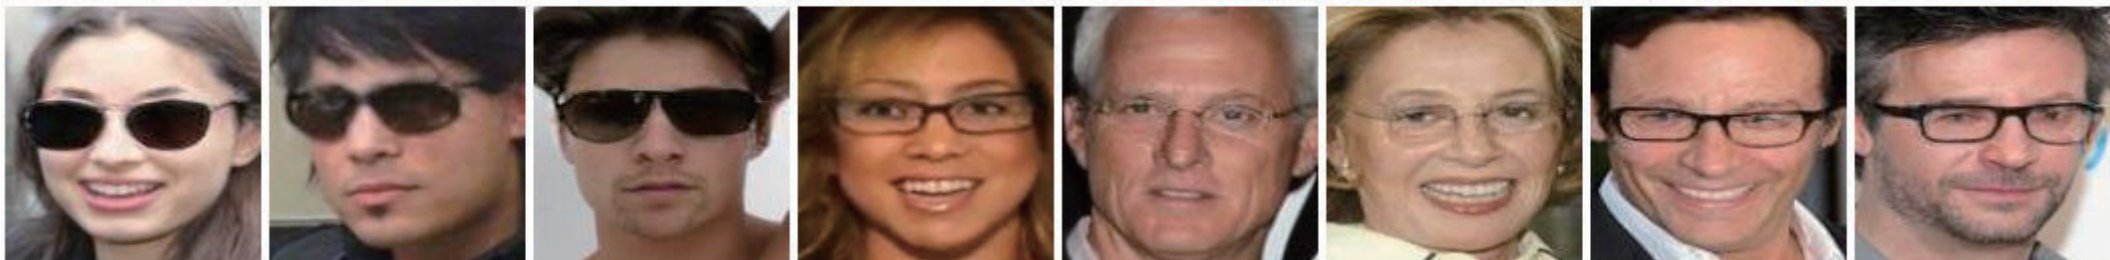

Supplement: Supplementary file 1 [file Cha_SAC-GAN__Face_ACCV_2022_supplemental.pdf › supple_figs/ng_g-eps-converted-to.pdf]

GT

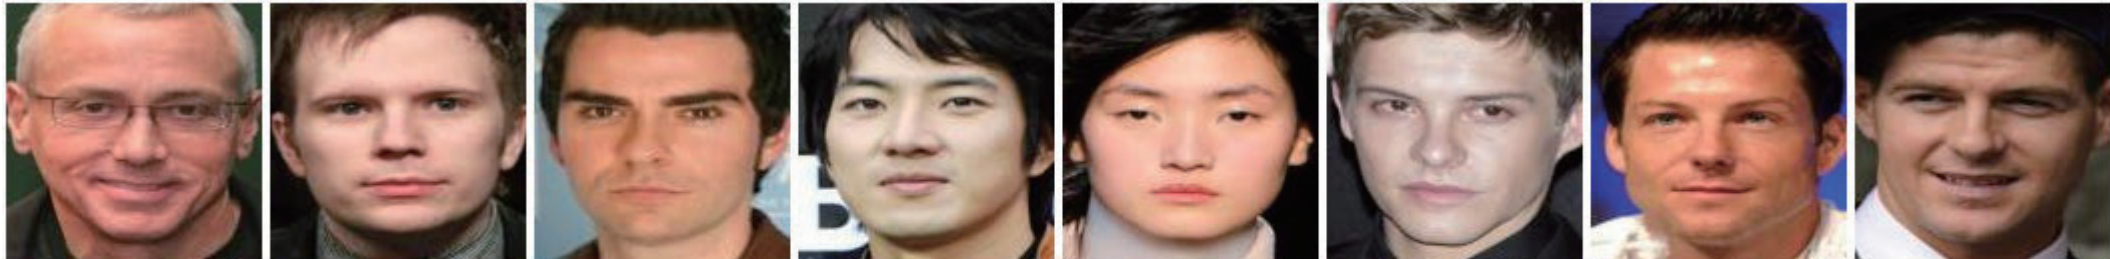

Input

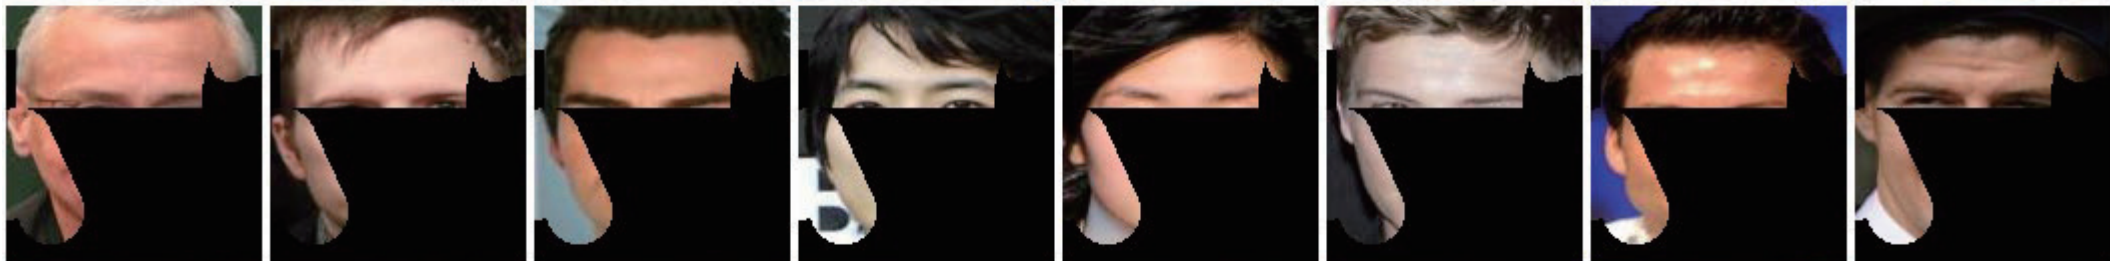

Output

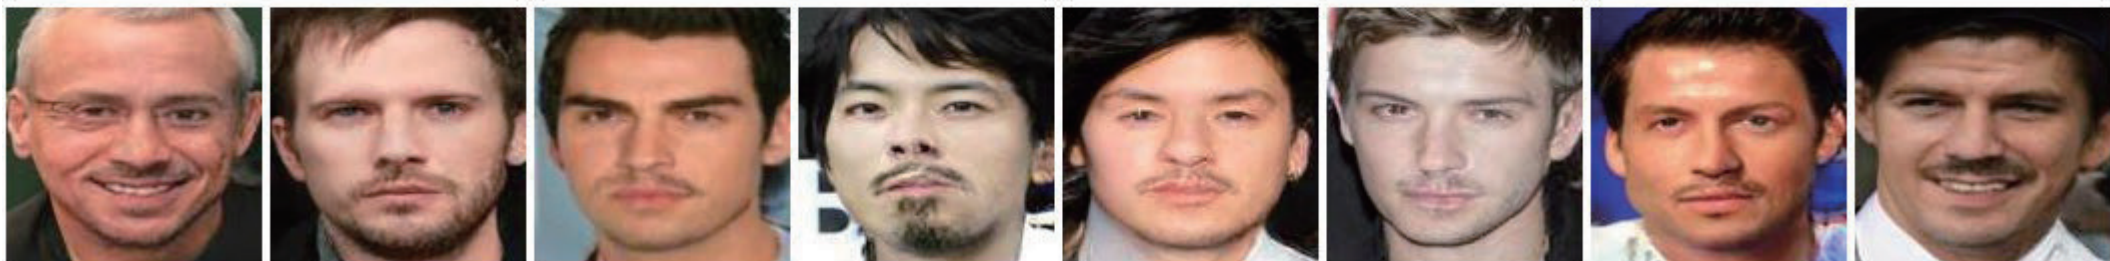

Supplement: Supplementary file 1 [file Cha_SAC-GAN__Face_ACCV_2022_supplemental.pdf › supple_figs/nm_m-eps-converted-to.pdf]

GT

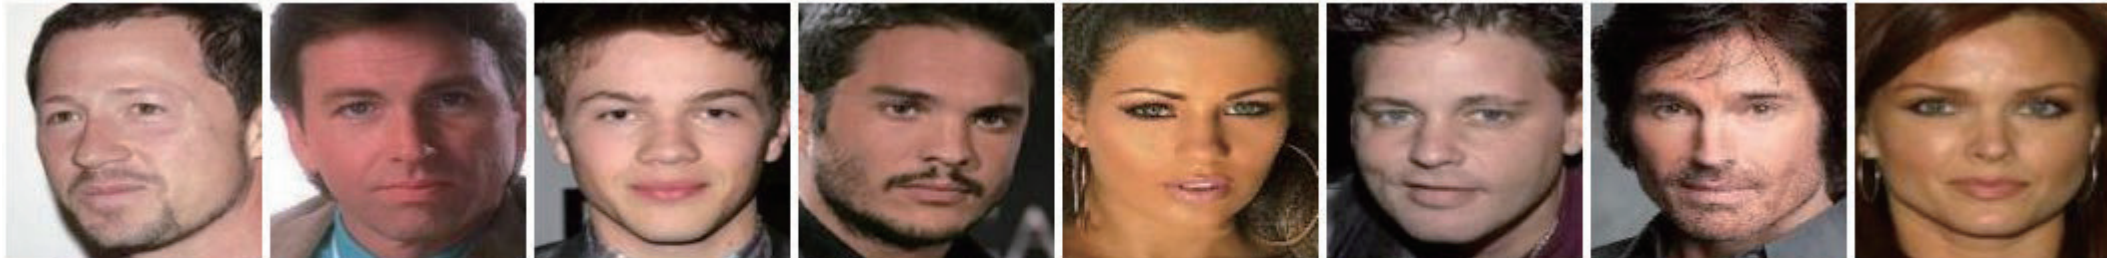

Input

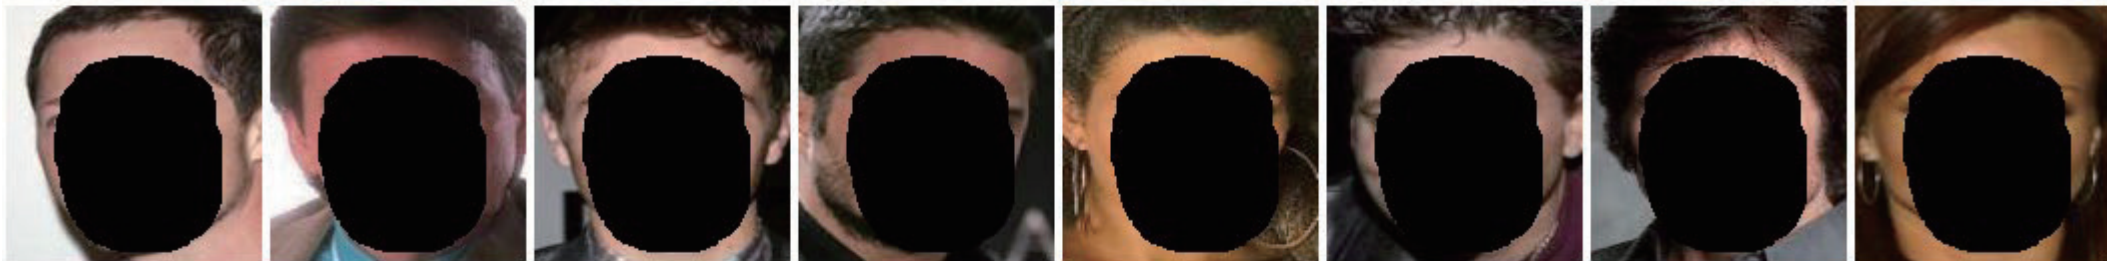

Output

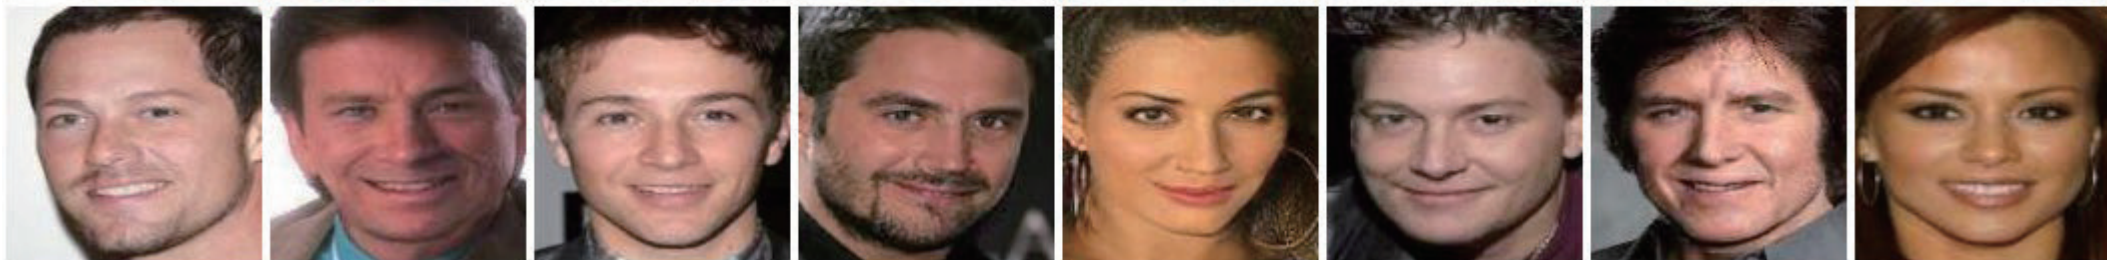

Supplement: Supplementary file 1 [file Cha_SAC-GAN__Face_ACCV_2022_supplemental.pdf › supple_figs/ns_s-eps-converted-to.pdf]

GT

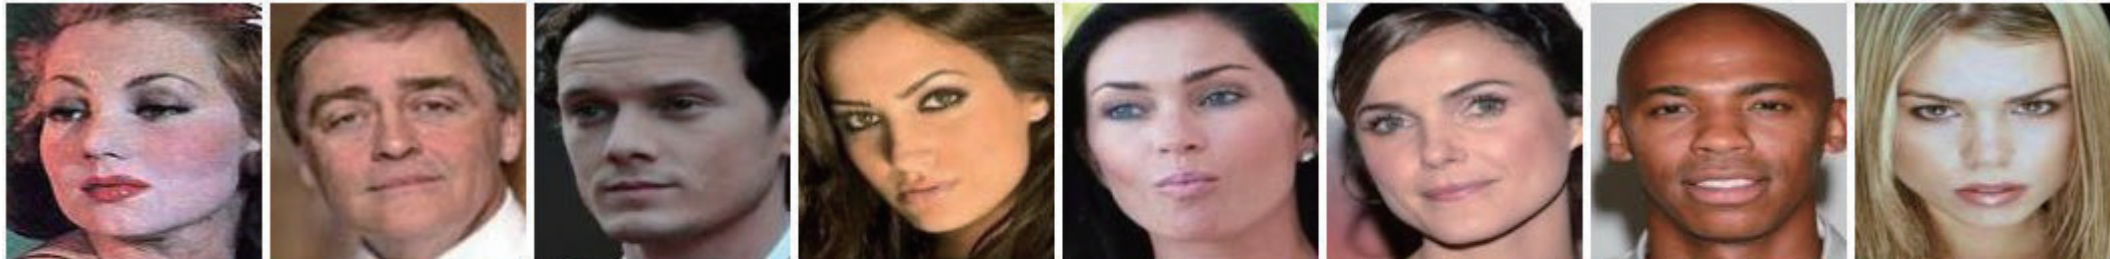

Input

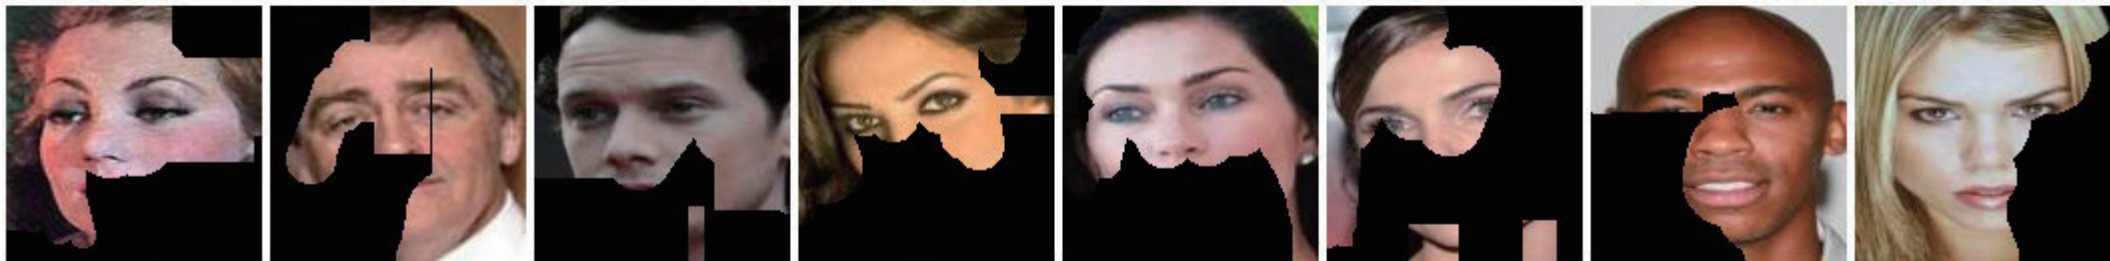

Output

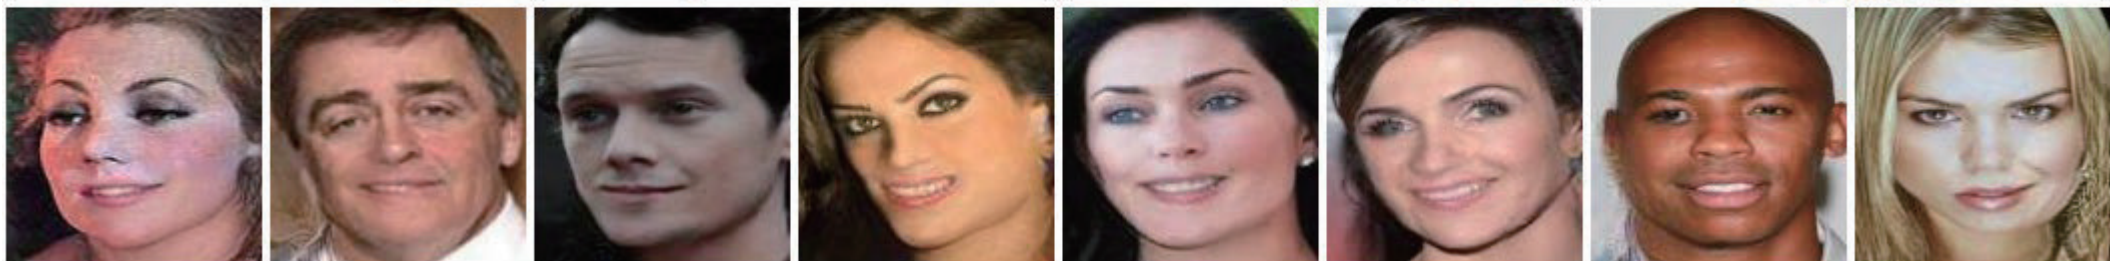

Supplement: Supplementary file 1 [file Cha_SAC-GAN__Face_ACCV_2022_supplemental.pdf › supple_figs/ns_s_rand-eps-converted-to.pdf]

GT

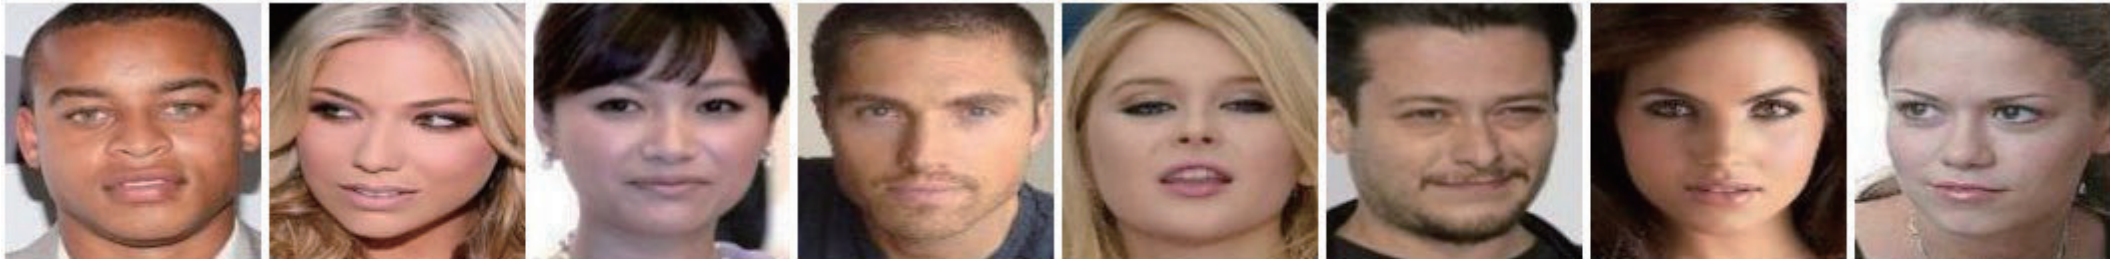

Input

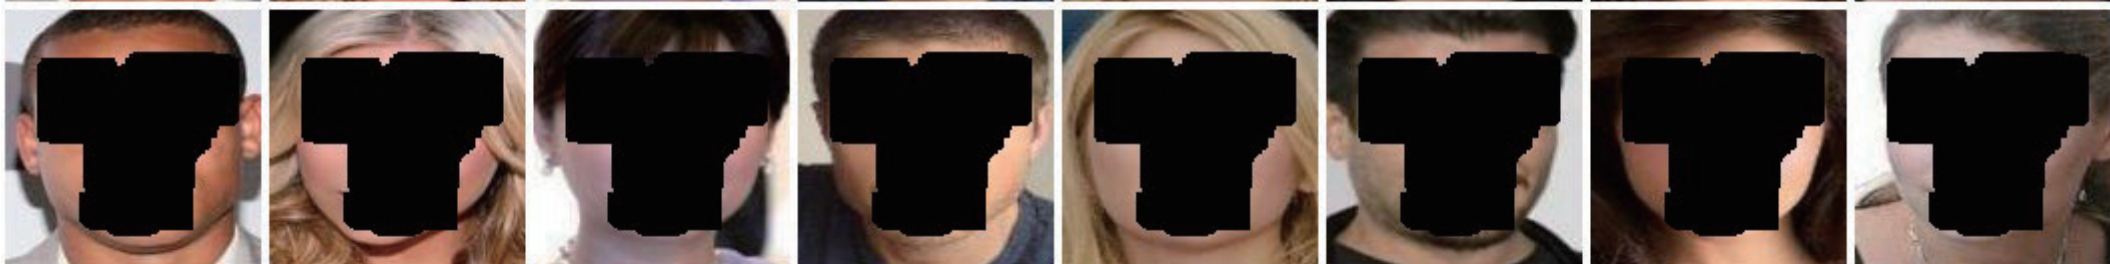

Output

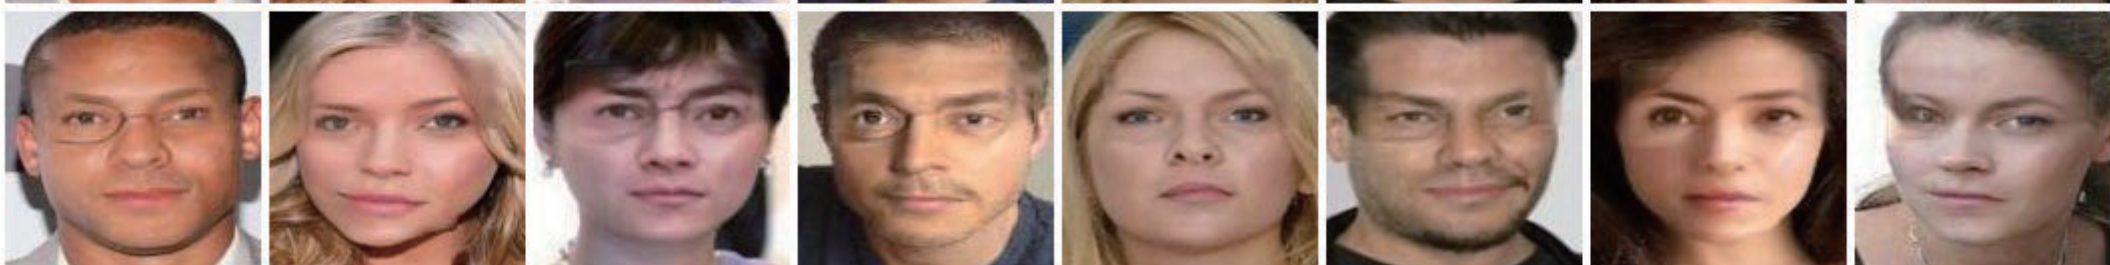Output  
(+UTK)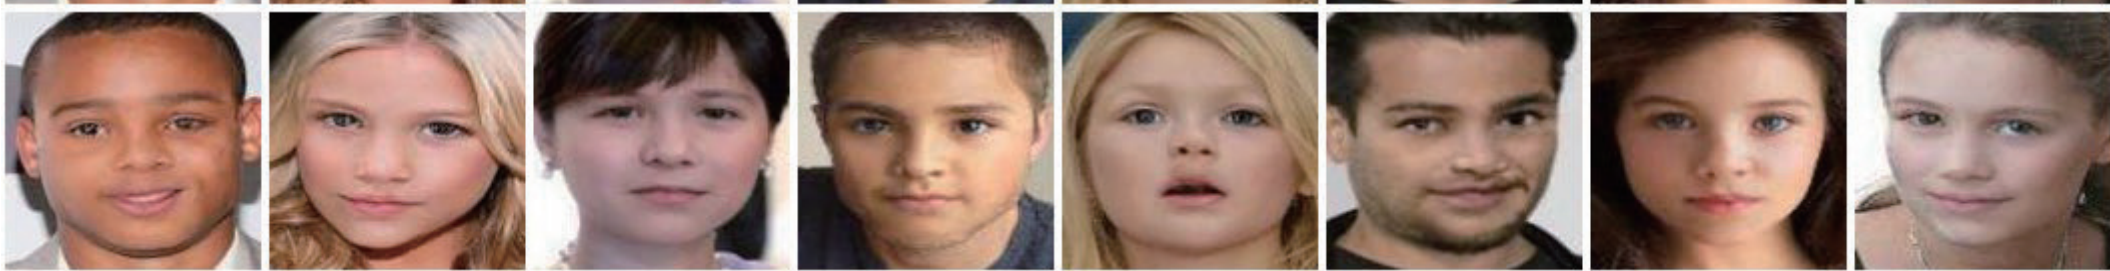

Supplement: Supplementary file 1 [file Cha_SAC-GAN__Face_ACCV_2022_supplemental.pdf › supple_figs/o_y-eps-converted-to.pdf]

GT

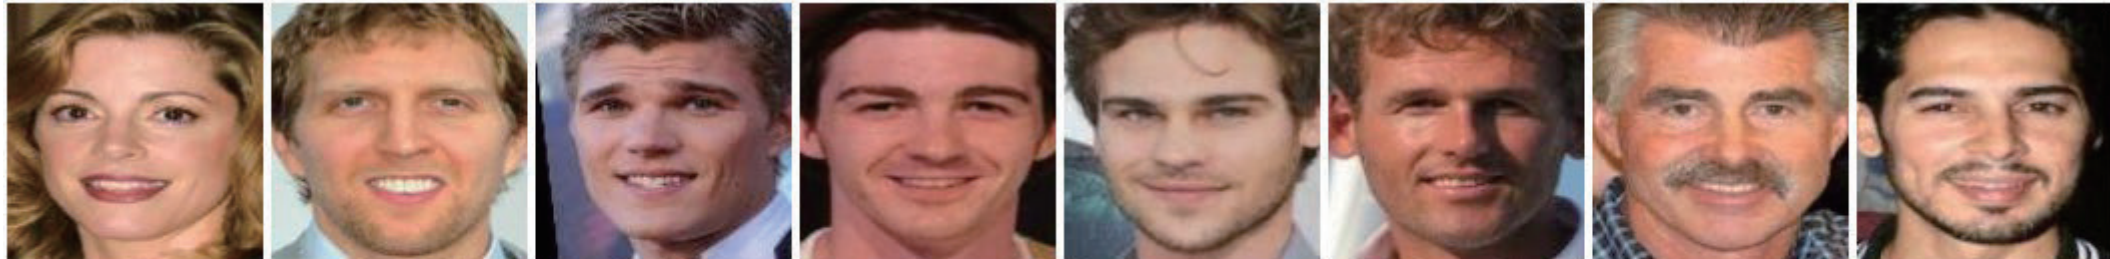

Input

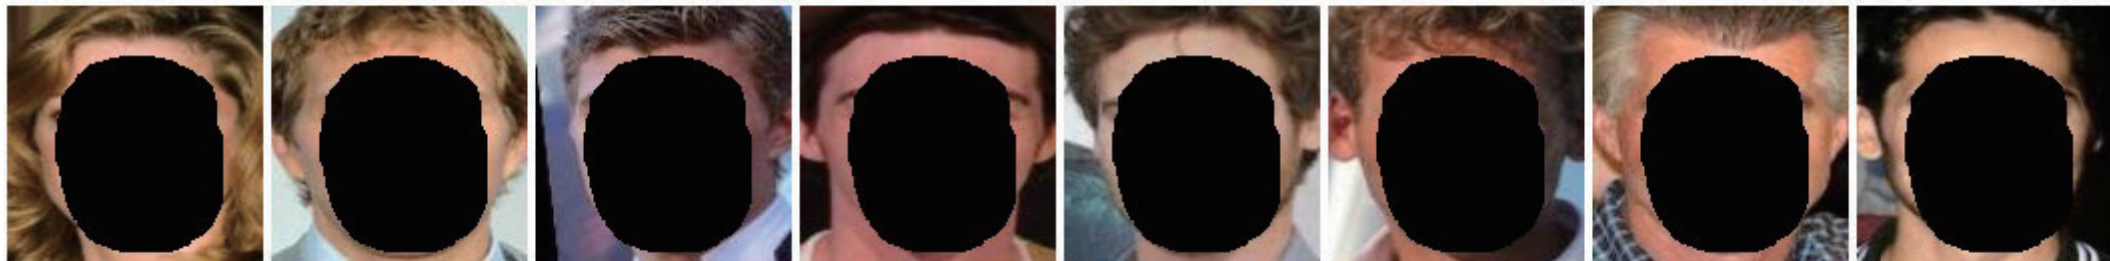

Output

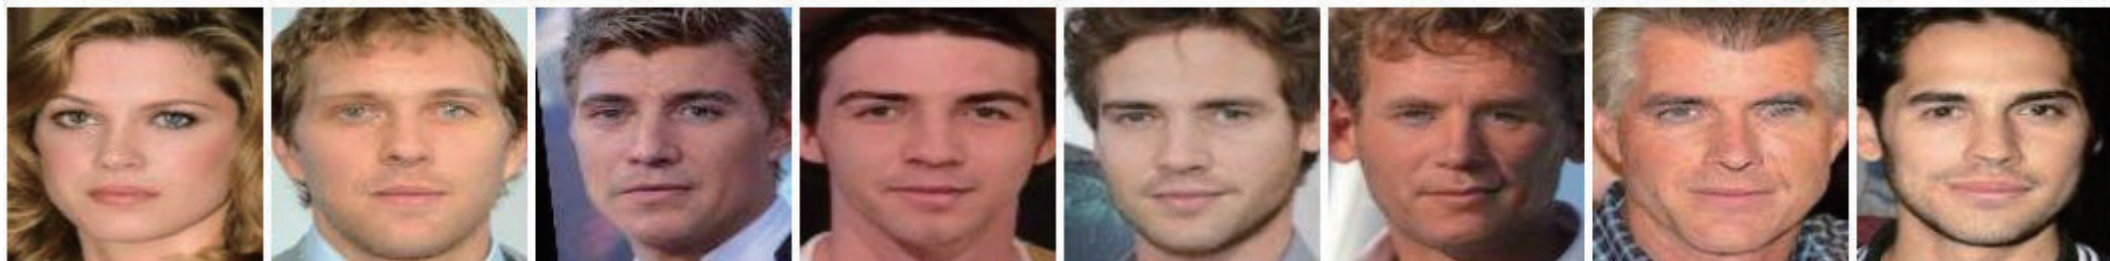

Supplement: Supplementary file 1 [file Cha_SAC-GAN__Face_ACCV_2022_supplemental.pdf › supple_figs/s_ns-eps-converted-to.pdf]

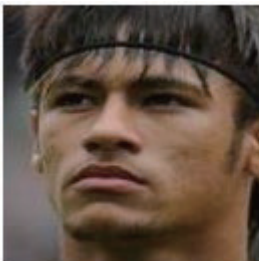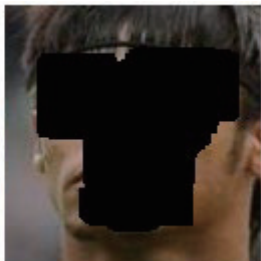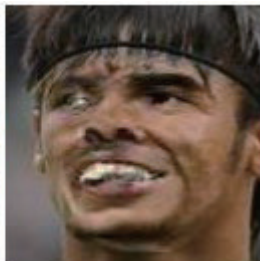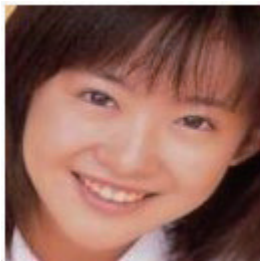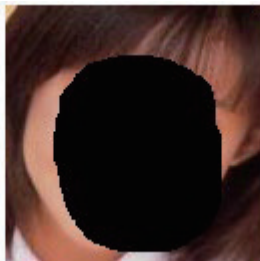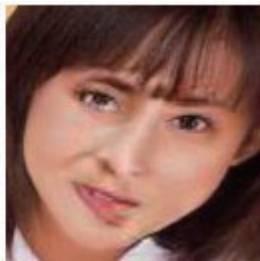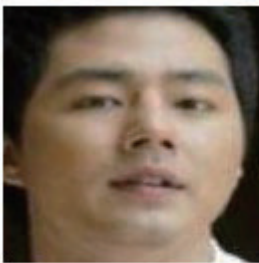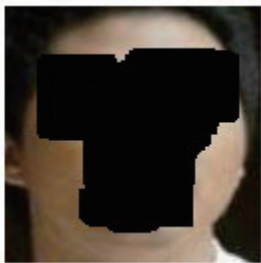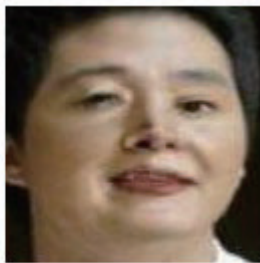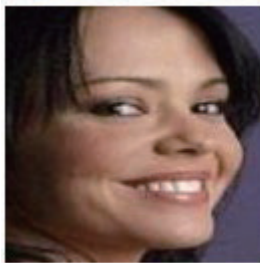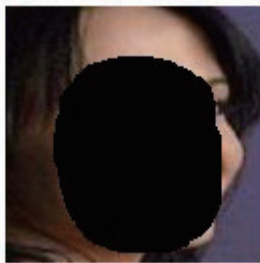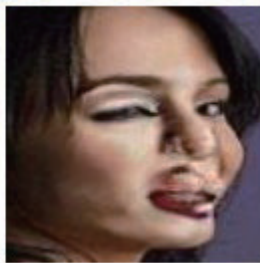

GT

Input

Output

GT

Input

Output

Supplement: Supplementary file 1 [file Cha_SAC-GAN__Face_ACCV_2022_supplemental.pdf › supple_figs/smile_fail-eps-converted-to.pdf]

GT

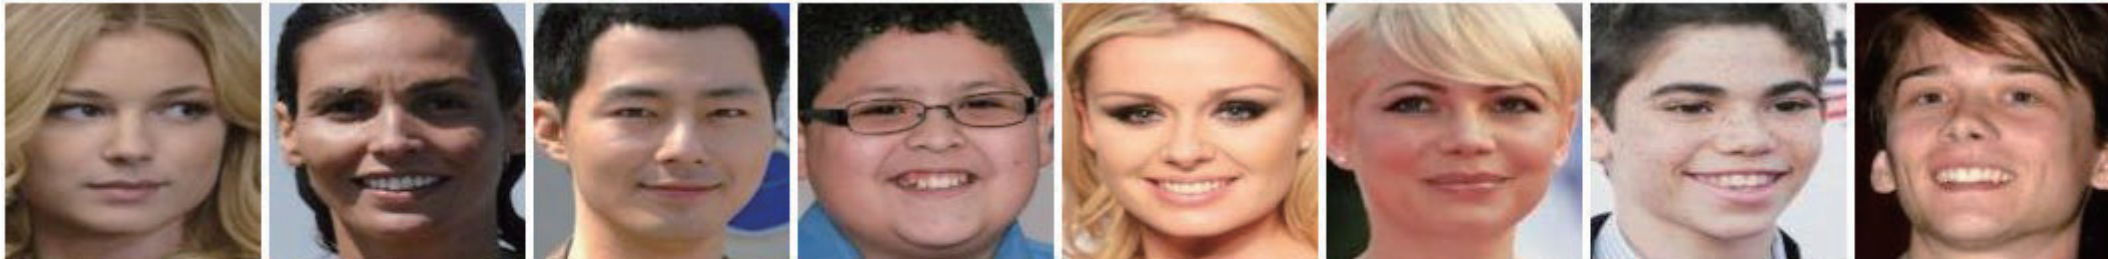

Input

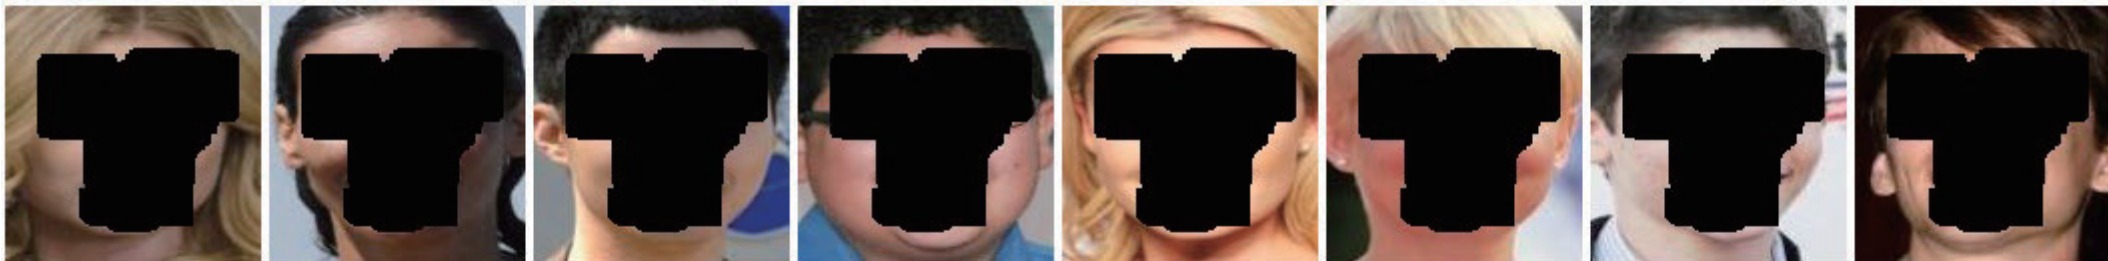

Output

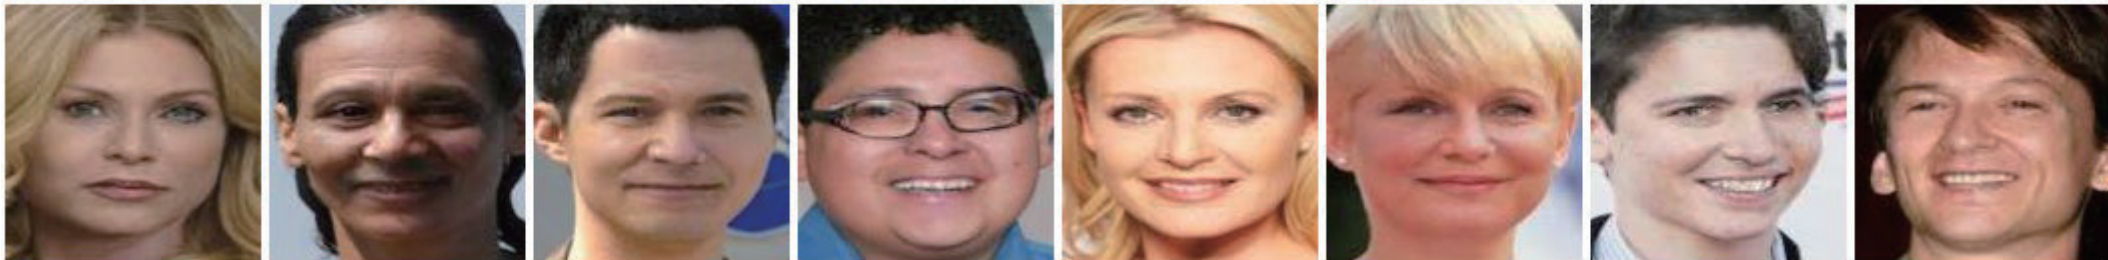

Supplement: Supplementary file 1 [file Cha_SAC-GAN__Face_ACCV_2022_supplemental.pdf › supple_figs/y_o-eps-converted-to.pdf]
